# Supplementary material for: Copper-Promoted Conjugate Addition of Carboxylic Acids to Ethenesulfonyl Fluoride (ESF) for Constructing Aliphatic Sulfonyl Fluorides
Source: PubMed Central journal article supplement — ACS Omega. 2021 Sep 27;6(40):25972–81. doi: 10.1021/acsomega.1c02804 (PMC8515394; doi:10.1021/acsomega.1c02804), 2021-09-27
Supplement: ao1c02804_si_001.pdf [file ao1c02804_si_001.pdf]

## Supporting Information

### **Copper-Promoted Conjugate Addition of Carboxylic Acids to Ethenesulfonyl Fluoride (ESF) for Constructing Aliphatic Sulfonyl Fluorides**

Xu Zhang<sup>†a</sup>, Yu-Mei Huang<sup>†a</sup>, Hua-Li Qin<sup>\*a</sup>, Zhang Baoguo<sup>\*b</sup>, K. P. Rakesh<sup>a</sup> and Haolin Tang<sup>\*a</sup>

<sup>a</sup>School of Chemistry, Chemical Engineering and Life Science; and State Key Laboratory of Advanced Technology for Materials Synthesis and Processing, Wuhan University of Technology, Wuhan 430070, China.

<sup>b</sup>Lab of Biorefinery, Shanghai Advanced Research Institute, Chinese Academy of Sciences, No. 99 Haik Road, Pudong, Shanghai 201210, China.

Fax: + 86 27 87749300

E-mail: qinhuali@whut.edu.cn; zhangbg@sari.ac.cn; thln@whut.edu.cn.

<sup>†</sup>These authors contributed equally to this work

## 1. Screening the Optimized Reaction Conditions.

Table S1 Screening the [Cu] Catalyst<sup>a</sup>

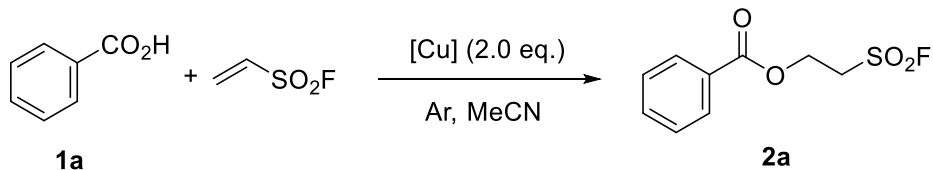

| Entry          | Catalyst                            | Conversion ( <b>1a</b> , %) | Yield ( <b>2a</b> , %) <sup>b</sup> |
|----------------|-------------------------------------|-----------------------------|-------------------------------------|
| 1 <sup>c</sup> | Cu(OAc) <sub>2</sub>                | 90                          | 17                                  |
| 2              | Cu(OAc) <sub>2</sub>                | 93                          | 32                                  |
| 3              | CuBr <sub>2</sub>                   | 99                          | \                                   |
| 4              | CuF <sub>2</sub>                    | 99                          | 33                                  |
| 5              | Cu(OTf) <sub>2</sub>                | 41                          | \                                   |
| 6              | Cu(acac) <sub>2</sub>               | 36                          | \                                   |
| 7              | Cu(CF <sub>3</sub> CO) <sub>2</sub> | 98                          | 27                                  |
| 8              | CuSO <sub>4</sub>                   | 98                          | 46                                  |
| 9              | <b>CuO</b>                          | <b>99</b>                   | <b>74</b>                           |
| 10             | Cu <sub>2</sub> O                   | \                           | \                                   |

<sup>a</sup>Reaction condition: Benzoic acid (**1a**, 0.1 mmol), ESF (2.0 eq., 0.2 mmol), [Cu] catalyst (2.0 eq.), undried CH<sub>3</sub>CN (2 mL) were added in a sealed tube (20 mL) under argon atmosphere and the reaction mixture was stirred at 80 °C for 20 h. <sup>b</sup>The yields were determined by HPLC using **2a** as the external standard ( $t_R = 7.5$  min,  $\lambda_{max} = 229.9$  nm, water / acetonitrile = 50 : 50 (v / v)). <sup>c</sup>In the air.

**Table S2 Screening of the Solvent <sup>a</sup>**

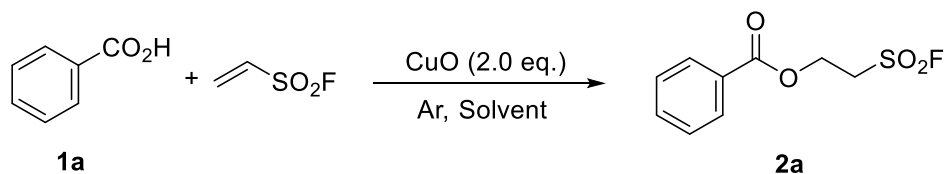

| Entry          | Solvent (2 mL)                    | Conversion ( <b>1a</b> , %) | Yield ( <b>2a</b> , %) <sup>b</sup> |
|----------------|-----------------------------------|-----------------------------|-------------------------------------|
| 1              | CH <sub>3</sub> CN                | 97                          | 76                                  |
| 2 <sup>c</sup> | anhydrous CH <sub>3</sub> CN      | 83                          | 20                                  |
| <b>3</b>       | <b>anhydrous CH<sub>3</sub>CN</b> | <b>98</b>                   | <b>89</b>                           |
| 4              | Toluene                           | 13                          | N.D.                                |
| 5              | DMF                               | 2                           | N.D.                                |
| 6              | 1,4-dioxane                       | 1                           | N.D.                                |
| 7              | DMA                               | 39                          | 34                                  |
| 8              | DMSO                              | \                           | N.D.                                |
| 9              | Trifluorotoluene                  | 3                           | N.D.                                |
| 10             | DCE                               | 2                           | N.D.                                |
| 11             | Acetone                           | 5                           | N.D.                                |
| 12             | THF                               | \                           | N.D.                                |

<sup>a</sup>Reaction condition: Benzoic acid (**1a**, 0.1 mmol), ESF (2.0 eq., 0.2 mmol), CuO (2.0 eq., 16 mg), solvent (2 mL) were added in a sealed tube (20 mL) under argon atmosphere and the reaction mixture was stirred at 80 °C for 20 h. <sup>b</sup>The yields were determined by HPLC using **2a** as the external standard ( $t_R = 7.5$  min,  $\lambda_{max} = 229.9$  nm, water / acetonitrile = 50 : 50 (v / v)). <sup>c</sup>In the air.

N.D. means not detected.

**Table S3 Screening of CuO Loading <sup>a</sup>**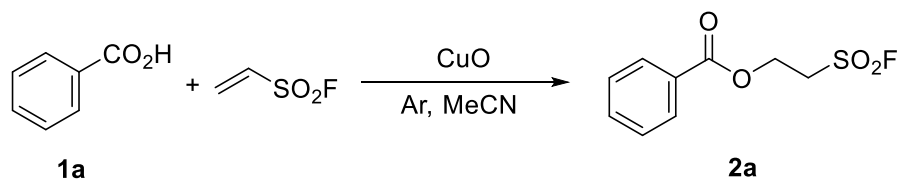

| Entry    | CuO (X equiv.) | Conversion ( <b>1a</b> , %) | Yield ( <b>2a</b> , %) <sup>b</sup> |
|----------|----------------|-----------------------------|-------------------------------------|
| 1        | 2.0            | 96                          | 87                                  |
| 2        | 1.5            | 97                          | 76                                  |
| <b>3</b> | <b>1.0</b>     | <b>99</b>                   | <b>91</b>                           |
| 4        | 0.5            | 97                          | 74                                  |
| 5        | 0.2            | 97                          | 65                                  |
| 6        | \              | 0                           | trace                               |

<sup>a</sup>Reaction condition: Benzoic acid (**1a**, 0.1 mmol), ESF (2.0 eq., 0.2 mmol), CuO, anhydrous CH<sub>3</sub>CN (2 mL) were added in a sealed tube (20 mL) under argon atmosphere and the reaction mixture was stirred at 80 °C for 20 h. <sup>b</sup>The yields were determined by HPLC using **2a** as the external standard (*t<sub>R</sub>* = 7.5 min, λ<sub>max</sub> = 229.9 nm, water / acetonitrile = 50 : 50 (v / v)).

**Table S4 Screening of ESF Loading <sup>a</sup>**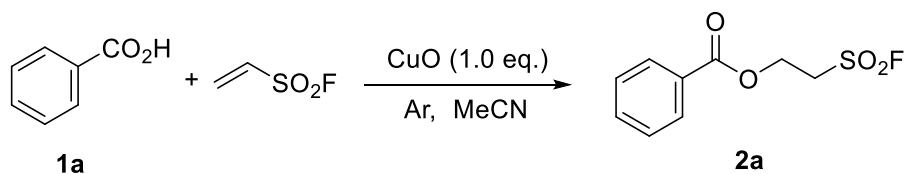

| Entry    | ESF (equiv.) | Conversion ( <b>1a</b> , %) | Yield ( <b>2a</b> , %) <sup>b</sup> |
|----------|--------------|-----------------------------|-------------------------------------|
| 1        | 4.0          | 90                          | 73                                  |
| <b>2</b> | <b>2.0</b>   | <b>96</b>                   | <b>88</b>                           |
| 3        | 1.5          | 84                          | 70                                  |
| 4        | 1.2          | 83                          | 69                                  |
| 5        | 1.0          | 75                          | 57                                  |

<sup>a</sup>Reaction condition: Benzoic acid (**1a**, 0.1 mmol), ESF (2.0 eq., 0.2 mmol), CuO (1.0 eq., 8 mg), anhydrous CH<sub>3</sub>CN (2 mL) were added in a sealed tube (20 mL) under argon atmosphere and the reaction mixture was stirred at 80 °C for 20 h. <sup>b</sup>The yields were determined by HPLC using **2a** as the external standard ( $t_R = 7.5$  min,  $\lambda_{max} = 229.9$  nm, water / acetonitrile = 50 : 50 (v / v)).

**Table S5 Screening of Temperature <sup>a</sup>**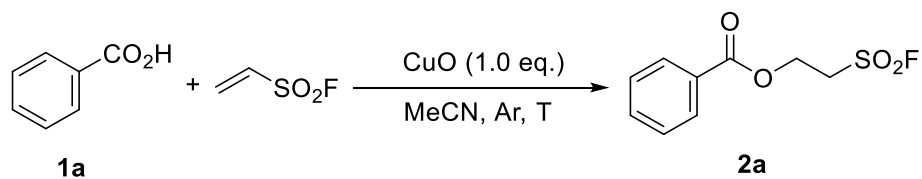

| Entry    | T (°C)    | Conversion ( <b>1a</b> , %) | Yield ( <b>2a</b> , %) <sup>b</sup> |
|----------|-----------|-----------------------------|-------------------------------------|
| 1        | 25        | 90                          | 4                                   |
| 2        | 40        | 93                          | 5                                   |
| 3        | 50        | 91                          | 11                                  |
| 4        | 60        | 90                          | 51                                  |
| 5        | 70        | 95                          | 80                                  |
| <b>6</b> | <b>80</b> | <b>96</b>                   | <b>91</b>                           |
| 7        | 90        | 94                          | 87                                  |
| 8        | 100       | 94                          | 85                                  |
| 9        | 110       | 90                          | 76                                  |

<sup>a</sup>Reaction condition: Benzoic acid (**1a**, 0.1 mmol), ESF (2.0 eq., 0.2 mmol),  $\text{CuO}$  (1.0 eq., 8 mg), anhydrous  $\text{CH}_3\text{CN}$  (2 mL) were added in a sealed tube (20 mL) under argon atmosphere and the reaction mixture was stirred at corresponding temperature for 20 h.

<sup>b</sup>The yields were determined by HPLC using **2a** as the external standard ( $t_R = 7.5$  min,  $\lambda_{\text{max}} = 229.9$  nm, water / acetonitrile = 50 : 50 (v / v)).

**Table S6 Screening of Reaction Time <sup>a</sup>**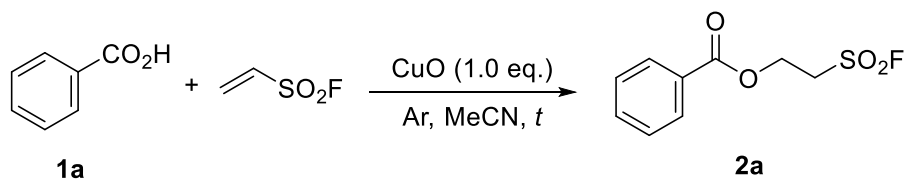

| Entry    | Time (h)  | Conversion ( <b>1a</b> , %) | Yield ( <b>2a</b> , %) <sup>b</sup> |
|----------|-----------|-----------------------------|-------------------------------------|
| 1        | 5         | 20                          | N.D.                                |
| 2        | 8         | 33                          | 17                                  |
| 3        | 15        | 81                          | 73                                  |
| 4        | 18        | 94                          | 84                                  |
| <b>5</b> | <b>20</b> | <b>95</b>                   | <b>90</b>                           |
| 6        | 24        | 96                          | 88                                  |
| 7        | 36        | 94                          | 85                                  |
| 8        | 48        | 90                          | 89                                  |

<sup>a</sup>Reaction condition: Benzoic acid (**1a**, 0.1 mmol), ESF (2.0 eq., 0.2 mmol),  $\text{CuO}$  (1.0 eq., 8 mg), anhydrous  $\text{CH}_3\text{CN}$  (2 mL) were added in a sealed tube (20 mL) under argon atmosphere and the reaction mixture was stirred at 80 °C for corresponding reaction time.

<sup>b</sup>The yields were determined by HPLC using **2a** as the external standard ( $t_R = 7.5$  min,  $\lambda_{\text{max}} = 229.9$  nm, water / acetonitrile = 50 : 50 (v / v)).

**Table S7 Reaction Optimization <sup>a</sup>**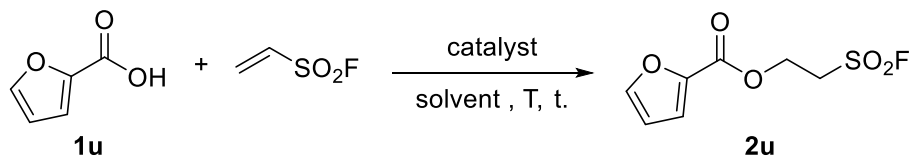

| Entry          | Catalyst (X eq.)        | Solvent     | Conversion ( <b>1u</b> , %) | Yield ( <b>2u</b> , %) <sup>b</sup> |
|----------------|-------------------------|-------------|-----------------------------|-------------------------------------|
| <b>1</b>       | <b>CuO (1.0)</b>        | <b>MeCN</b> | <b>80</b>                   | <b>56</b>                           |
| 2              | CuO (1.0)               | DMA         | 0                           | 0                                   |
| 3              | CuF <sub>2</sub> (1.0)  | MeCN        | 19                          | 11                                  |
| 4 <sup>c</sup> | CuO (1.0)               | MeCN        | 34                          | 23                                  |
| 5              | CuSO <sub>4</sub> (1.0) | MeCN        | 0                           | 0                                   |
| 6              | CuO (1.5)               | MeCN        | 39                          | 34                                  |
| 7 <sup>d</sup> | CuO (1.0)               | MeCN        | 12                          | 10                                  |
| 8 <sup>e</sup> | CuO (1.0)               | DMA         | 4                           | 2                                   |

<sup>a</sup>Reaction condition: Furan-2-carboxylic acid (**1u**, 0.1 mmol), ESF (2.0 eq., 0.2 mmol), [Cu] catalyst, anhydrous solvent (2 mL) were added in a sealed tube (20 mL) under argon atmosphere and the reaction mixture was stirred at 80 °C for 20 h. <sup>b</sup>The yields were determined by HPLC using **2u** as the external standard ( $t_R = 4.9$  min,  $\lambda_{max} = 254.7$  nm, water / acetonitrile = 50 : 50 (v / v)). <sup>c</sup>Reacted for 24 h. <sup>d</sup>ESF 1.2 eq., 0.12 mmol, <sup>e</sup>Reacted at 100 °C.



**Table S8 Reaction Optimization<sup>a</sup>**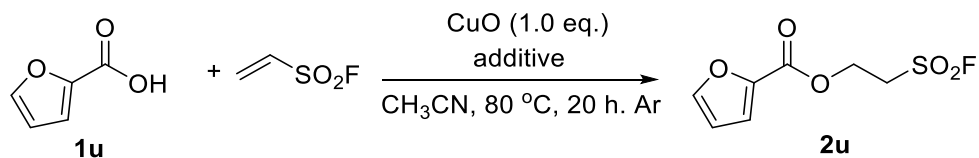

| Entry    | Additive | (mol%)   | Conversion ( <b>1u</b> , %) | Yield ( <b>2u</b> , %) <sup>b</sup> |
|----------|----------|----------|-----------------------------|-------------------------------------|
| 1        | A        | 10       | 80                          | 66                                  |
| 2        | B        | 10       | 84                          | 76                                  |
| 3        | C        | 10       | 84                          | 53                                  |
| 4        | B        | 15       | 87                          | 77                                  |
| <b>5</b> | <b>B</b> | <b>5</b> | <b>89</b>                   | <b>78</b>                           |
| 6        | B        | 2        | 85                          | 65                                  |
| 7        | B        | 0        | 79                          | 57                                  |

<sup>a</sup>Reaction condition: Furan-2-carboxylic acid (**1u**, 0.1 mmol), ESF (2.0 eq., 0.2 mmol), CuO (1.0 eq., 8 mg), additive (mol%), anhydrous CH<sub>3</sub>CN (2 mL) were added in a sealed tube (20 mL) under argon atmosphere and the reaction mixture was stirred at 80 °C for 20 h. <sup>b</sup>The yields were determined by HPLC using **2u** as the external standard (*t<sub>R</sub>* = 4.9 min, λ<sub>max</sub> = 254.7 nm, water / acetonitrile = 50 : 50 (v / v)). **A** = [RuCl<sub>2</sub>(p-cymene)]<sub>2</sub>, **B** = Ru(bpy)<sub>3</sub>(PF<sub>6</sub>)<sub>2</sub>, **C** = Ru(bpy)<sub>3</sub>Cl<sub>2</sub>.

## 2. Deuterated experiment

The starting material deuterated benzoic acid (*d-1a*) was synthesized according to the previous literature report.<sup>[1]</sup>

**(carboxy-d)benzene (*d-1a*)**. Off-white solid, <sup>1</sup>H NMR (500 MHz, CDCl<sub>3</sub>) δ 11.47 (br s, 0.48 H), 8.14 (d, *J* = 7.2 Hz, 2H), 7.63 (t, *J* = 6.9 Hz, 1H), 7.49 (t, *J* = 7.2 Hz, 2H).

**2-(fluorosulfonyl)ethyl-2-d benzoate (*d-2a*)**. Procedure A was followed, petroleum ether / ethyl acetate = 10 : 1 (v / v) as eluent for column chromatography. Yellow oil. <sup>1</sup>H NMR (500 MHz, CDCl<sub>3</sub>) δ 8.05 (d, *J* = 7.9 Hz, 2H), 7.61 (t, *J* = 7.4 Hz, 1H), 7.47 (t, *J* = 7.5 Hz, 2H), 4.81 (t, *J* = 5.1 Hz, 2H), 3.85 (q, *J* = 4.9 Hz, 1.4 H). <sup>19</sup>F NMR (471 MHz, CDCl<sub>3</sub>) δ 59.05 (s), 59.01 (s).

The starting material benzoic acid with deuteration rate of 52% (*d-1a*) was carried out in control experiment, which observed the deuteration rate of 30% in isolated product (*d-2a*). Subsequent results were also verified by <sup>1</sup>H-NMR and <sup>19</sup>F-NMR. The deuterated experiment also proved this type reaction was oxa-Michael addition.

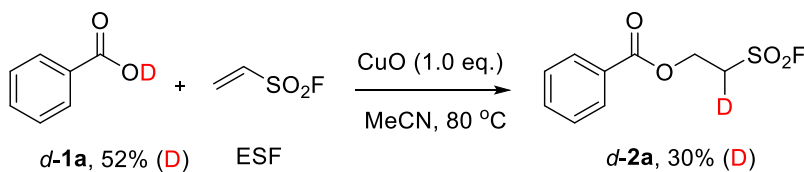

[1] C.; Empel, T. V.; Nguyen, Rene M. Koenigs, Tropylium-Catalyzed O-H insertion reactions of diazoalkanes with carboxylic acids, *Org. Lett.* **2021**, 23, 548.

### 3. NMR spectra

**2a**,  $^1\text{H}$  NMR, 500 MHz,  $\text{CDCl}_3$

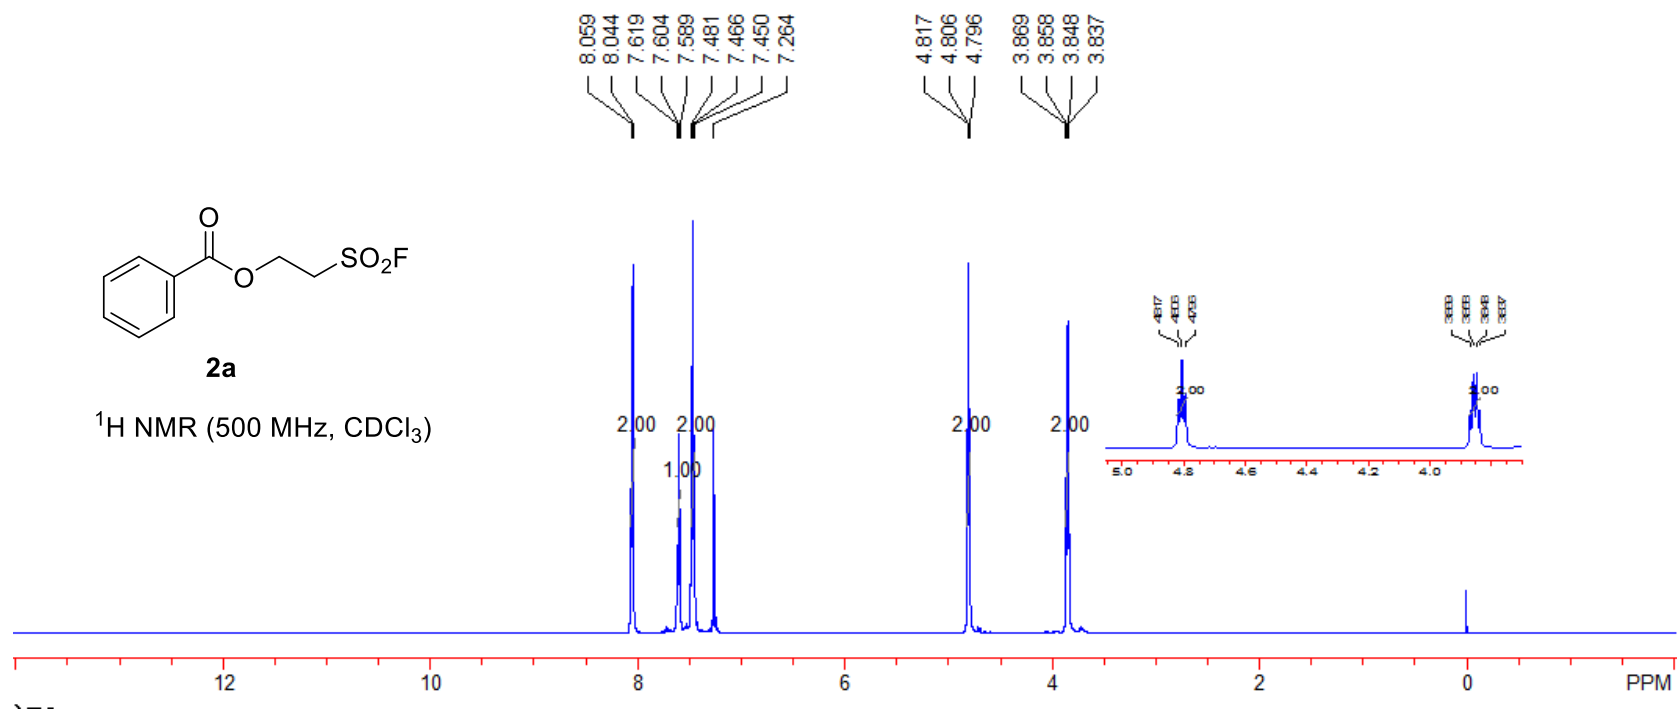

**Figure S1.** The  $^1\text{H}$  NMR spectrum of **2a**

**2a**,  $^{13}\text{C}$  NMR, 126 MHz,  $\text{CDCl}_3$

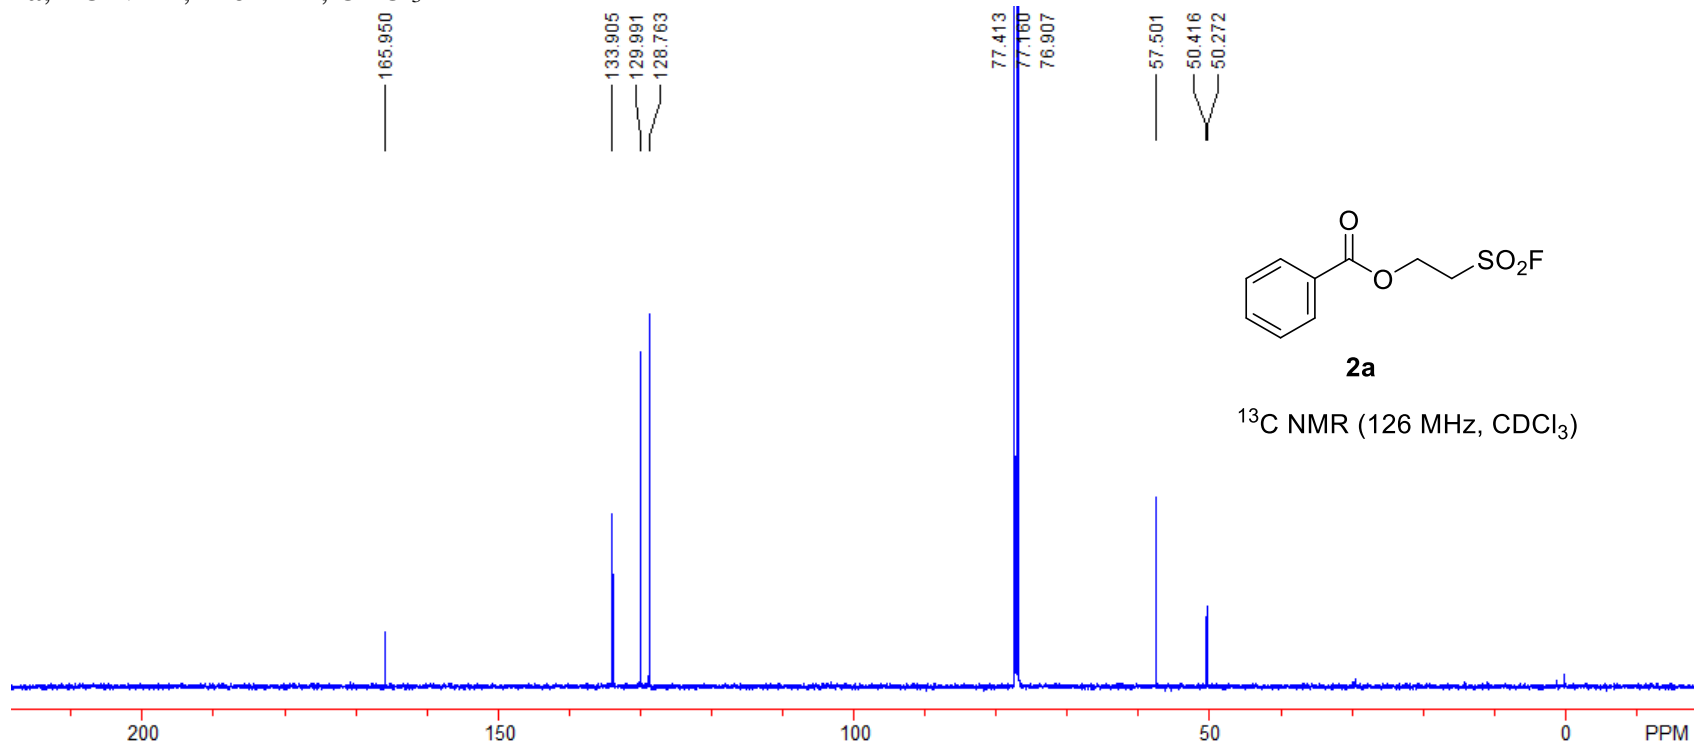

**Figure S2.** The  $^{13}\text{C}$  NMR spectrum of **2a**

**2a**,  $^{19}\text{F}$  NMR, 471 MHz,  $\text{CDCl}_3$

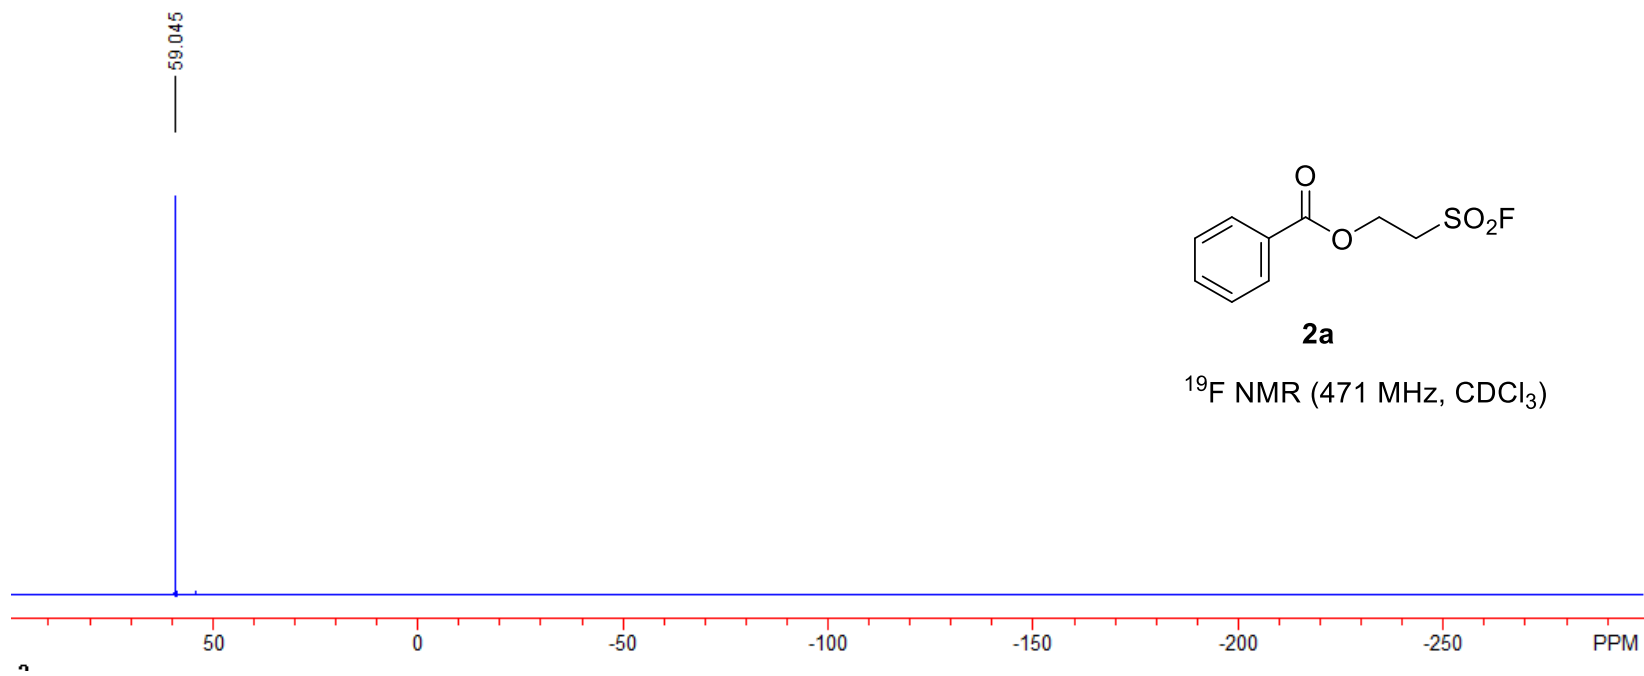

**Figure S3.** The  $^{19}\text{F}$  NMR spectrum of **2a**

**2b**,  $^1\text{H}$  NMR, 500 MHz,  $\text{CDCl}_3$

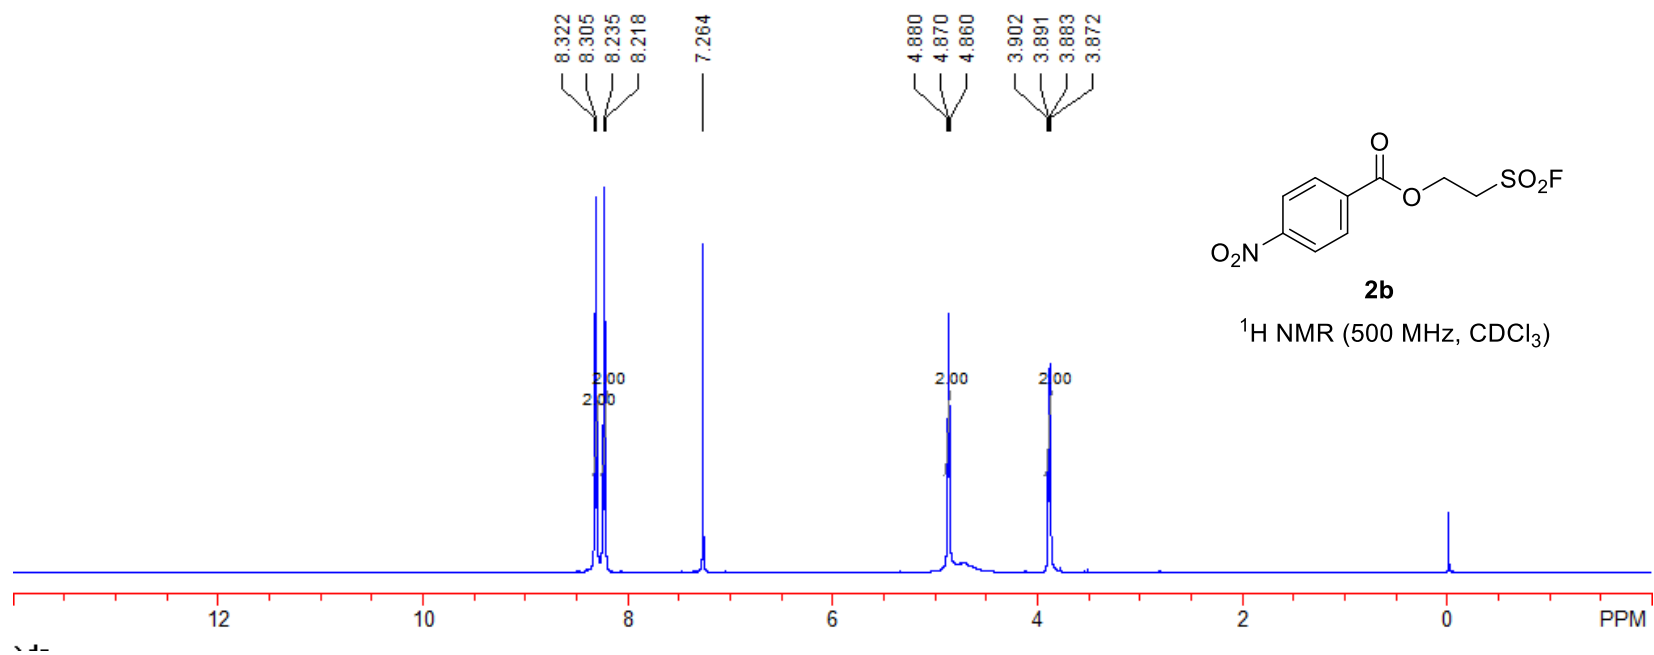

**Figure S4.** The  $^1\text{H}$  NMR spectrum of **2b**

**2b**,  $^{13}\text{C}$  NMR, 126 MHz,  $\text{CDCl}_3$

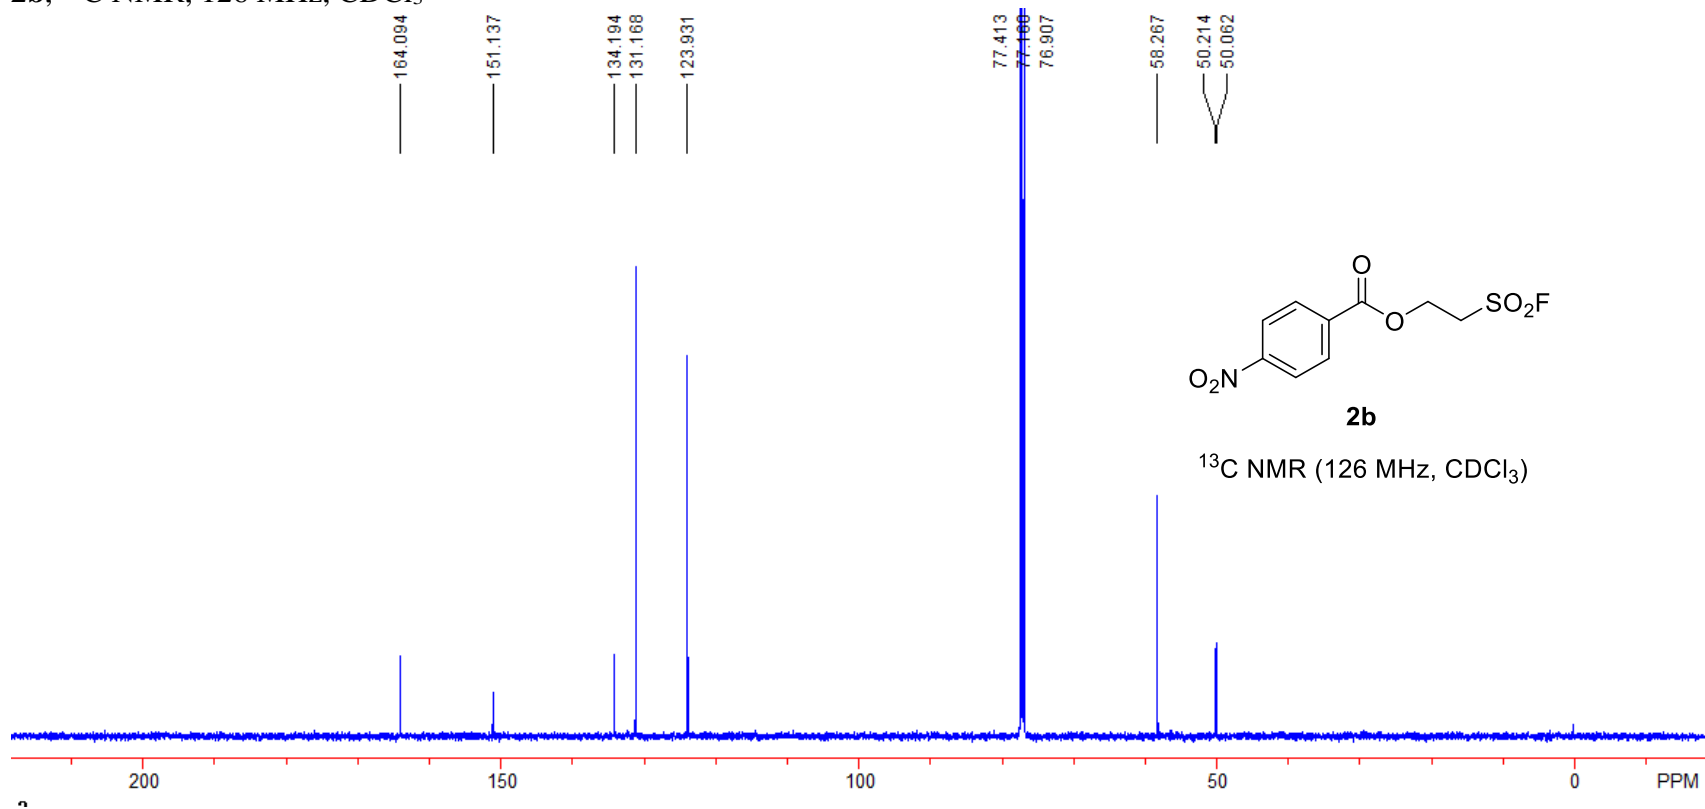

**Figure S5.** The  $^{13}\text{C}$  NMR spectrum of **2b**

**2b**,  $^{19}\text{F}$  NMR, 471 MHz,  $\text{CDCl}_3$

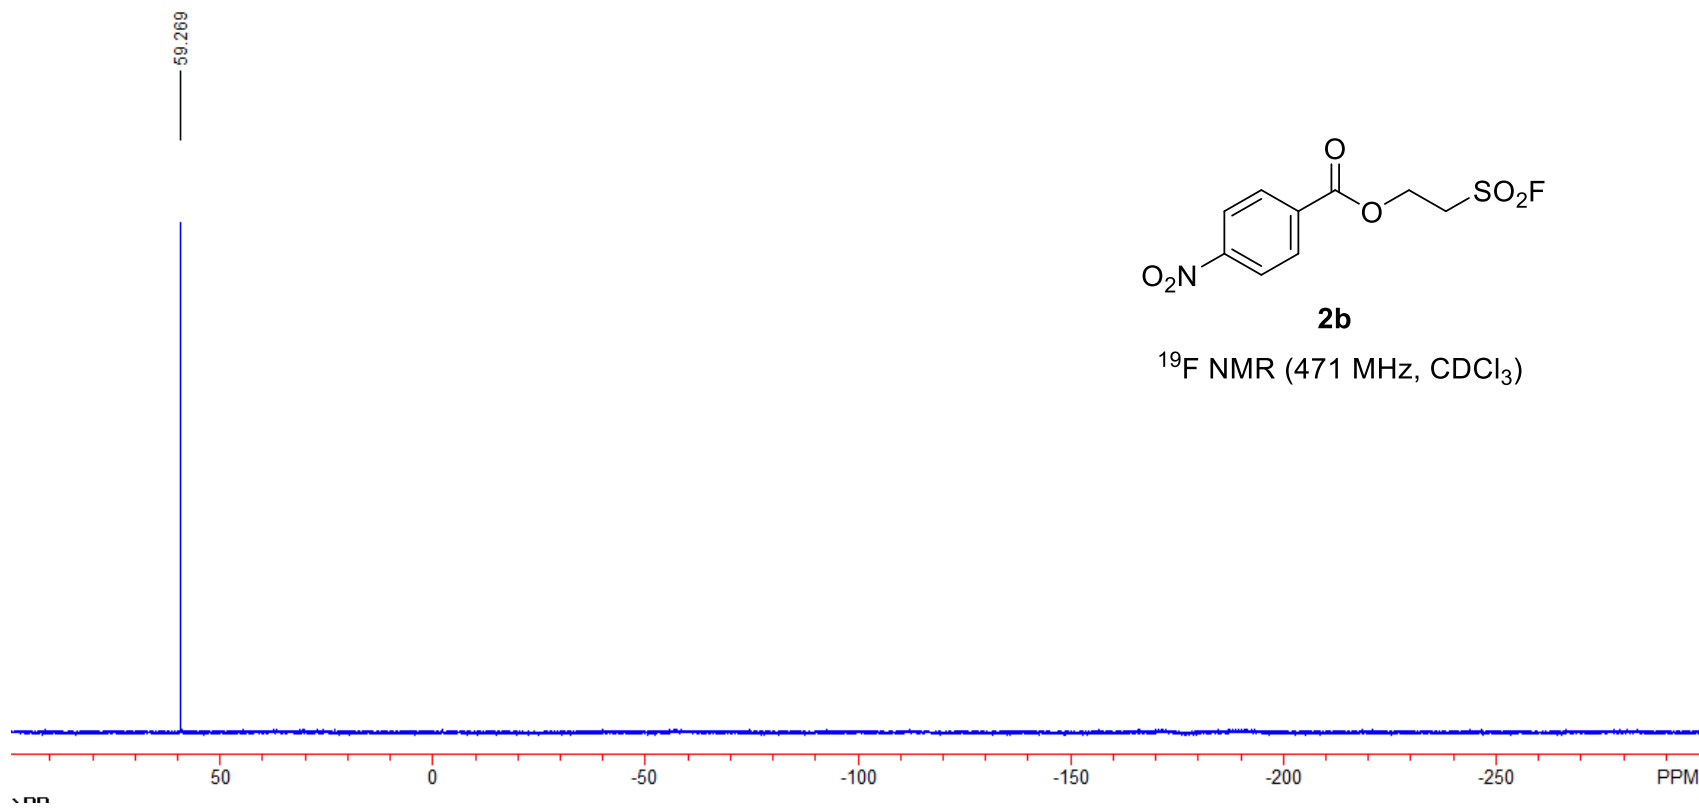

**Figure S6.** The  $^{19}\text{F}$  NMR spectrum of **2b**



**2c**,  $^1\text{H}$  NMR, 500 MHz,  $\text{CDCl}_3$

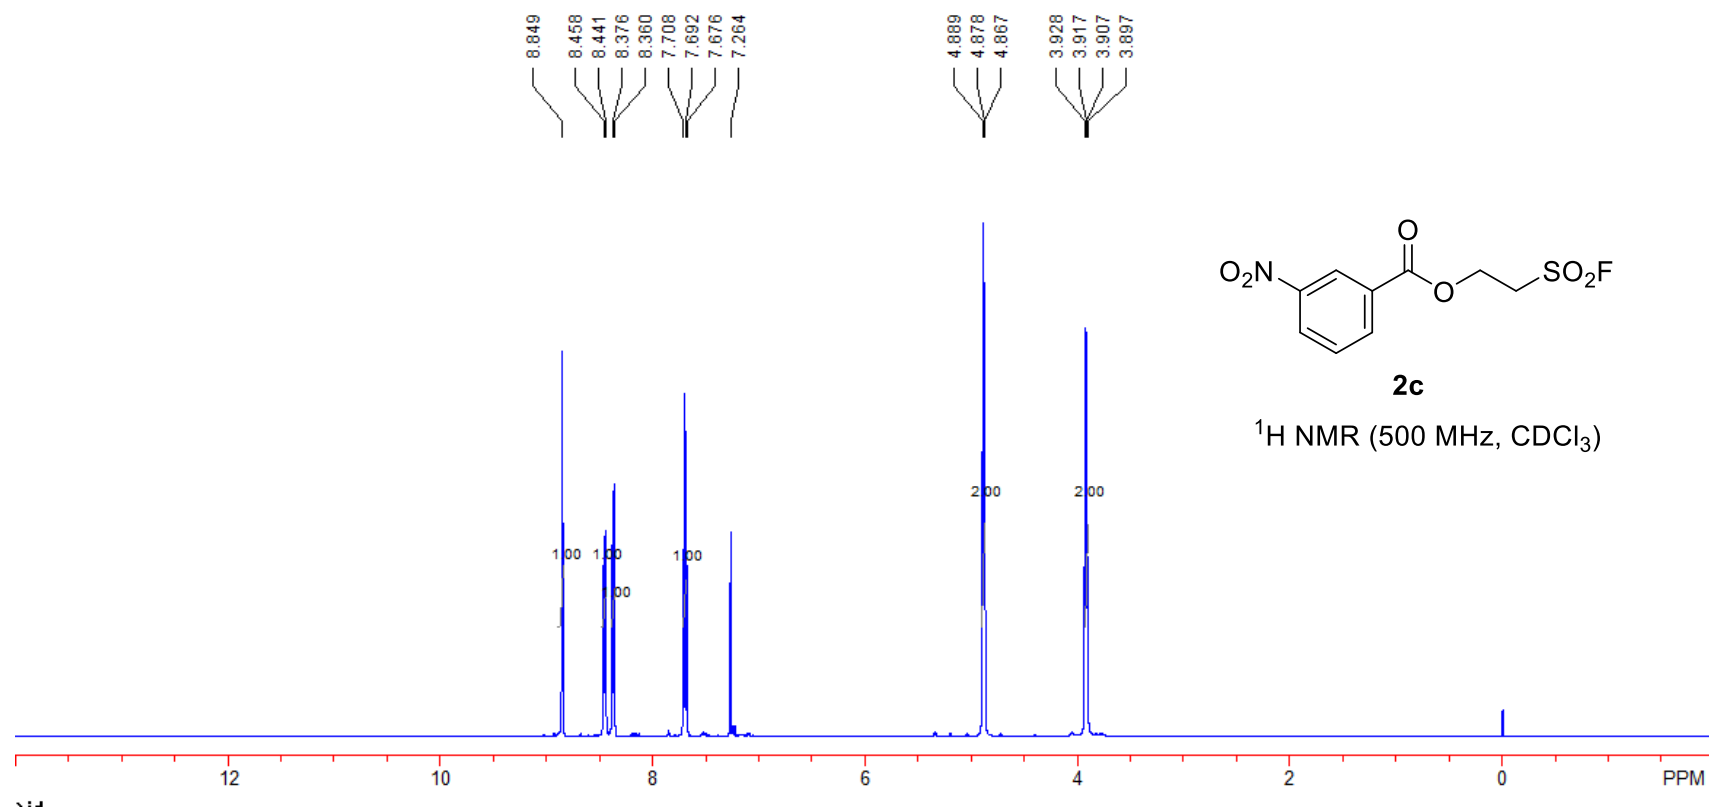

**Figure S7.** The  $^1\text{H}$  NMR spectrum of **2c**

**2c**,  $^{13}\text{C}$  NMR, 126 MHz,  $\text{CDCl}_3$

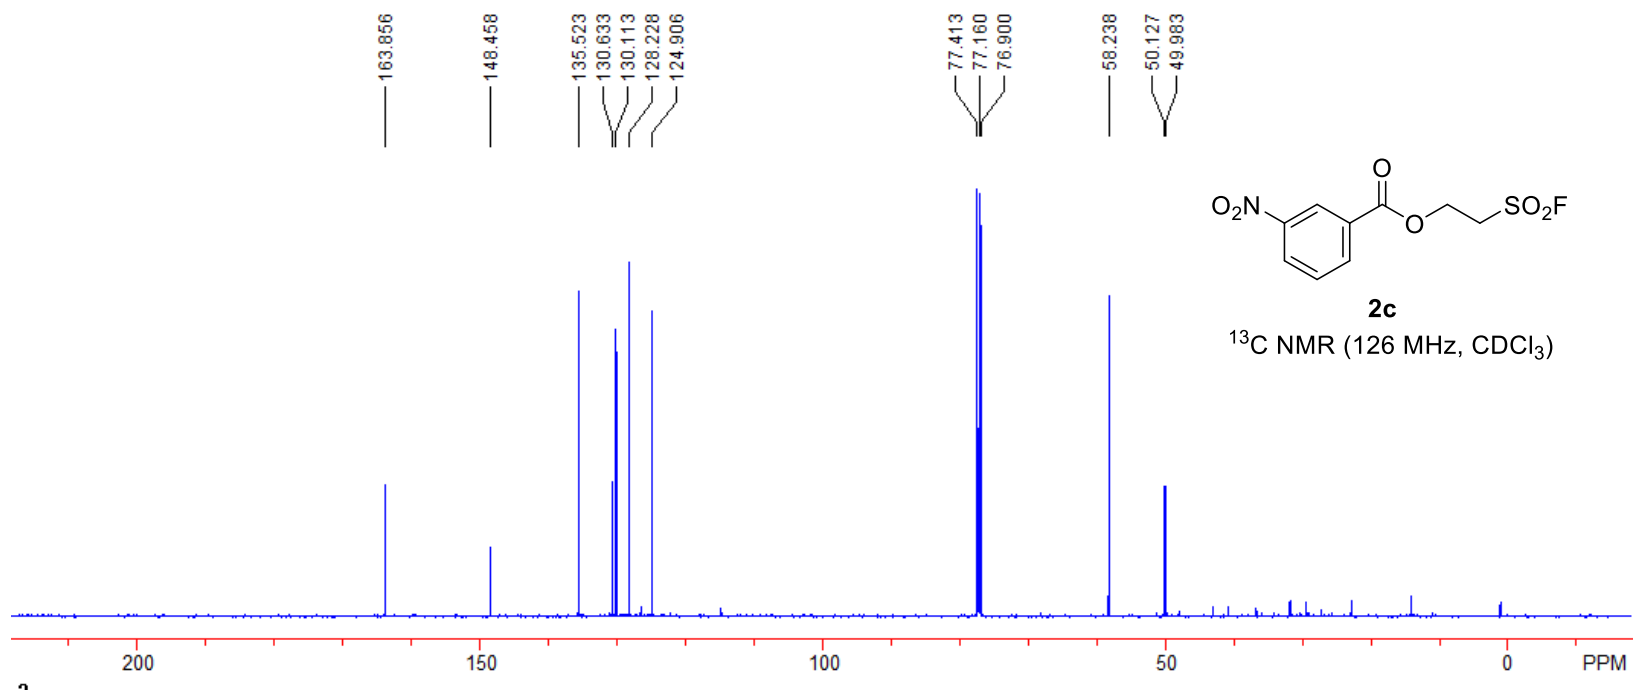

**Figure S8.** The  $^{13}\text{C}$  NMR spectrum of **2c**

**2c**,  $^{19}\text{F}$  NMR, 471 MHz,  $\text{CDCl}_3$

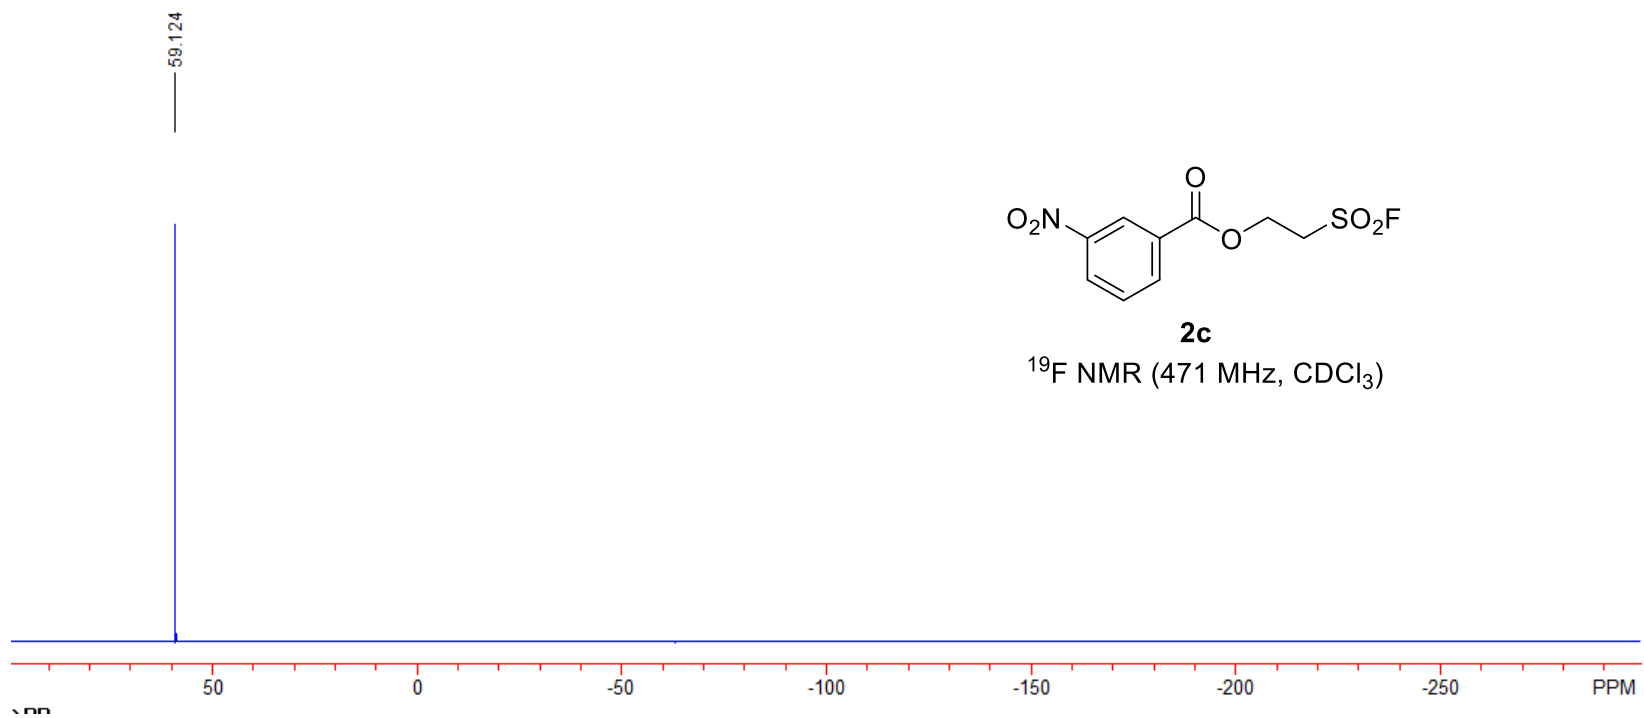

**Figure S9.** The  $^{19}\text{F}$  NMR spectrum of **2c**

**2d**,  $^1\text{H}$  NMR, 500 MHz,  $\text{CDCl}_3$

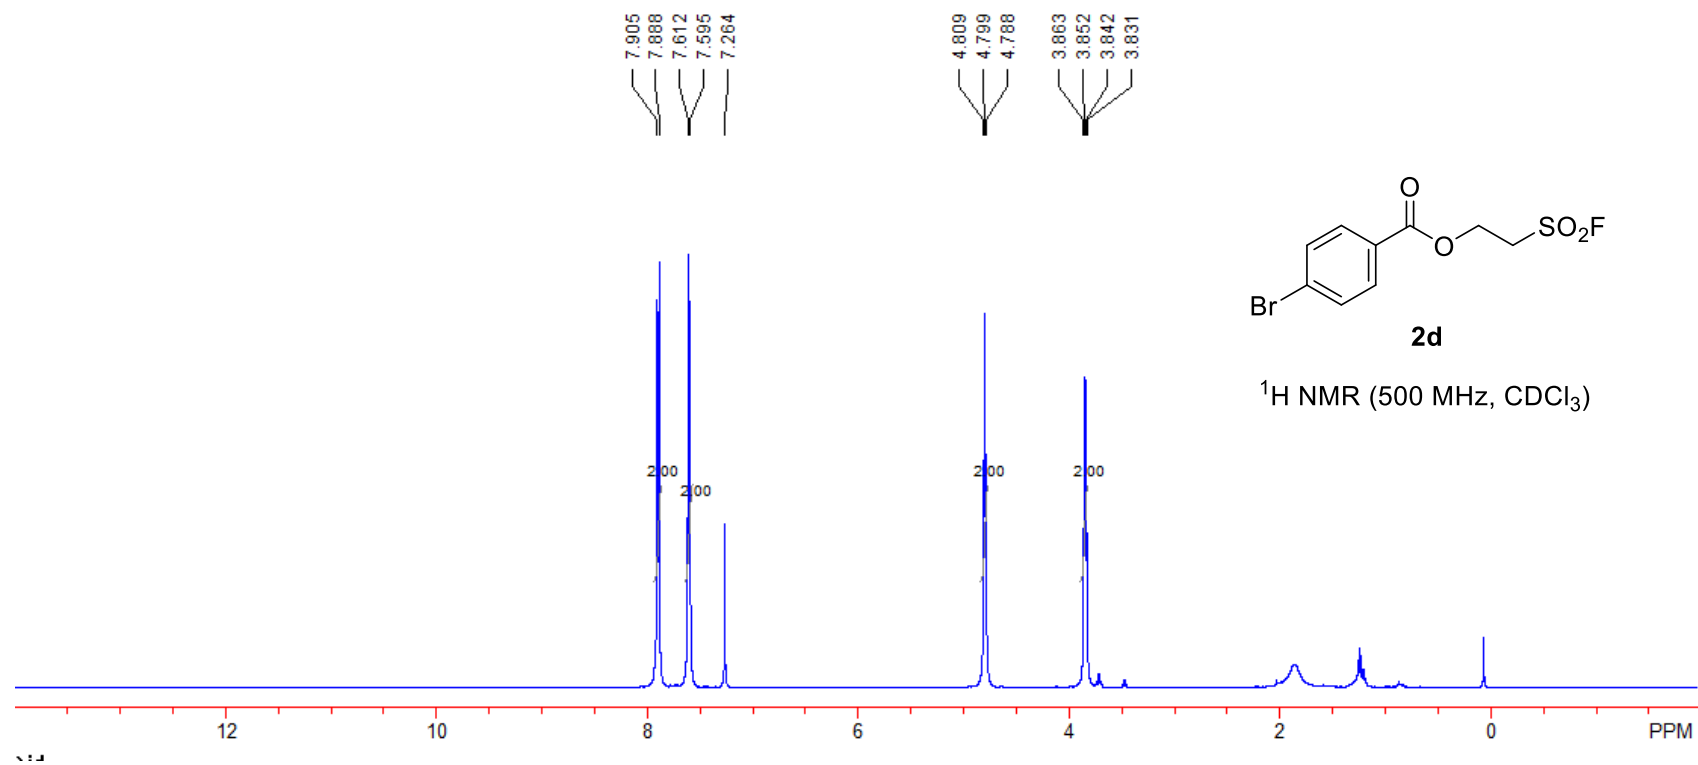

**Figure S10.** The  $^1\text{H}$  NMR spectrum of **2d**

**2d**,  $^{13}\text{C}$  NMR, 126 MHz,  $\text{CDCl}_3$

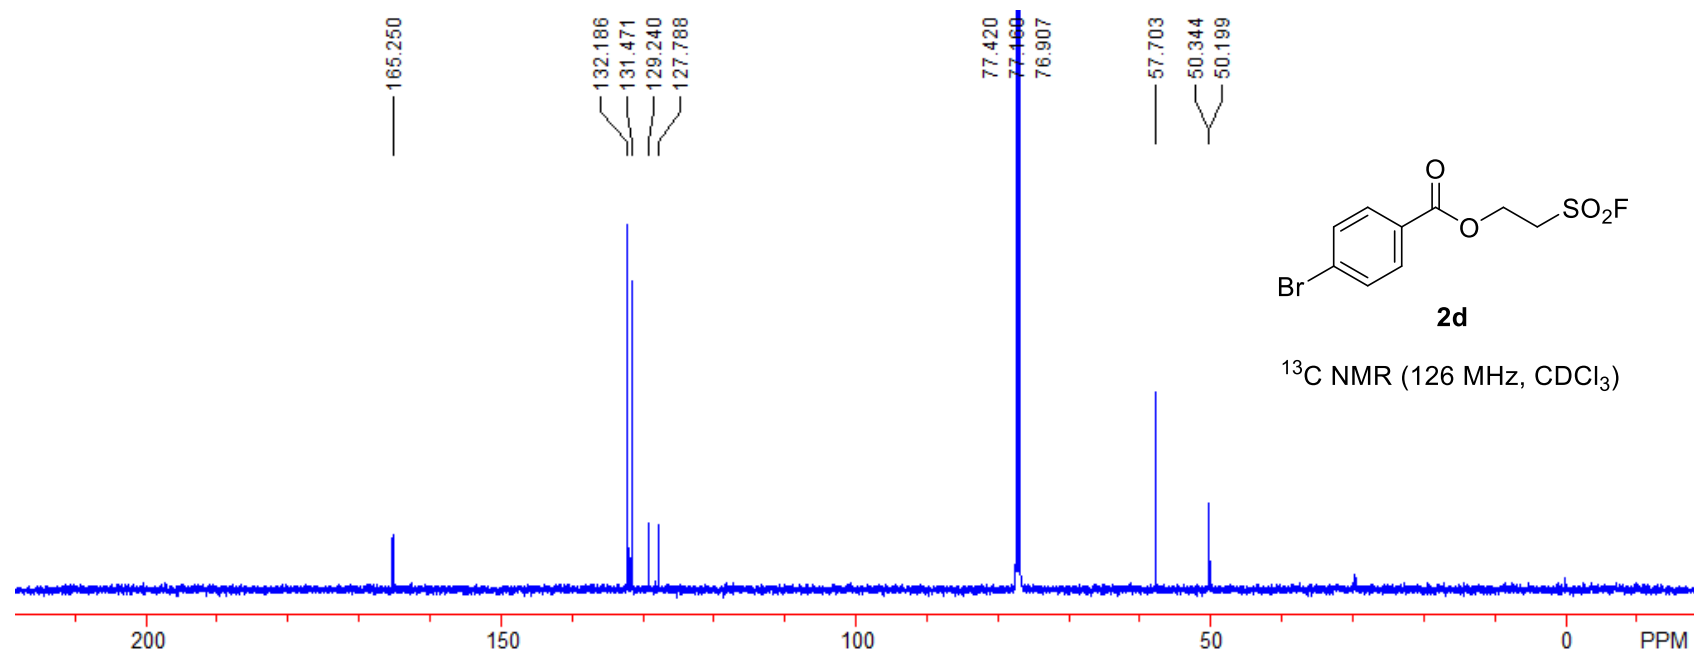

**Figure S11.** The  $^{13}\text{C}$  NMR spectrum of **2d**

**2d**,  $^{19}\text{F}$  NMR, 471 MHz,  $\text{CDCl}_3$

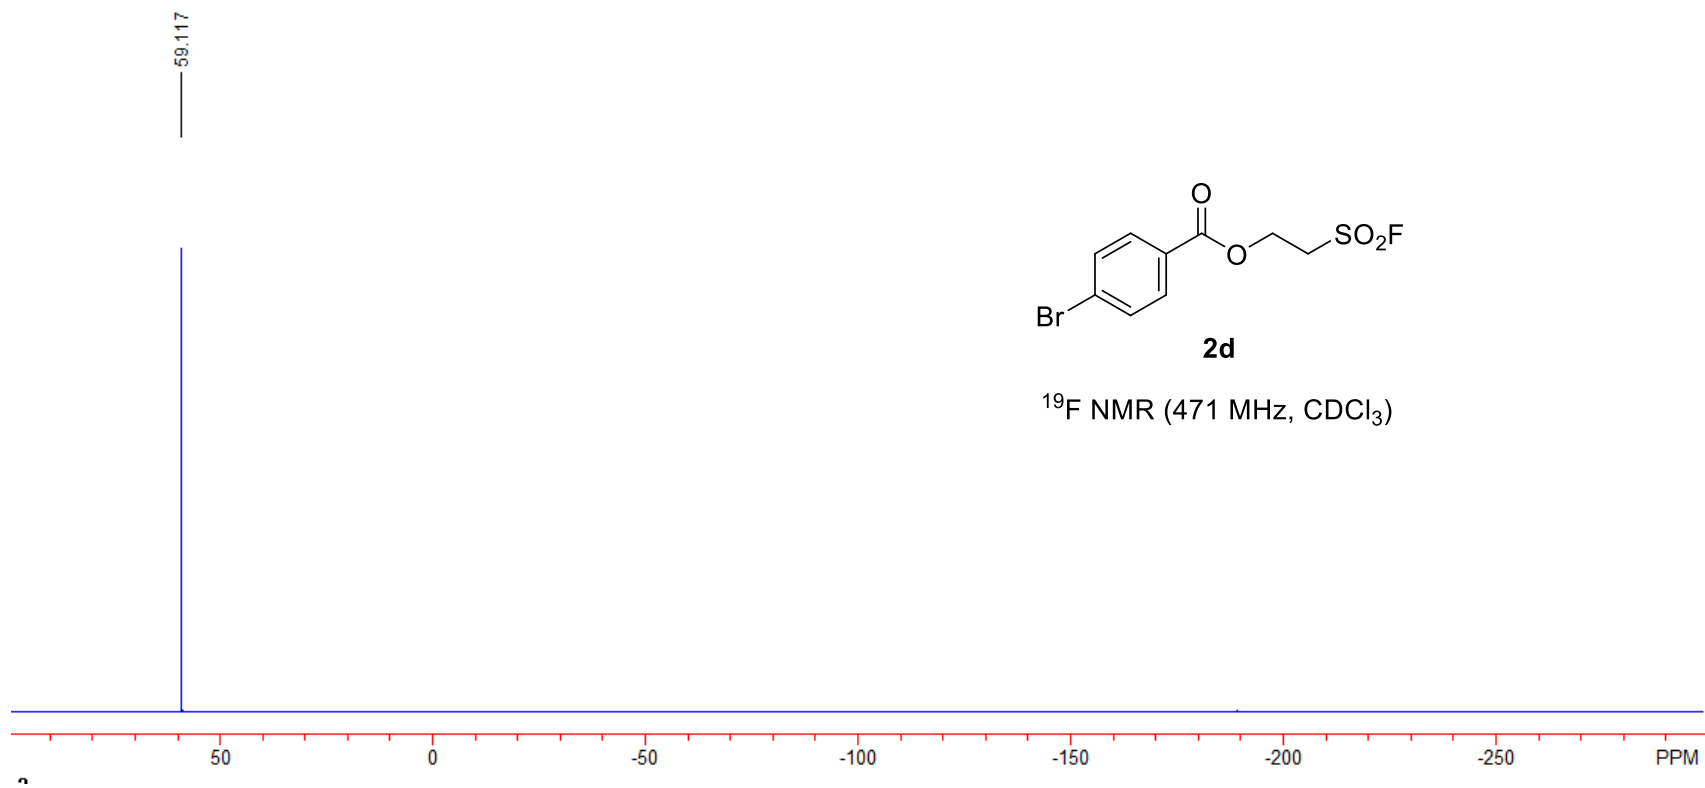

**Figure S12.** The  $^{19}\text{F}$  NMR spectrum of **2d**

**2e**,  $^1\text{H}$  NMR, 500 MHz,  $\text{CDCl}_3$

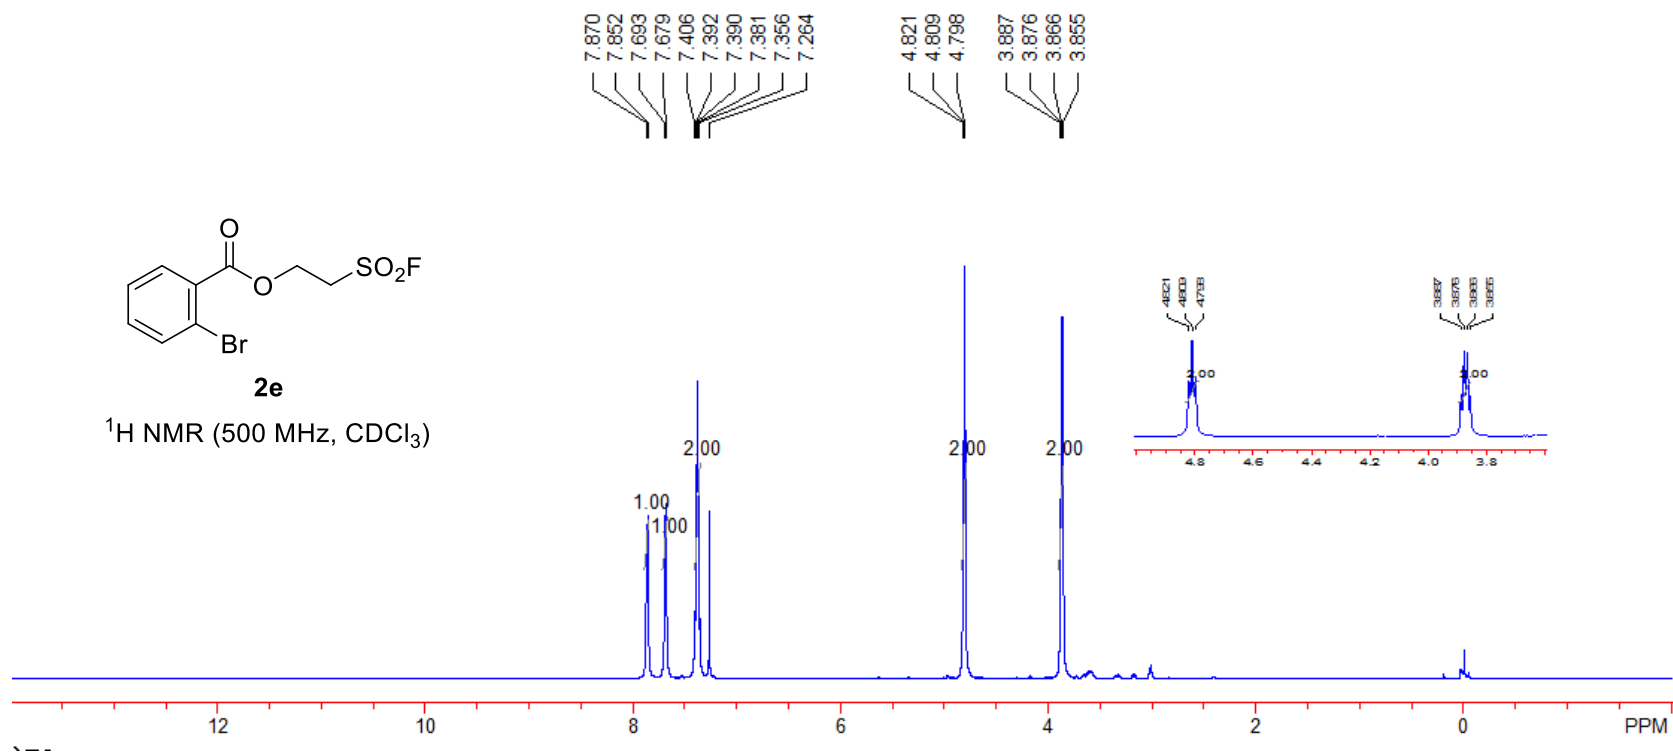

**Figure S13.** The  $^1\text{H}$  NMR spectrum of **2e**

**2e**,  $^{13}\text{C}$  NMR, 126 MHz,  $\text{CDCl}_3$

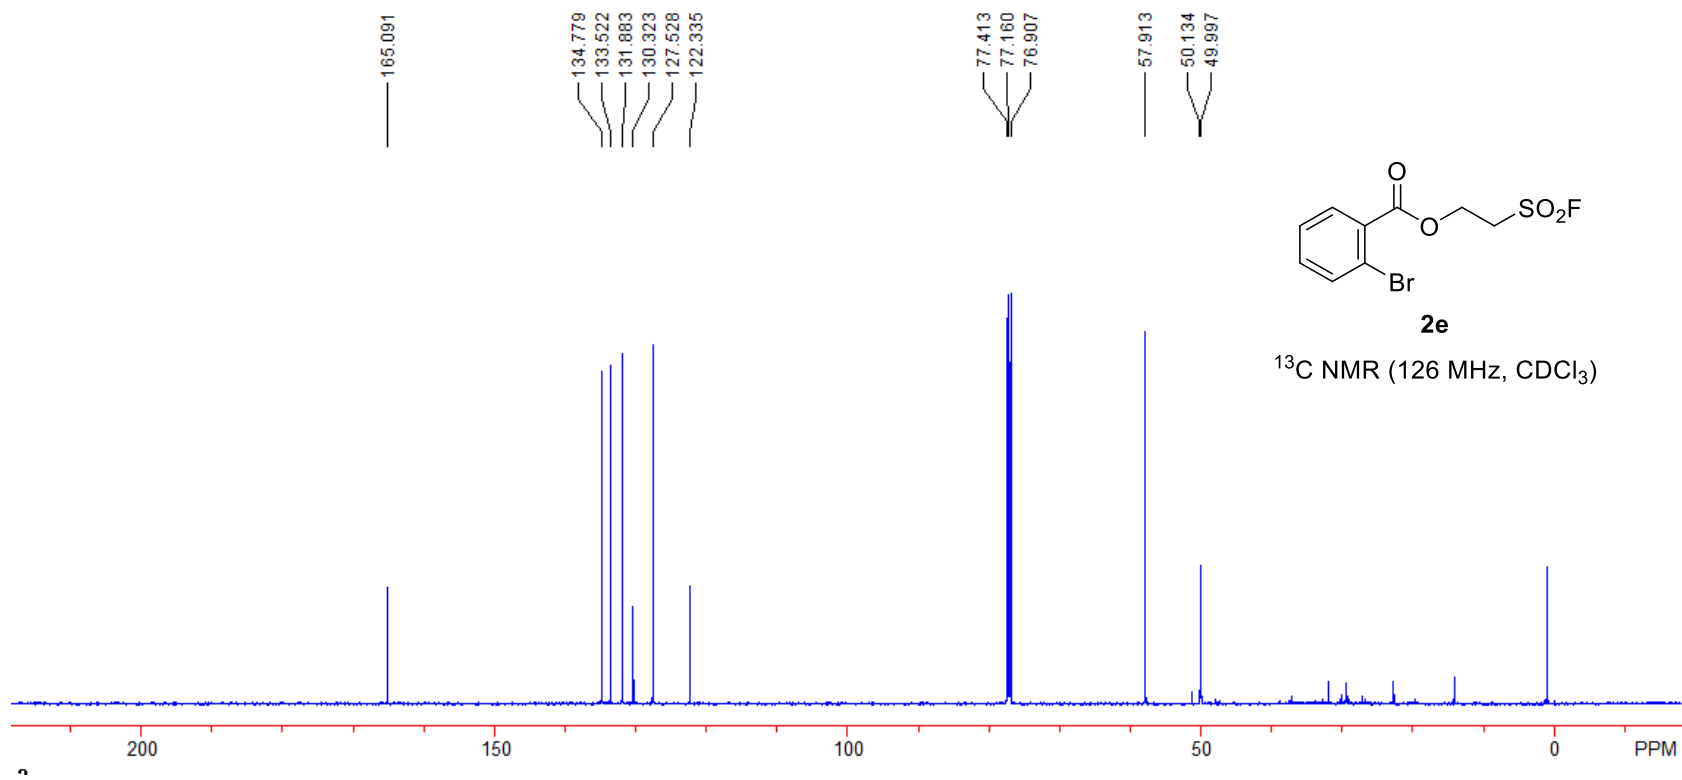

**Figure S14.** The  $^{13}\text{C}$  NMR spectrum of **2e**



**2e**,  $^{19}\text{F}$  NMR, 471 MHz,  $\text{CDCl}_3$

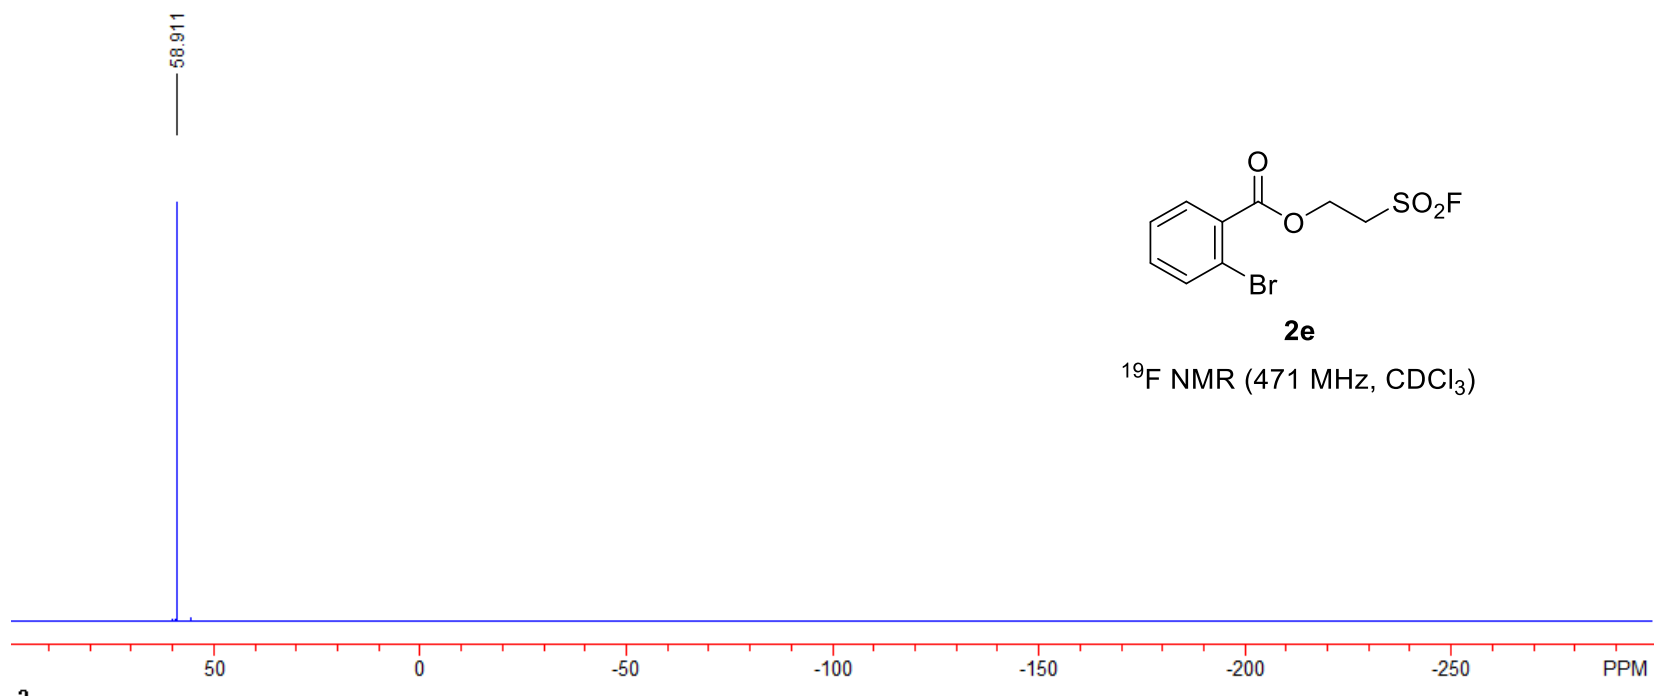

**Figure S15.** The  $^{19}\text{F}$  NMR spectrum of **2e**

**2f**,  $^1\text{H}$  NMR, 500 MHz,  $\text{CDCl}_3$

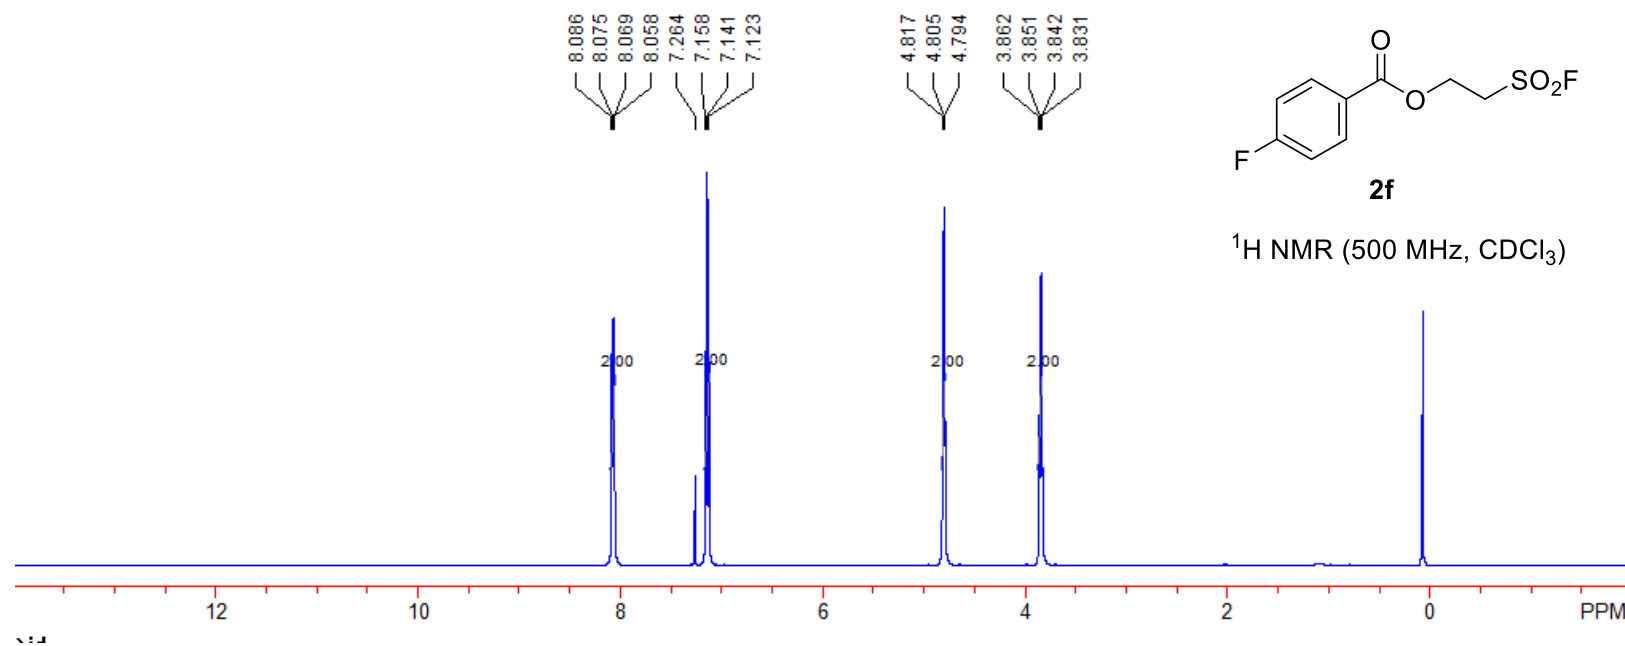

**Figure S16.** The  $^1\text{H}$  NMR spectrum of **2f**

**2f**,  $^{13}\text{C}$  NMR, 126 MHz,  $\text{CDCl}_3$

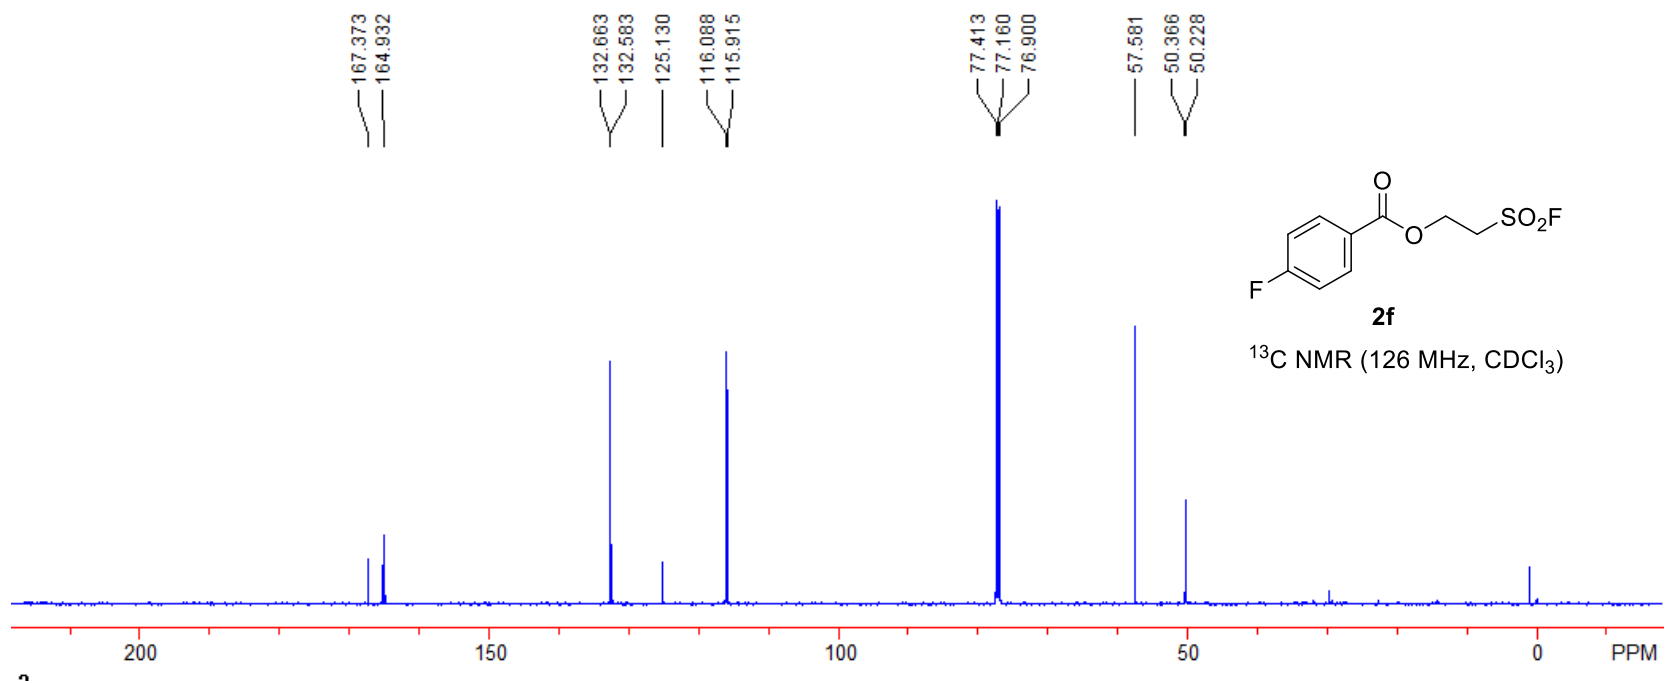

**Figure S17.** The  $^{13}\text{C}$  NMR spectrum of **2f**

**2f**,  $^{19}\text{F}$  NMR, 471 MHz,  $\text{CDCl}_3$

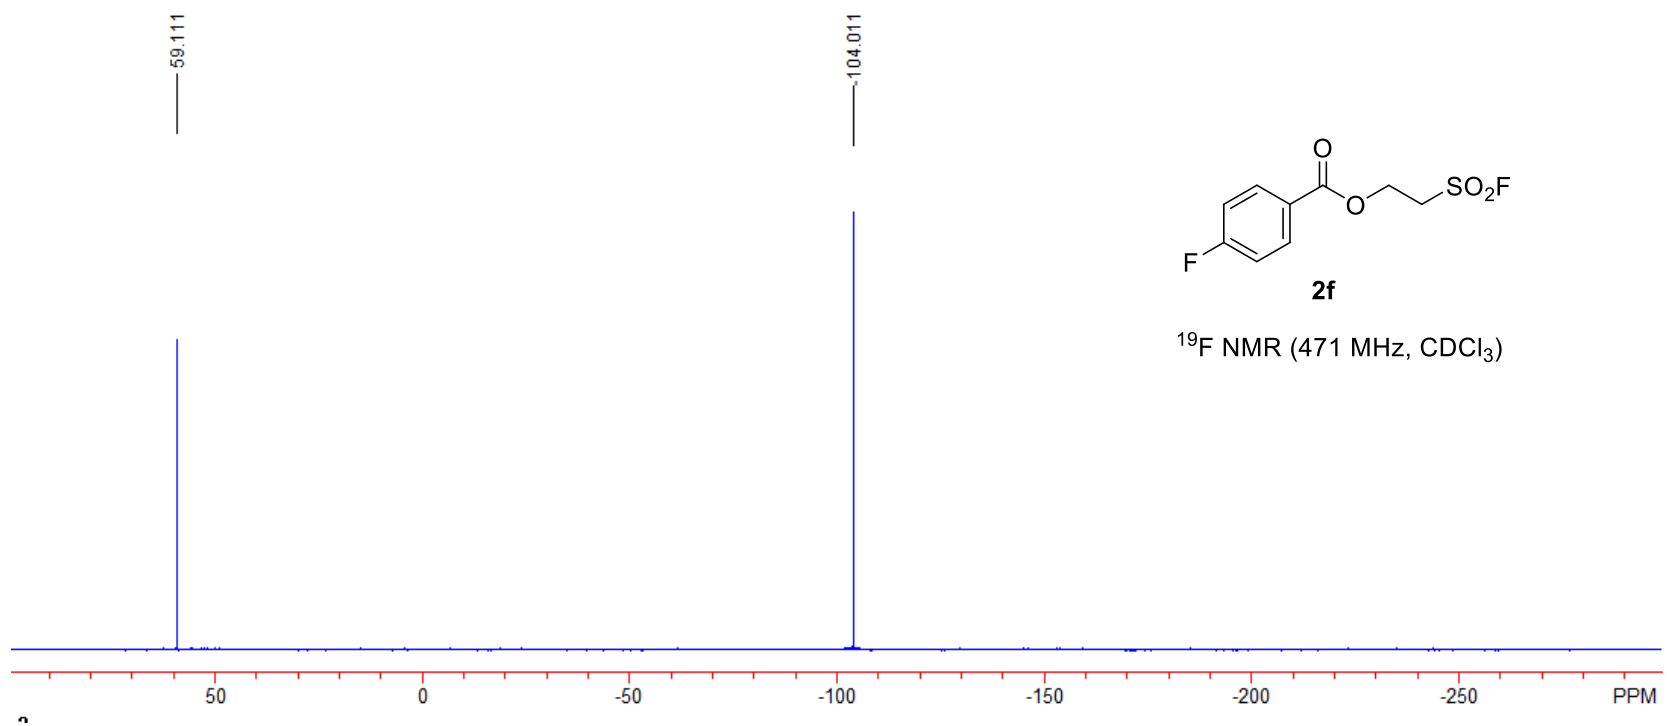

**Figure S18.** The  $^{19}\text{F}$  NMR spectrum of **2f**

**2g**,  $^1\text{H}$  NMR, 500 MHz,  $\text{CDCl}_3$

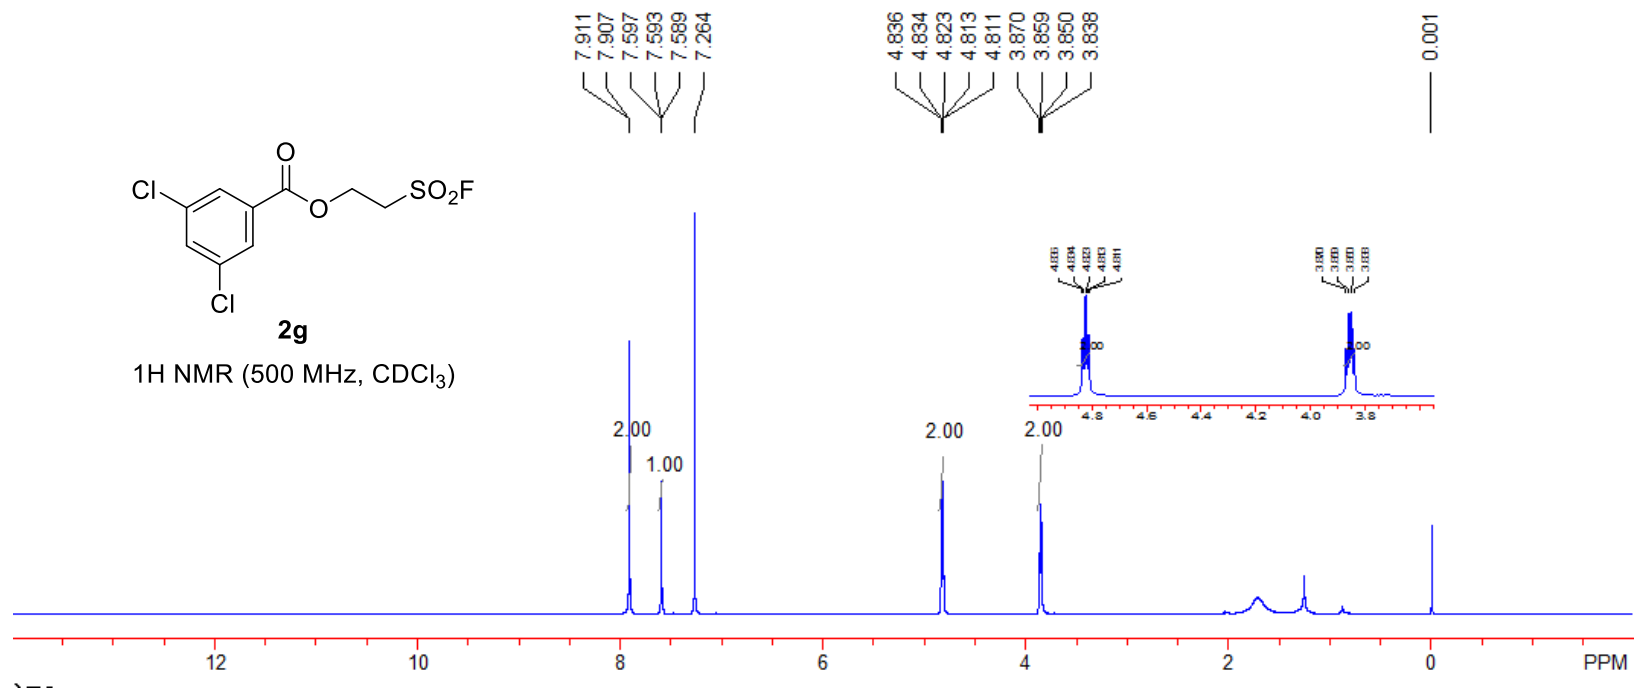

**Figure S19.** The  $^1\text{H}$  NMR spectrum of **2g**

**2g**,  $^{13}\text{C}$  NMR, 126 MHz,  $\text{CDCl}_3$

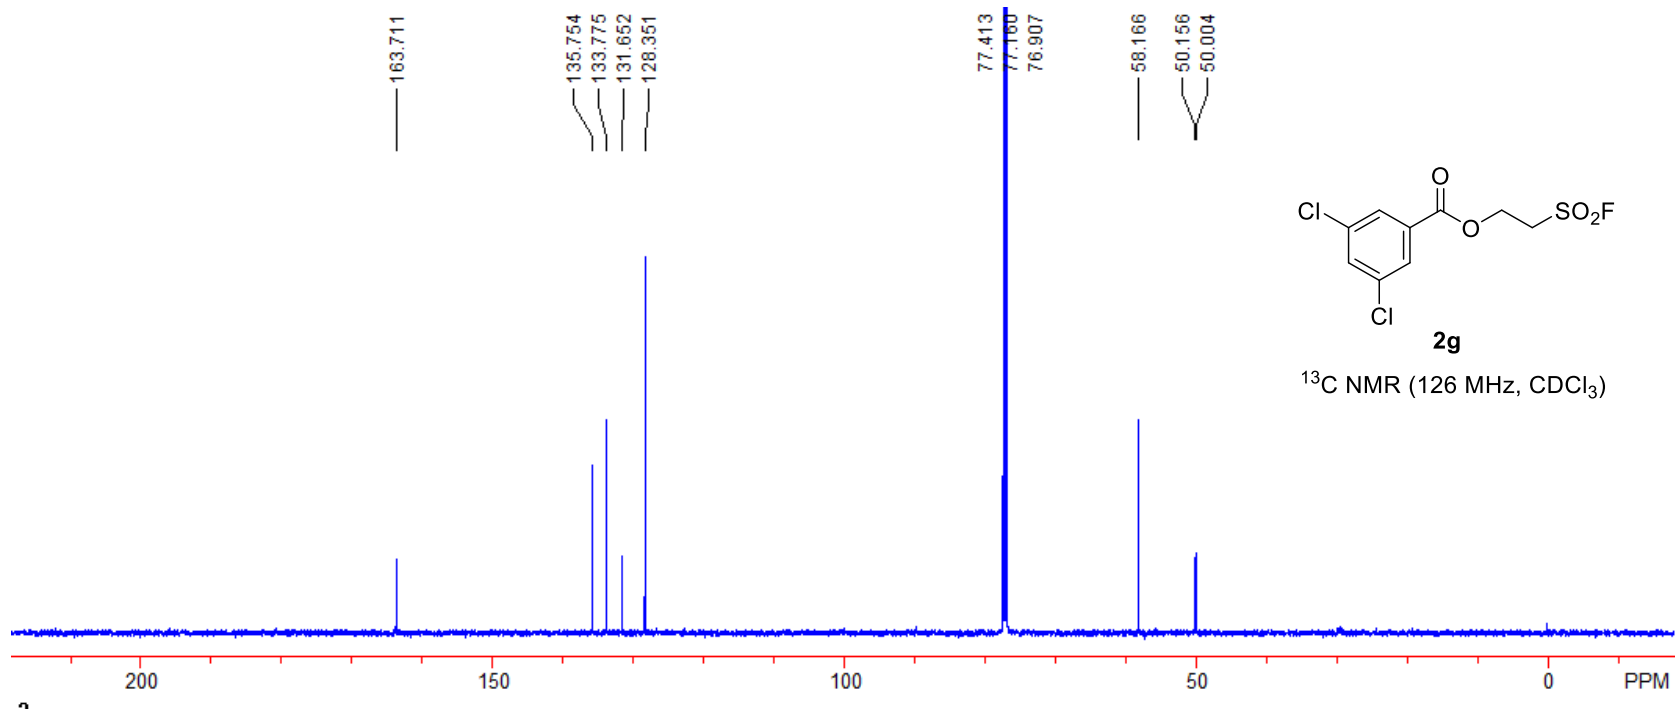

**Figure S20.** The  $^{13}\text{C}$  NMR spectrum of **2g**

**2g**,  $^{19}\text{F}$  NMR, 471 MHz,  $\text{CDCl}_3$

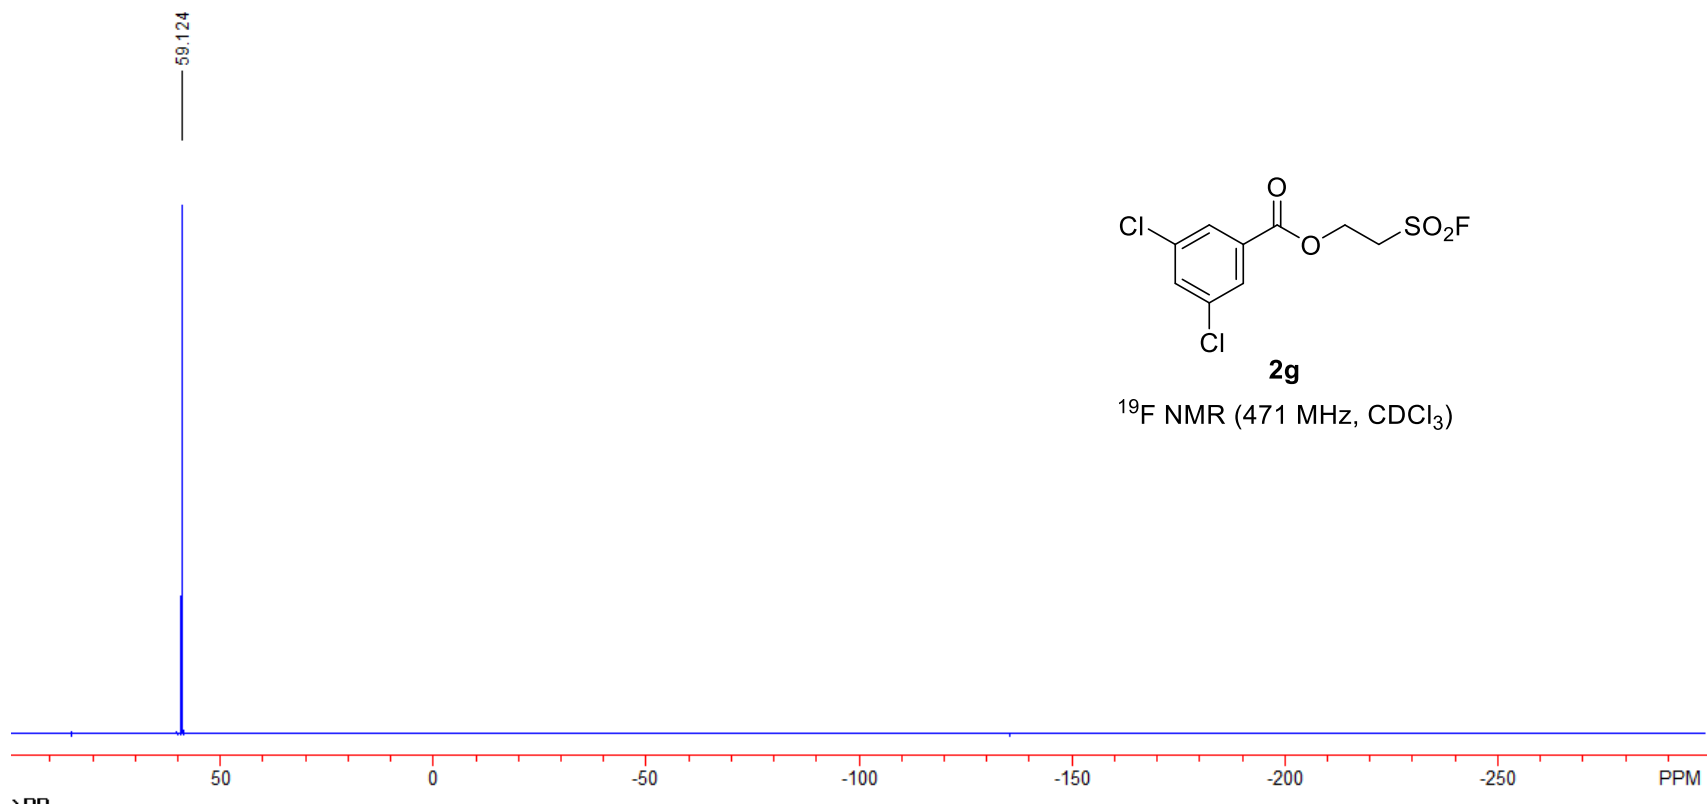

**Figure S21.** The  $^{19}\text{F}$  NMR spectrum of **2g**

**2h**,  $^1\text{H}$  NMR, 500 MHz,  $\text{CDCl}_3$

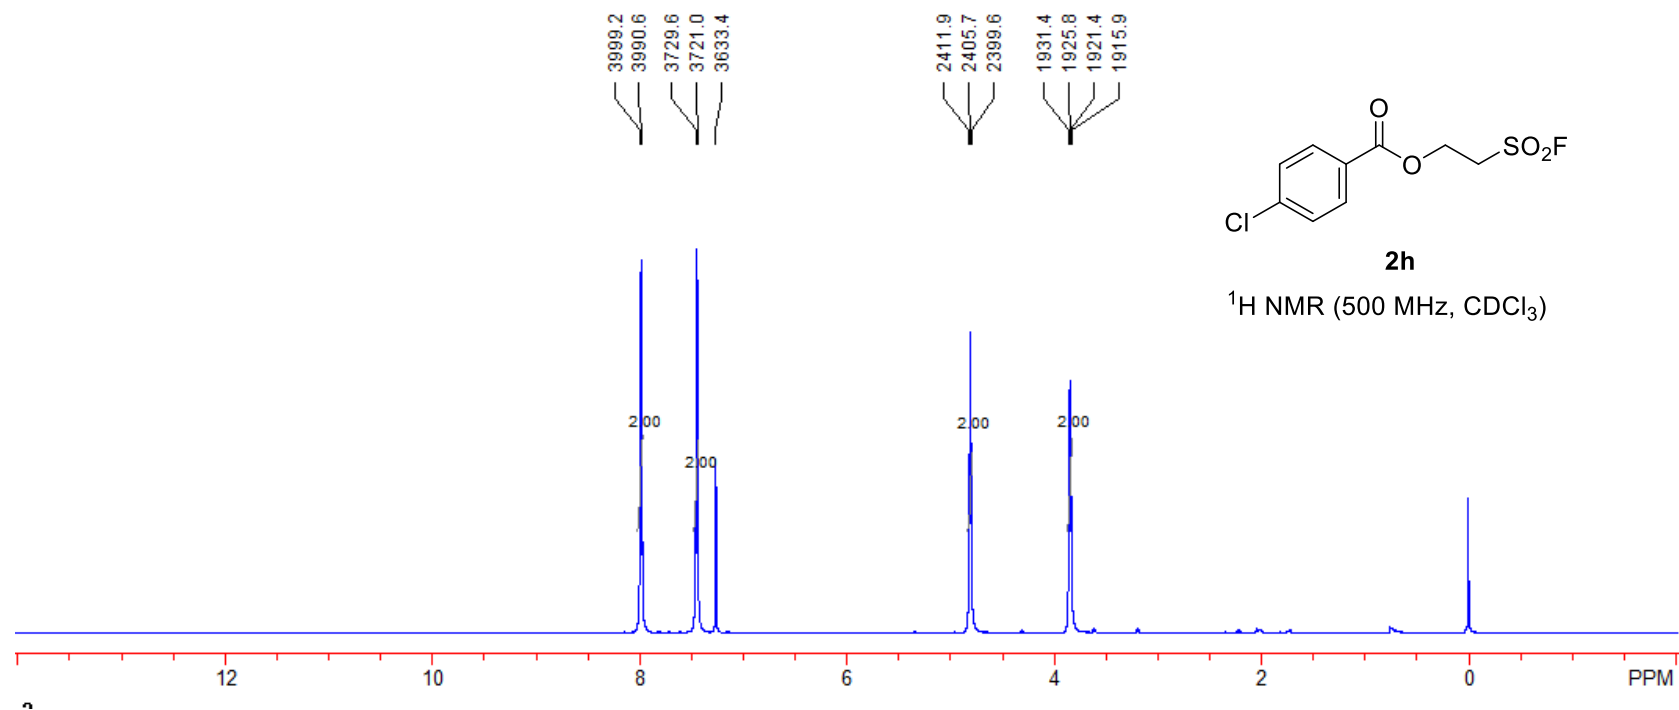

**Figure S22.** The  $^1\text{H}$  NMR spectrum of **2h**



**2h**,  $^{13}\text{C}$  NMR, 126 MHz,  $\text{CDCl}_3$

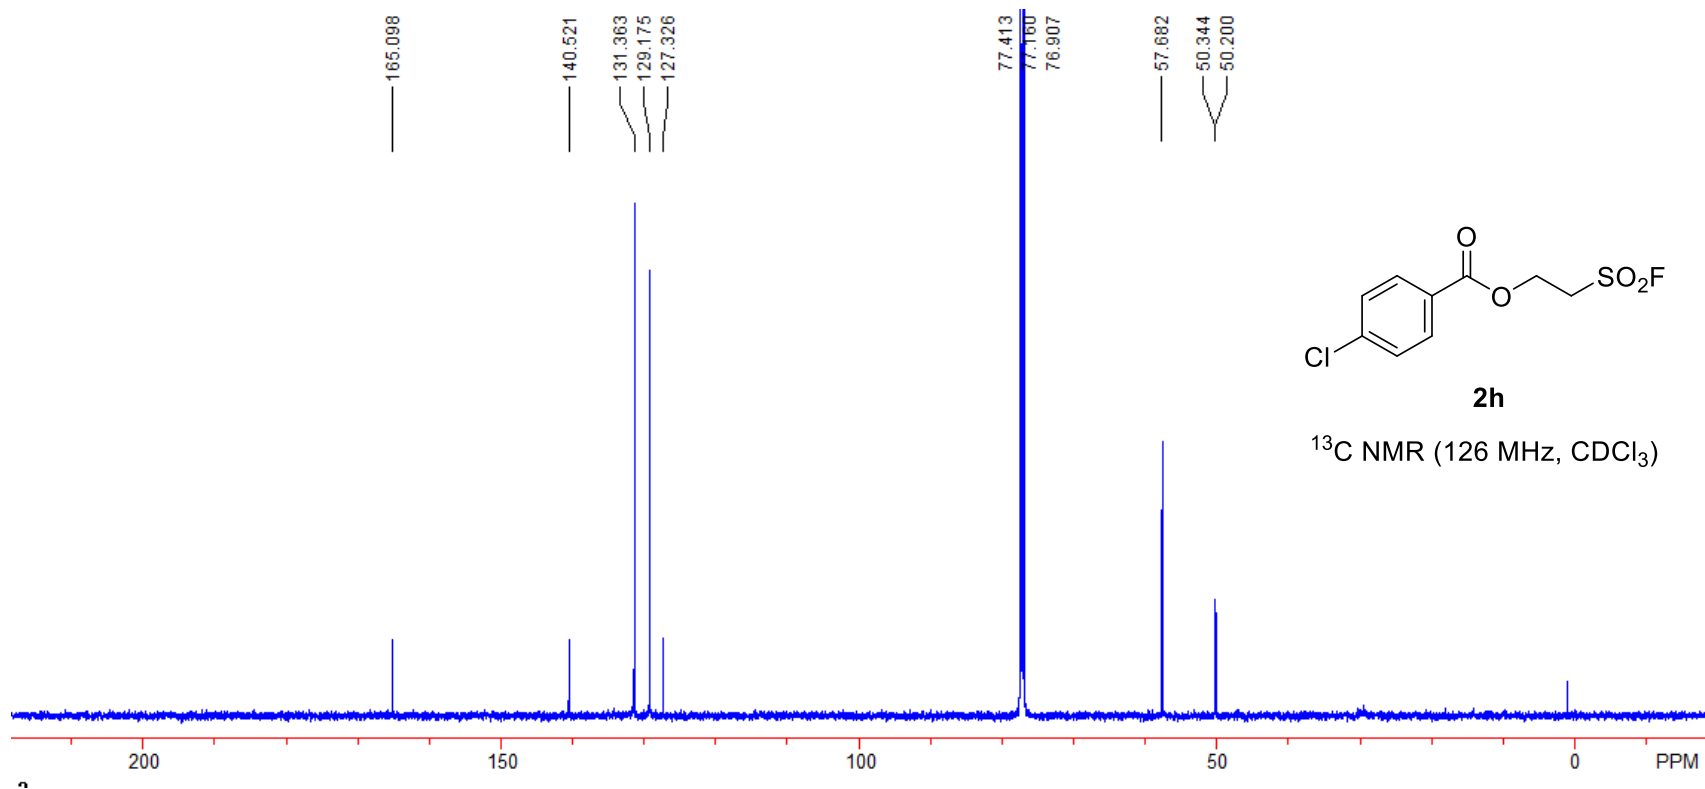

**Figure S23.** The  $^{13}\text{C}$  NMR spectrum of **2h**

**2h**,  $^{19}\text{F}$  NMR, 471 MHz,  $\text{CDCl}_3$

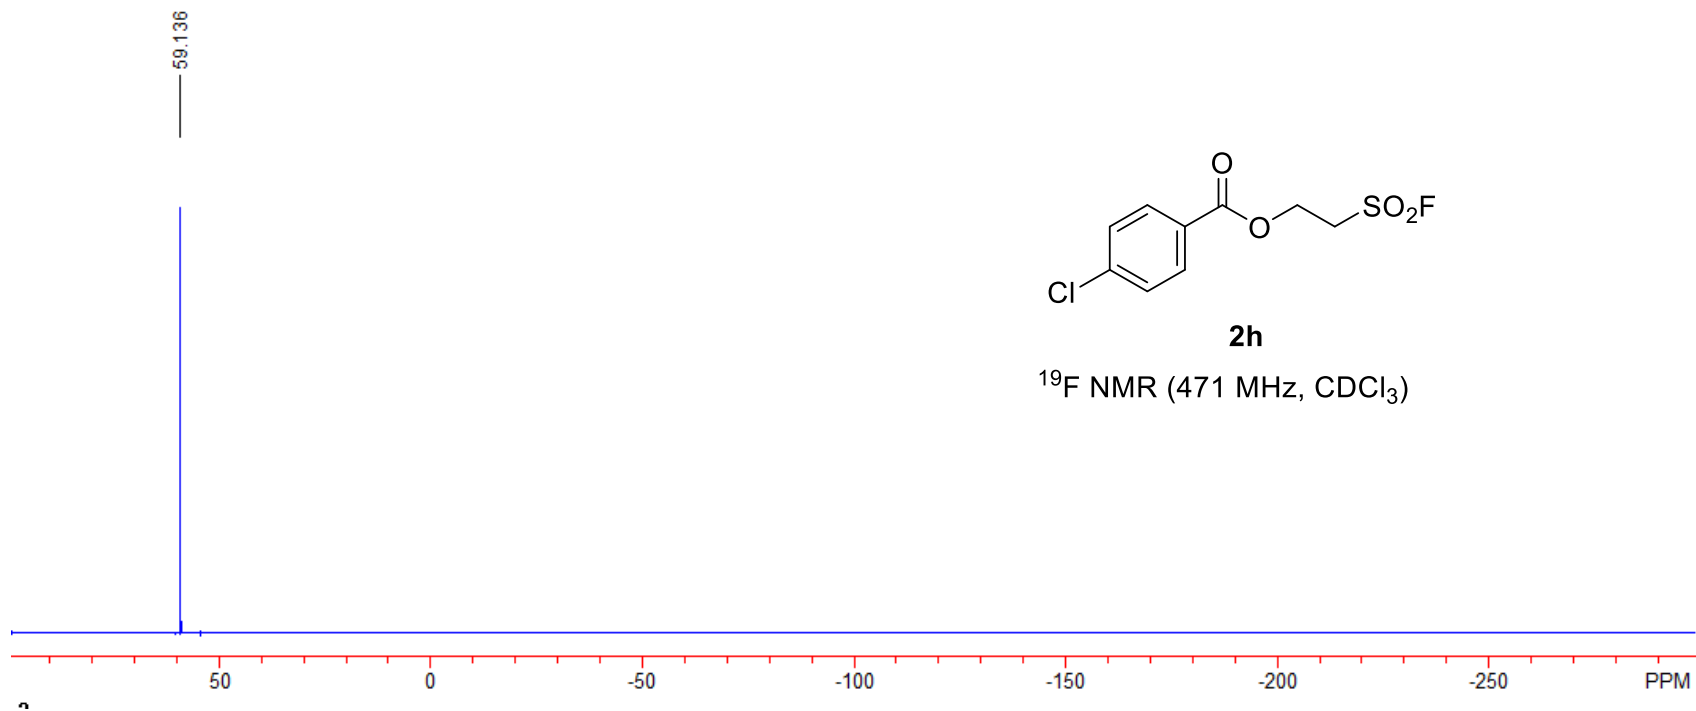

**Figure S24.** The  $^{19}\text{F}$  NMR spectrum of **2h**

**2i**,  $^1\text{H}$  NMR, 500 MHz,  $\text{CDCl}_3$

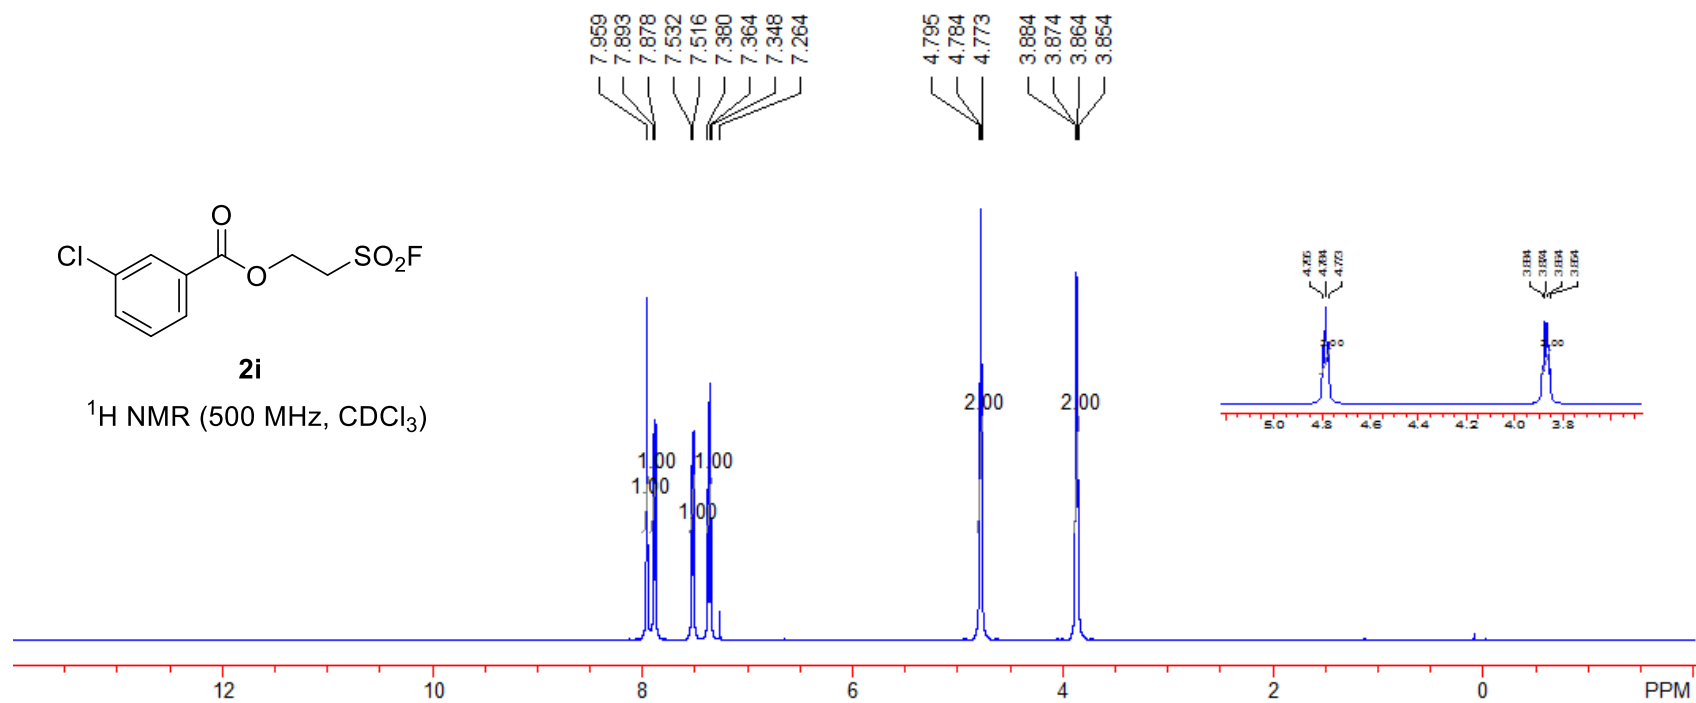

**Figure S25.** The  $^1\text{H}$  NMR spectrum of **2i**

**2i**,  $^{13}\text{C}$  NMR, 126 MHz,  $\text{CDCl}_3$

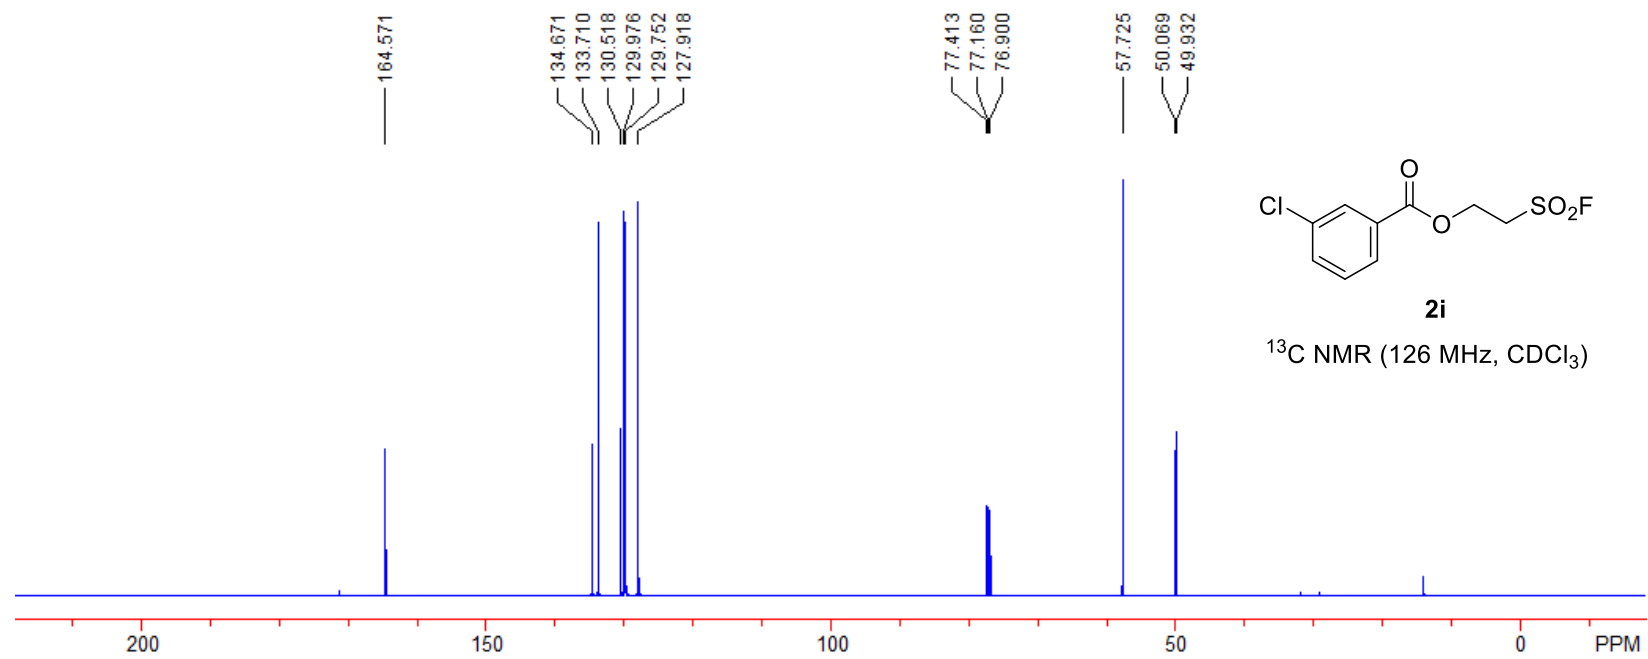

**Figure S26.** The  $^{13}\text{C}$  NMR spectrum of **2i**

**2i**,  $^{19}\text{F}$  NMR, 471 MHz,  $\text{CDCl}_3$

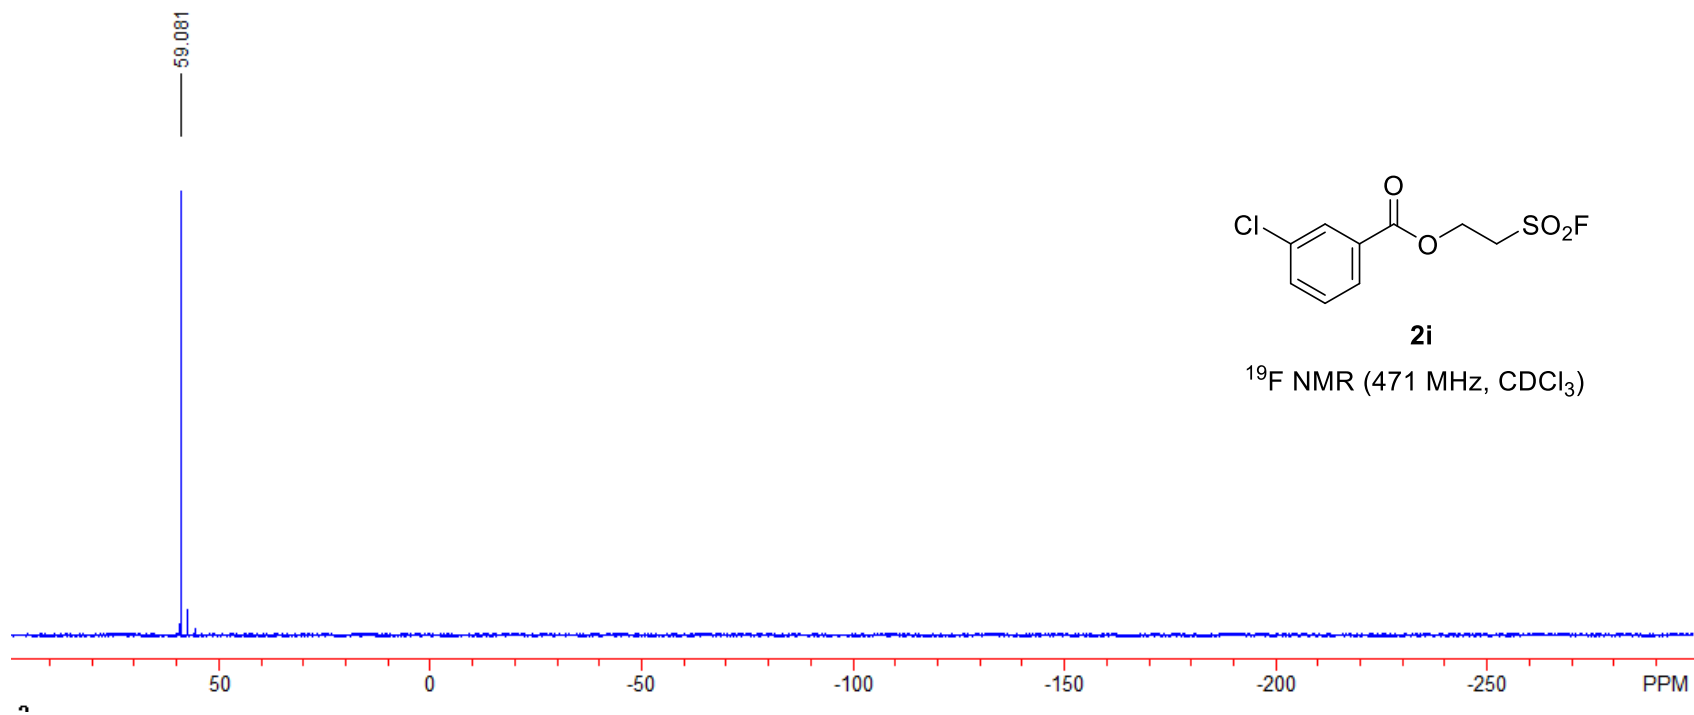

**Figure S27.** The  $^{19}\text{F}$  NMR spectrum of **2i**

**2j**,  $^1\text{H}$  NMR, 500 MHz,  $\text{CDCl}_3$

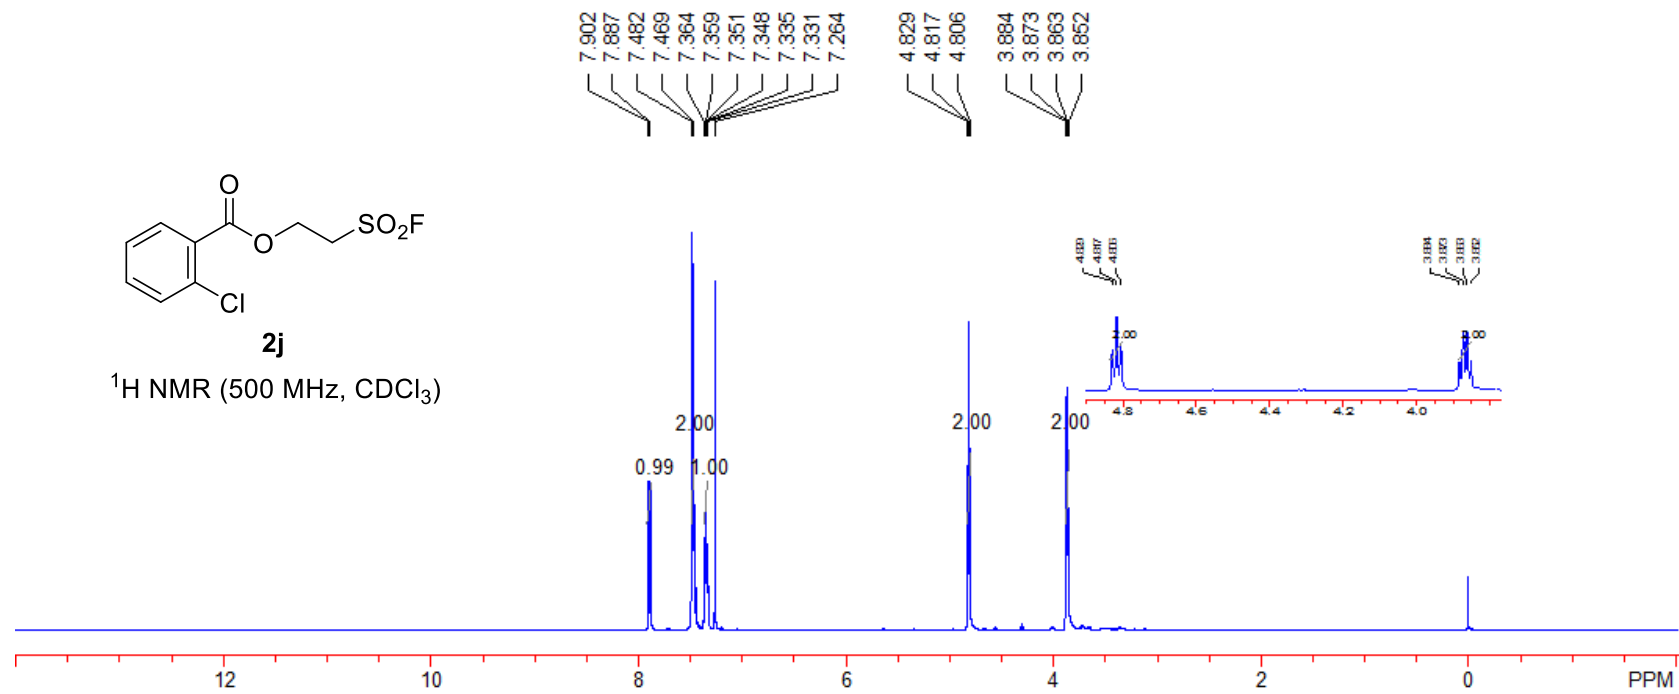

**Figure S28.** The  $^1\text{H}$  NMR spectrum of **2j**

**2j**,  $^{13}\text{C}$  NMR, 126 MHz,  $\text{CDCl}_3$

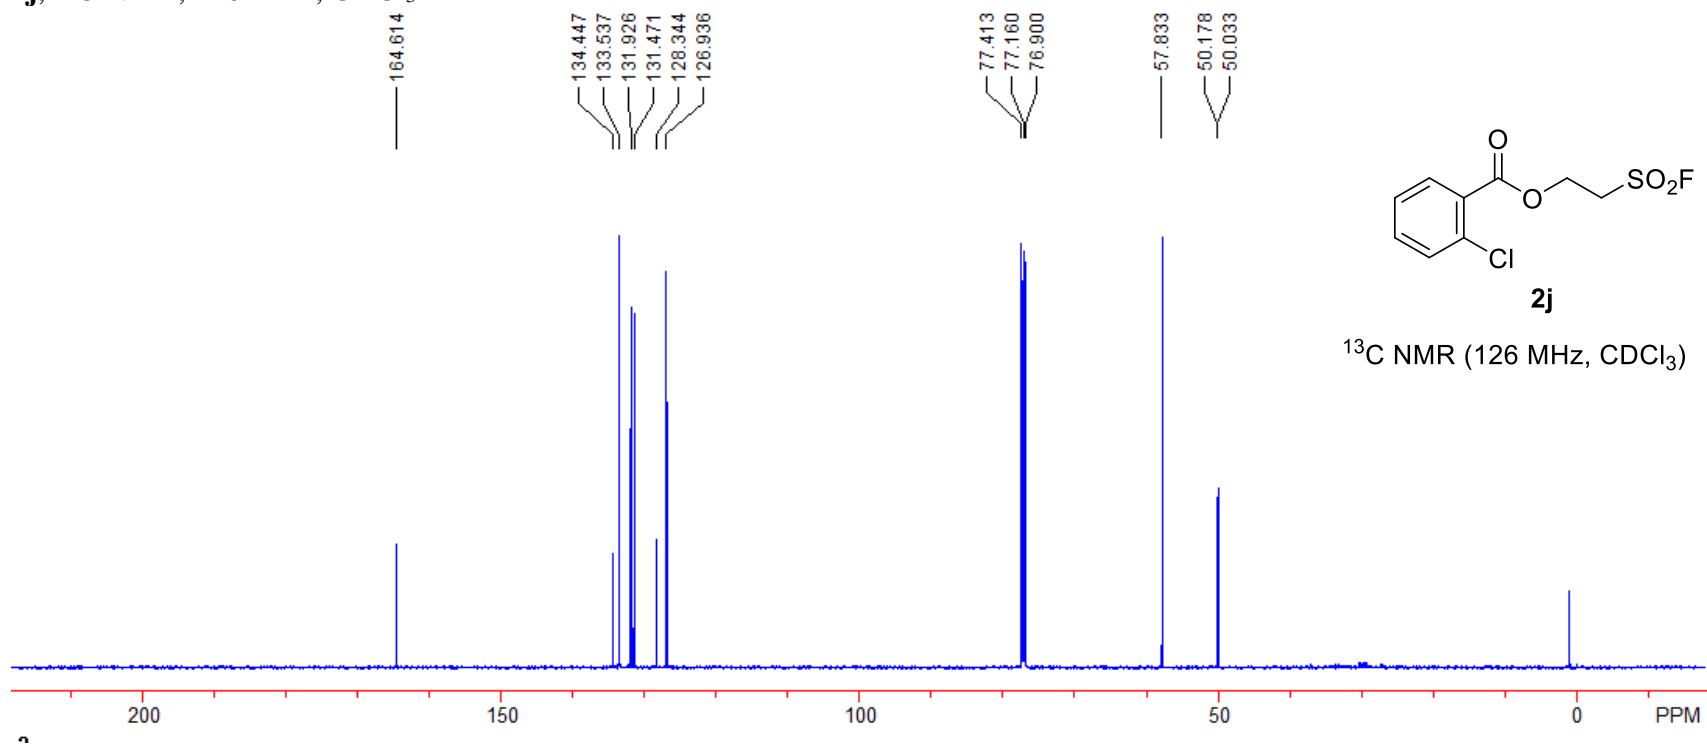

**Figure S29.** The  $^{13}\text{C}$  NMR spectrum of **2j**

**2j**,  $^{19}\text{F}$  NMR, 471 MHz,  $\text{CDCl}_3$

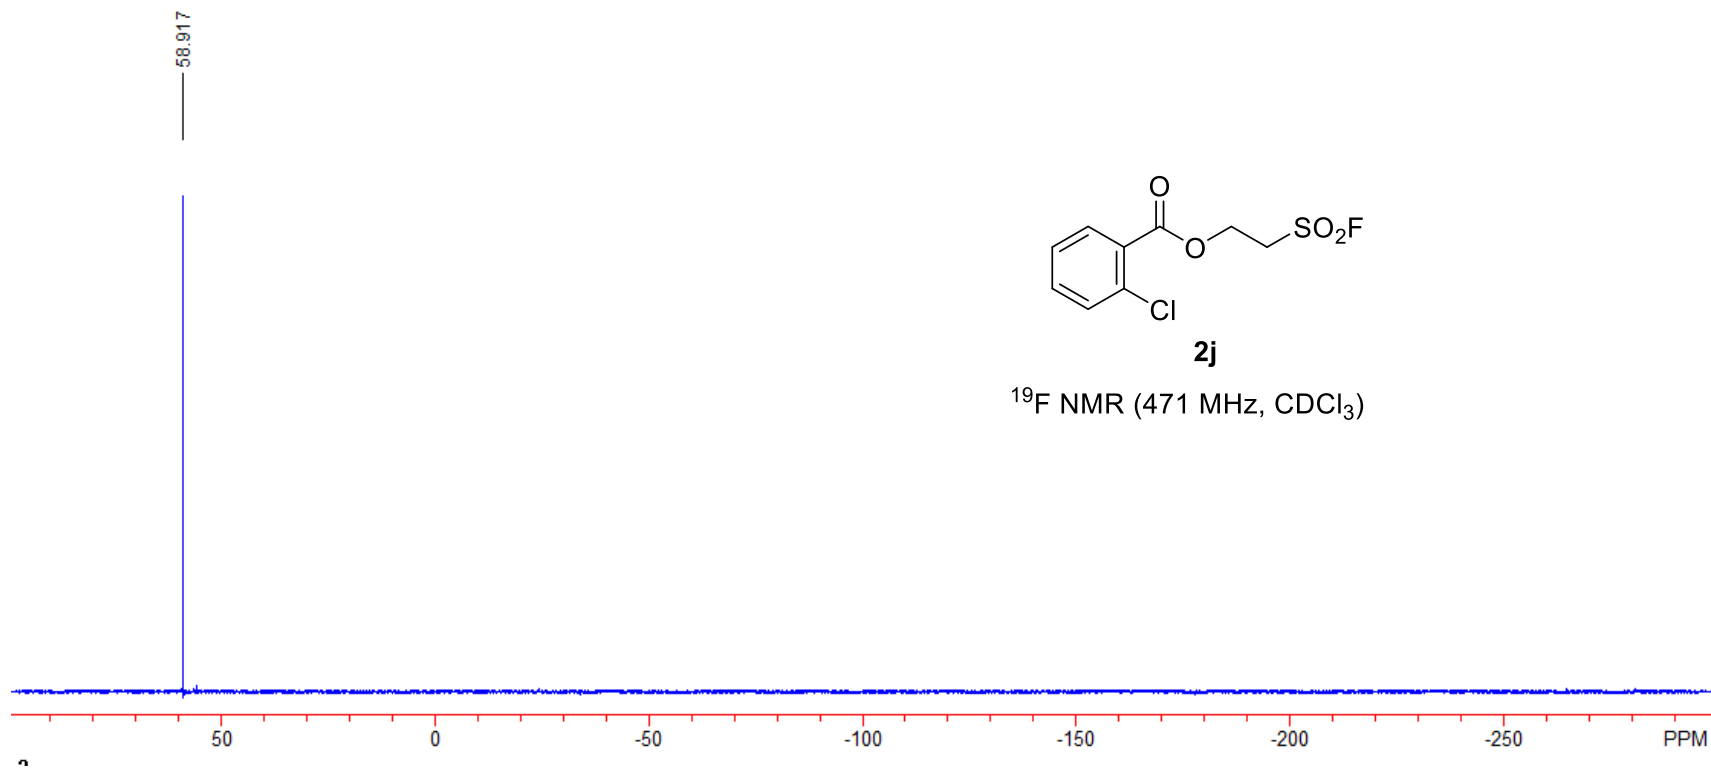

**Figure S30.** The  $^{19}\text{F}$  NMR spectrum of **2j**





**2k**,  $^{13}\text{C}$  NMR, 126 MHz,  $\text{CDCl}_3$

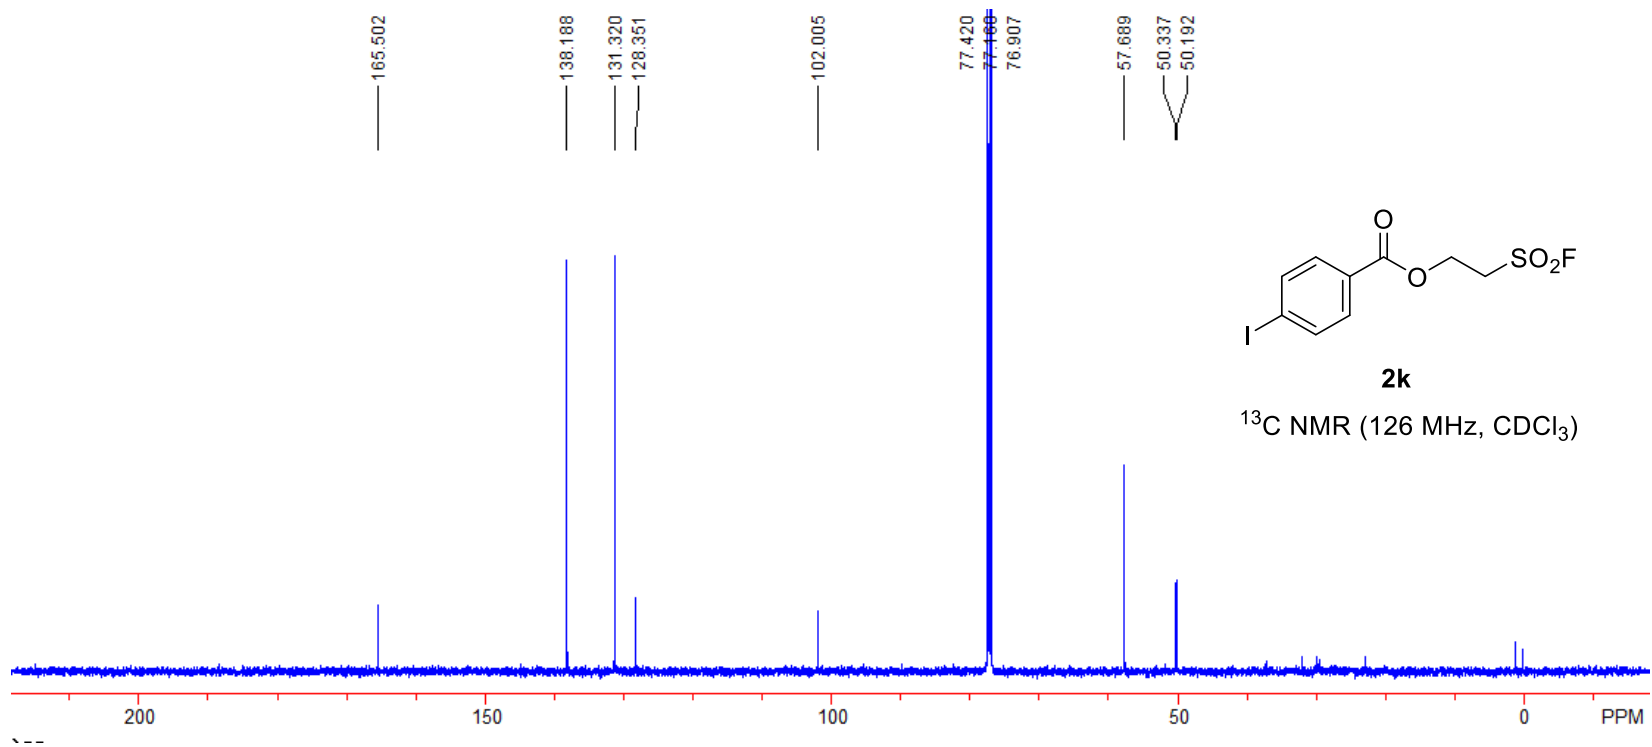

**Figure S32.** The  $^{13}\text{C}$  NMR spectrum of **2k**

**2k**,  $^{19}\text{F}$  NMR, 471 MHz,  $\text{CDCl}_3$

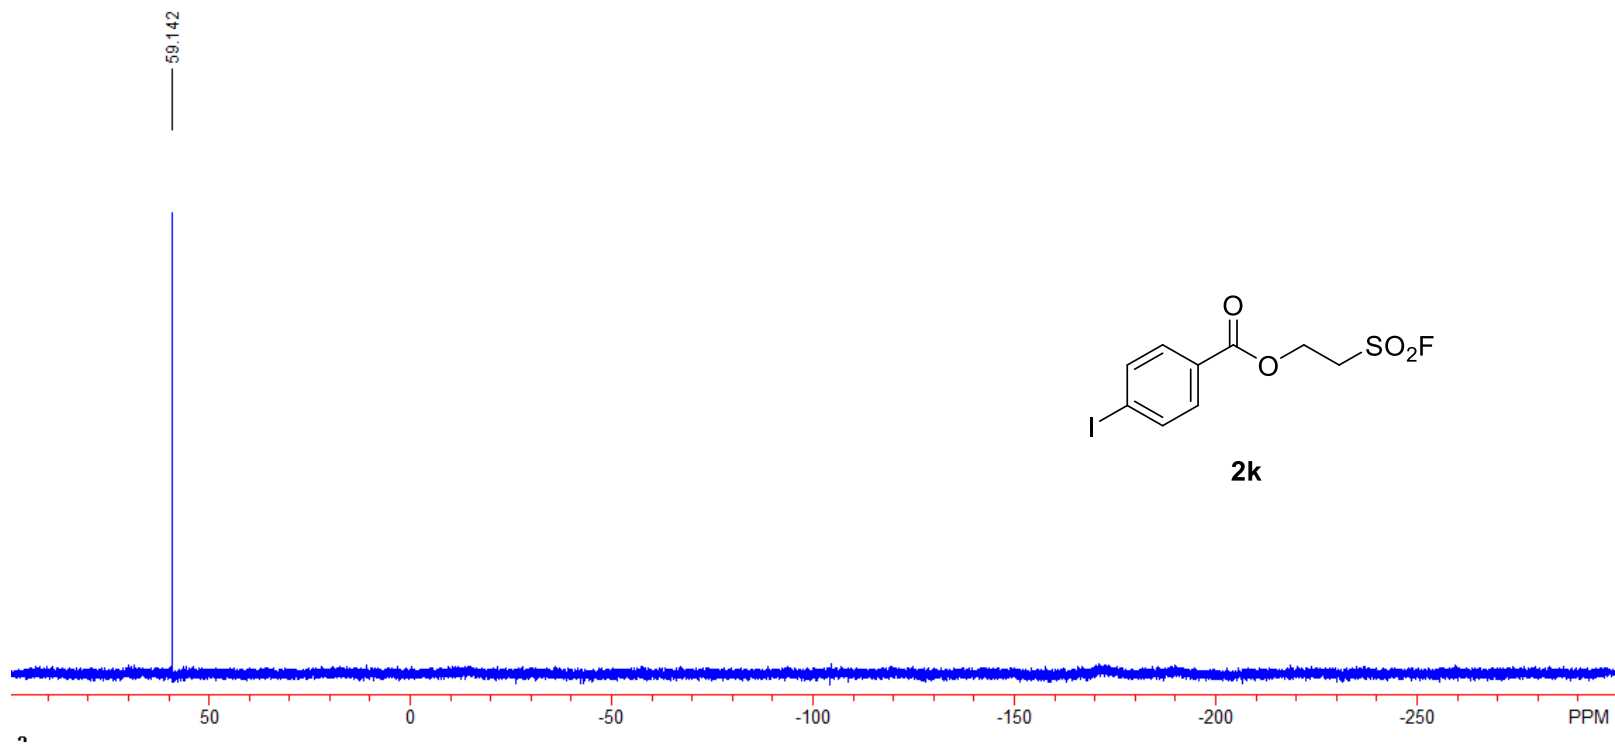

**Figure S33.** The  $^{19}\text{F}$  NMR spectrum of **2k**

**21**,  $^1\text{H}$  NMR, 500 MHz,  $\text{CDCl}_3$

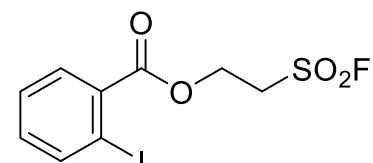

**21**

$^1\text{H}$  NMR (500 MHz,  $\text{CDCl}_3$ )

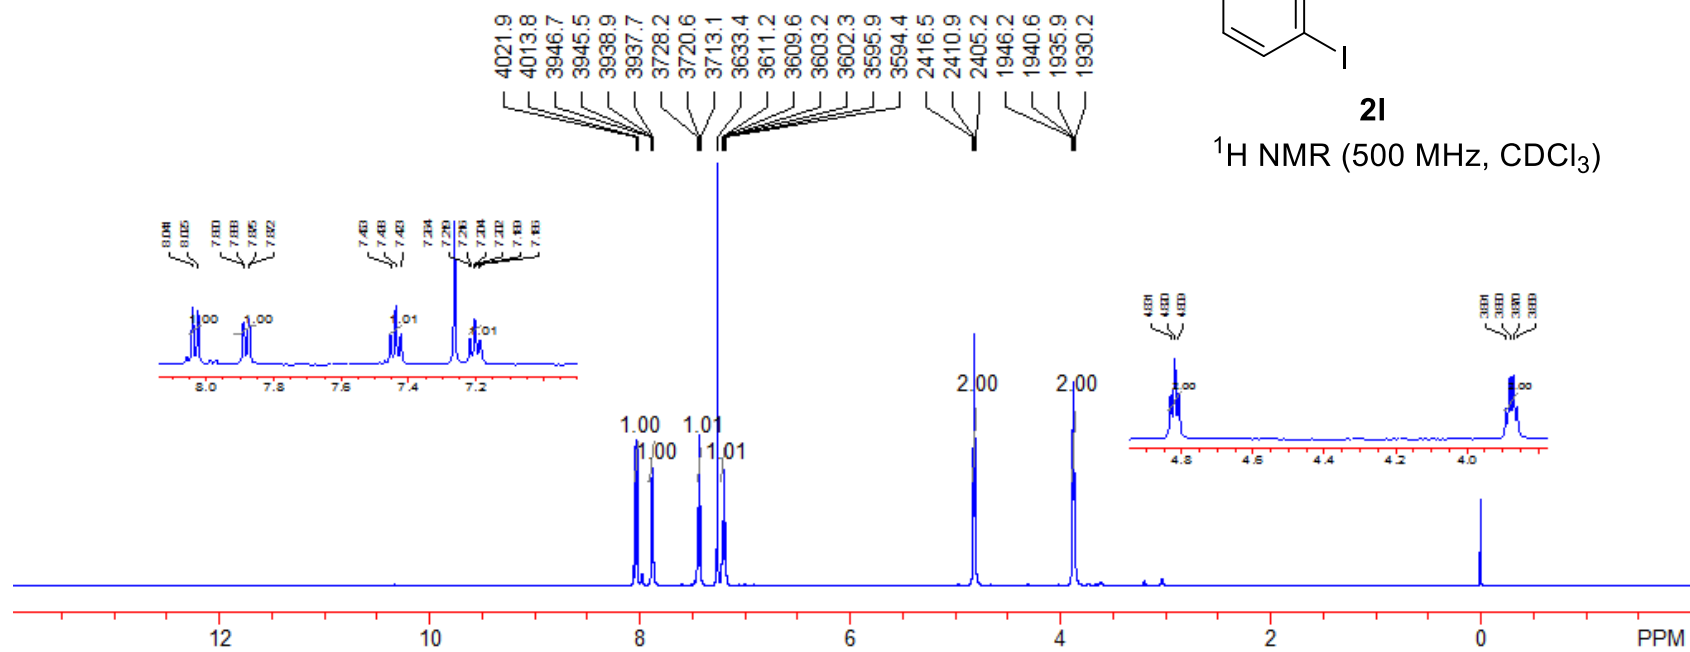

**Figure S34.** The  $^1\text{H}$  NMR spectrum of **21**

**2l**,  $^{13}\text{C}$  NMR, 126 MHz,  $\text{CDCl}_3$

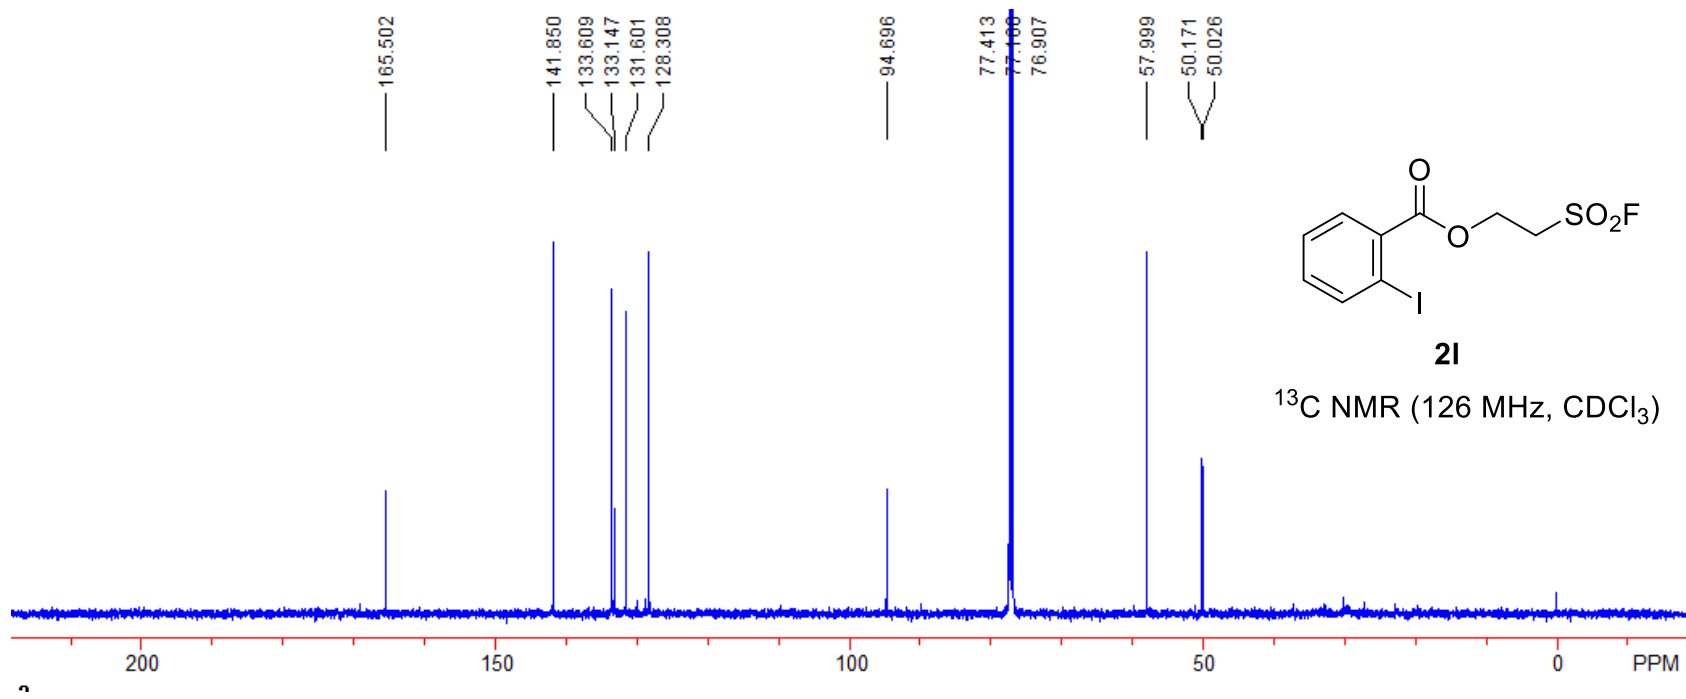

**Figure S35.** The  $^{13}\text{C}$  NMR spectrum of **2l**

**21**,  $^{19}\text{F}$  NMR, 471 MHz,  $\text{CDCl}_3$

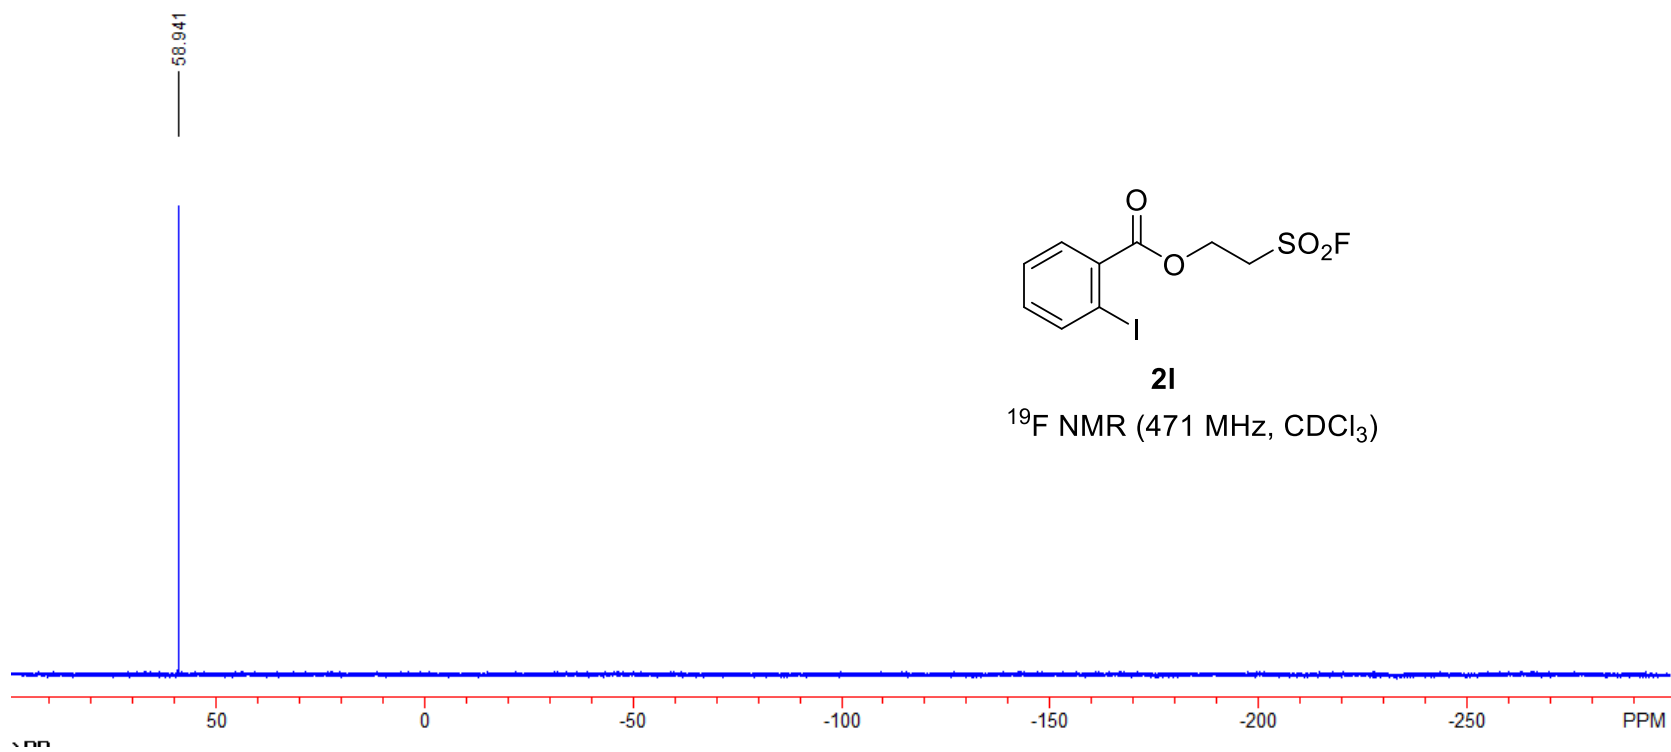

**Figure S36.** The  $^{19}\text{F}$  NMR spectrum of **21**

**2m**,  $^1\text{H}$  NMR, 500 MHz,  $\text{CDCl}_3$

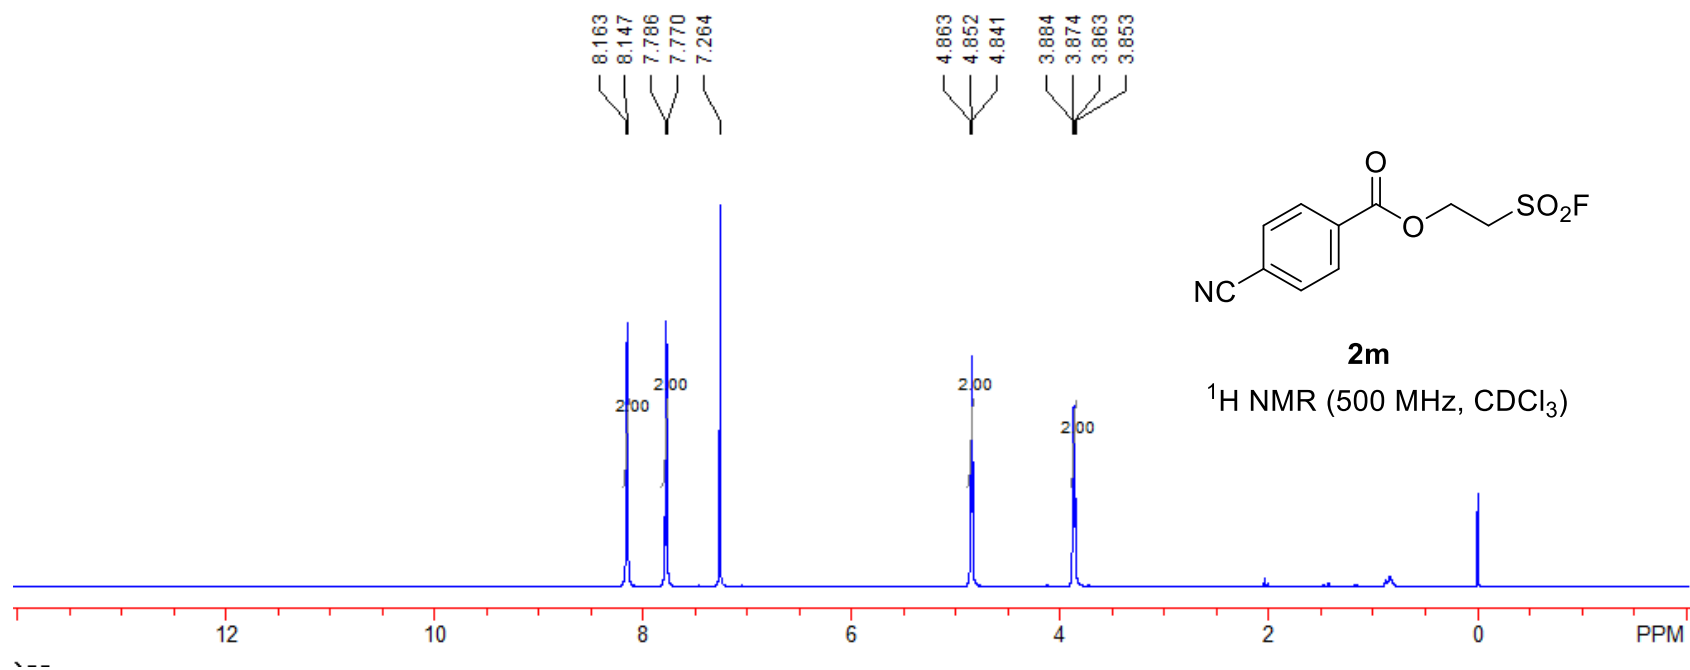

**Figure S37.** The  $^1\text{H}$  NMR spectrum of **2m**

**2m**,  $^{13}\text{C}$  NMR, 126 MHz,  $\text{CDCl}_3$

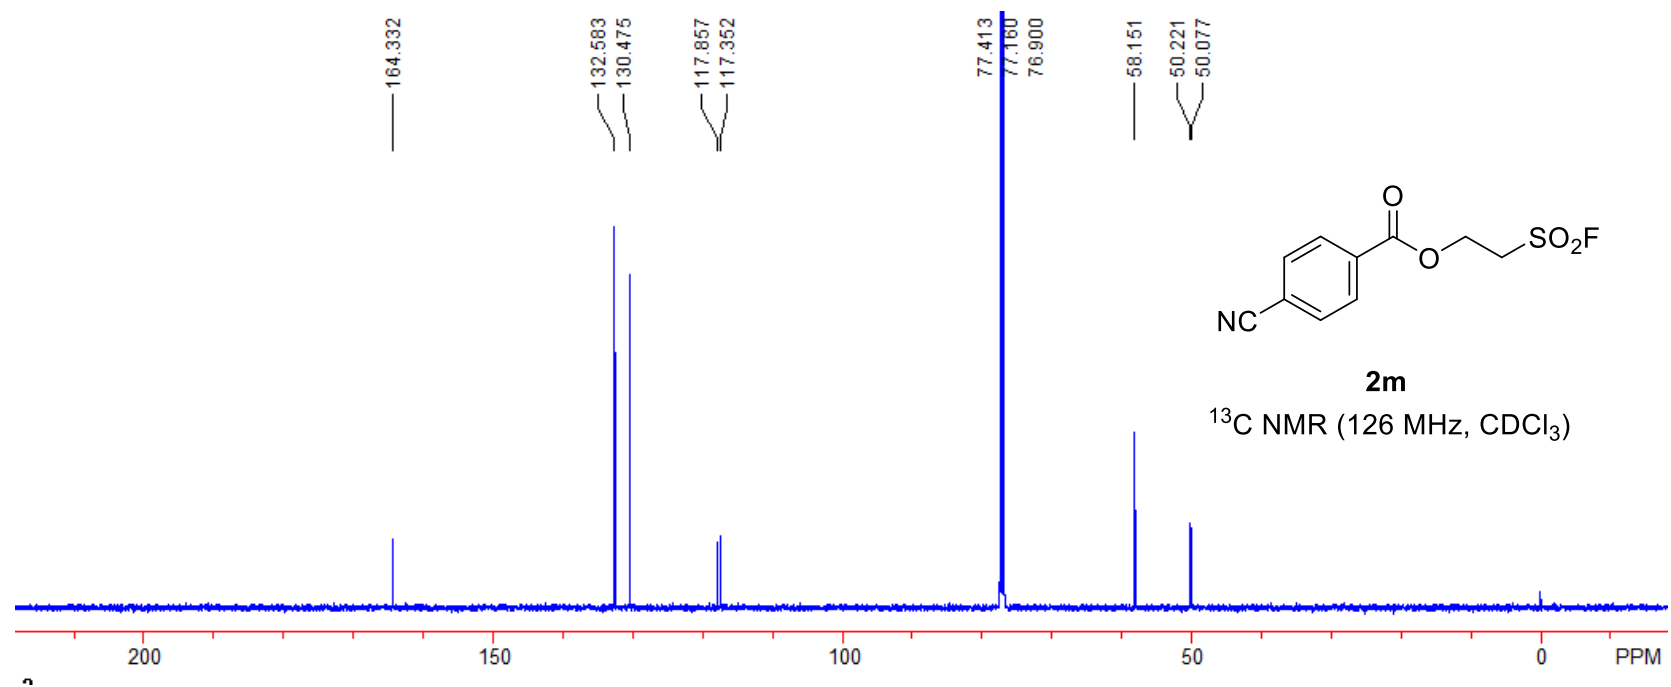

**Figure S38.** The  $^{13}\text{C}$  NMR spectrum of **2m**



**2m**,  $^{19}\text{F}$  NMR, 471 MHz,  $\text{CDCl}_3$

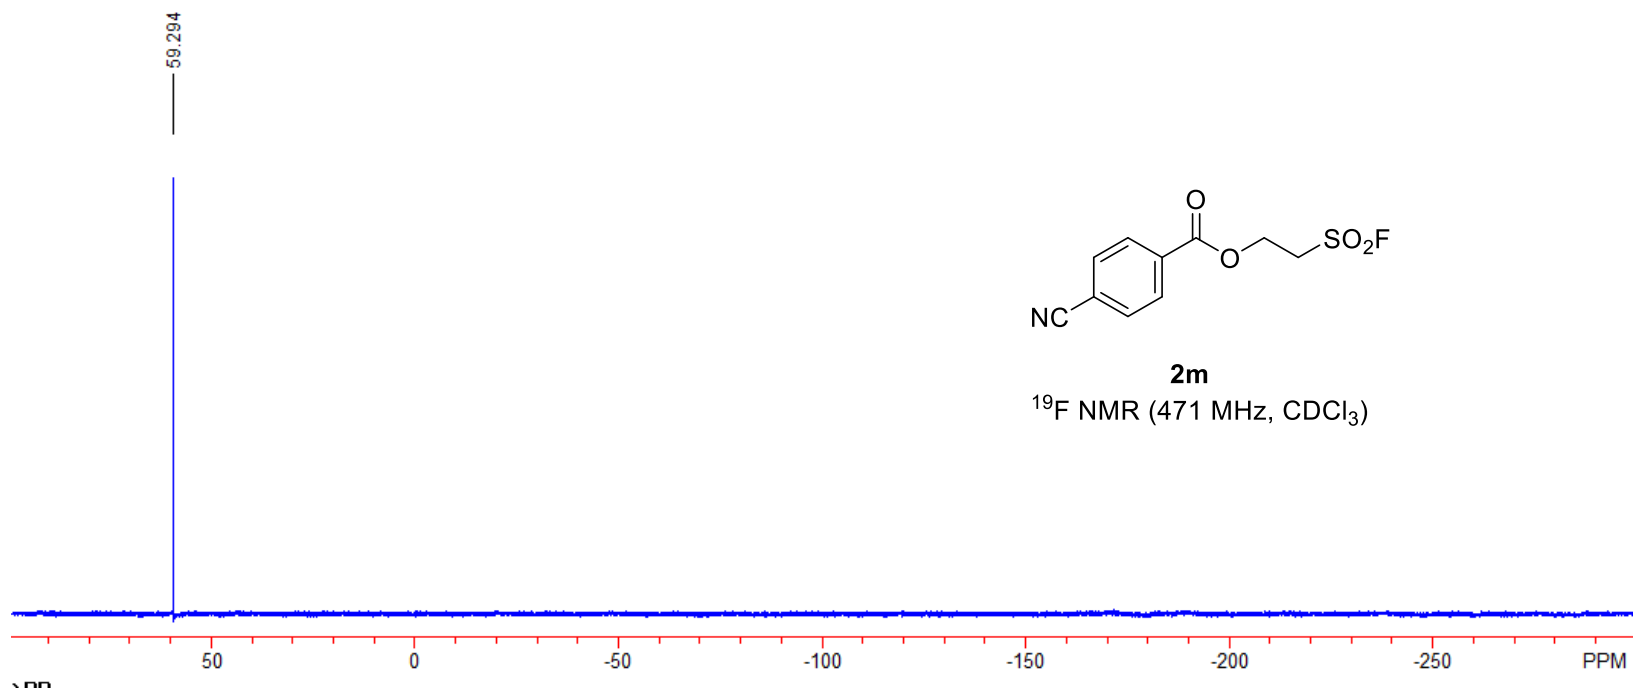

**Figure S39.** The  $^{19}\text{F}$  NMR spectrum of **2m**



**2n**,  $^{13}\text{C}$  NMR, 126 MHz,  $\text{CDCl}_3$

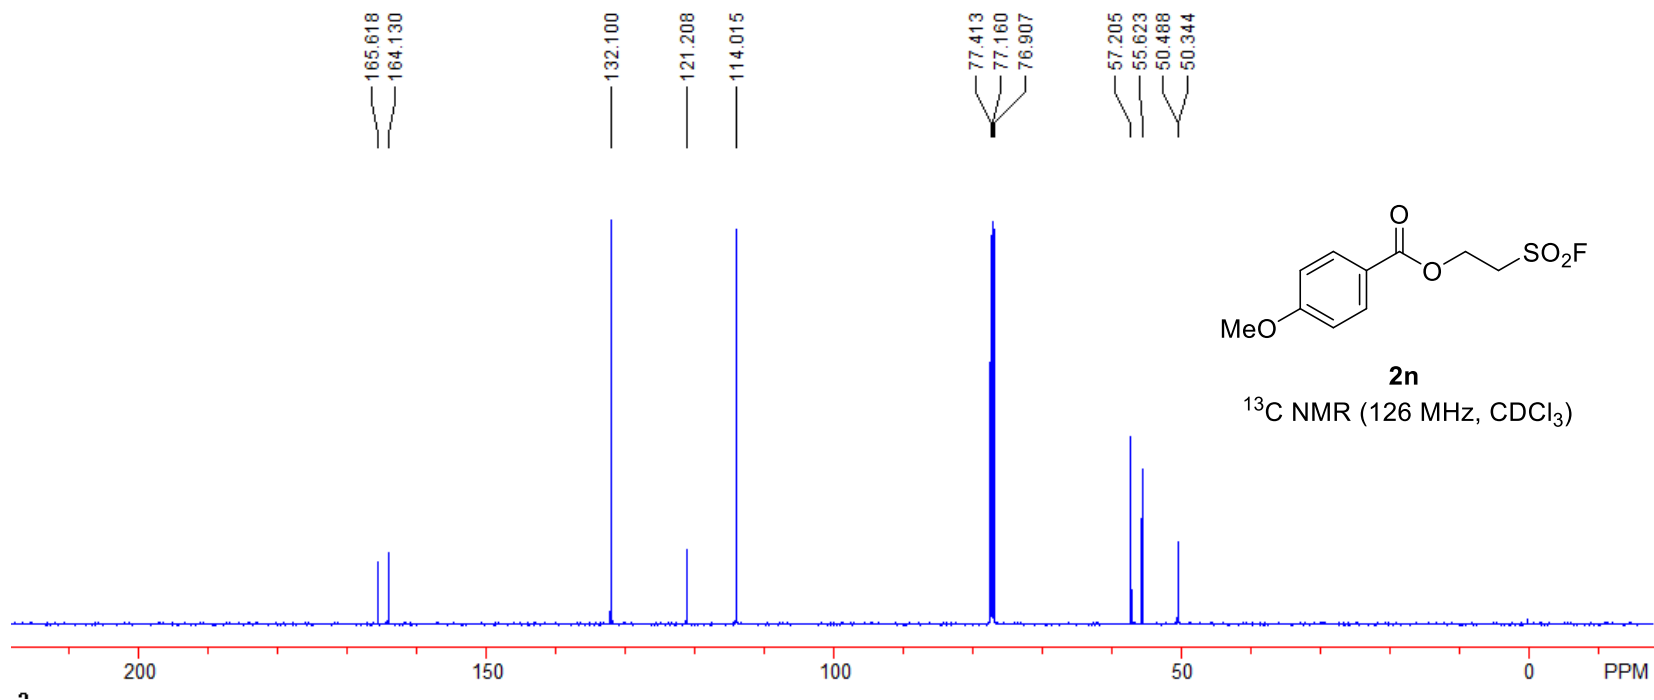

**Figure S41.** The  $^{13}\text{C}$  NMR spectrum of **2n**

**2n**,  $^{19}\text{F}$  NMR, 471 MHz,  $\text{CDCl}_3$

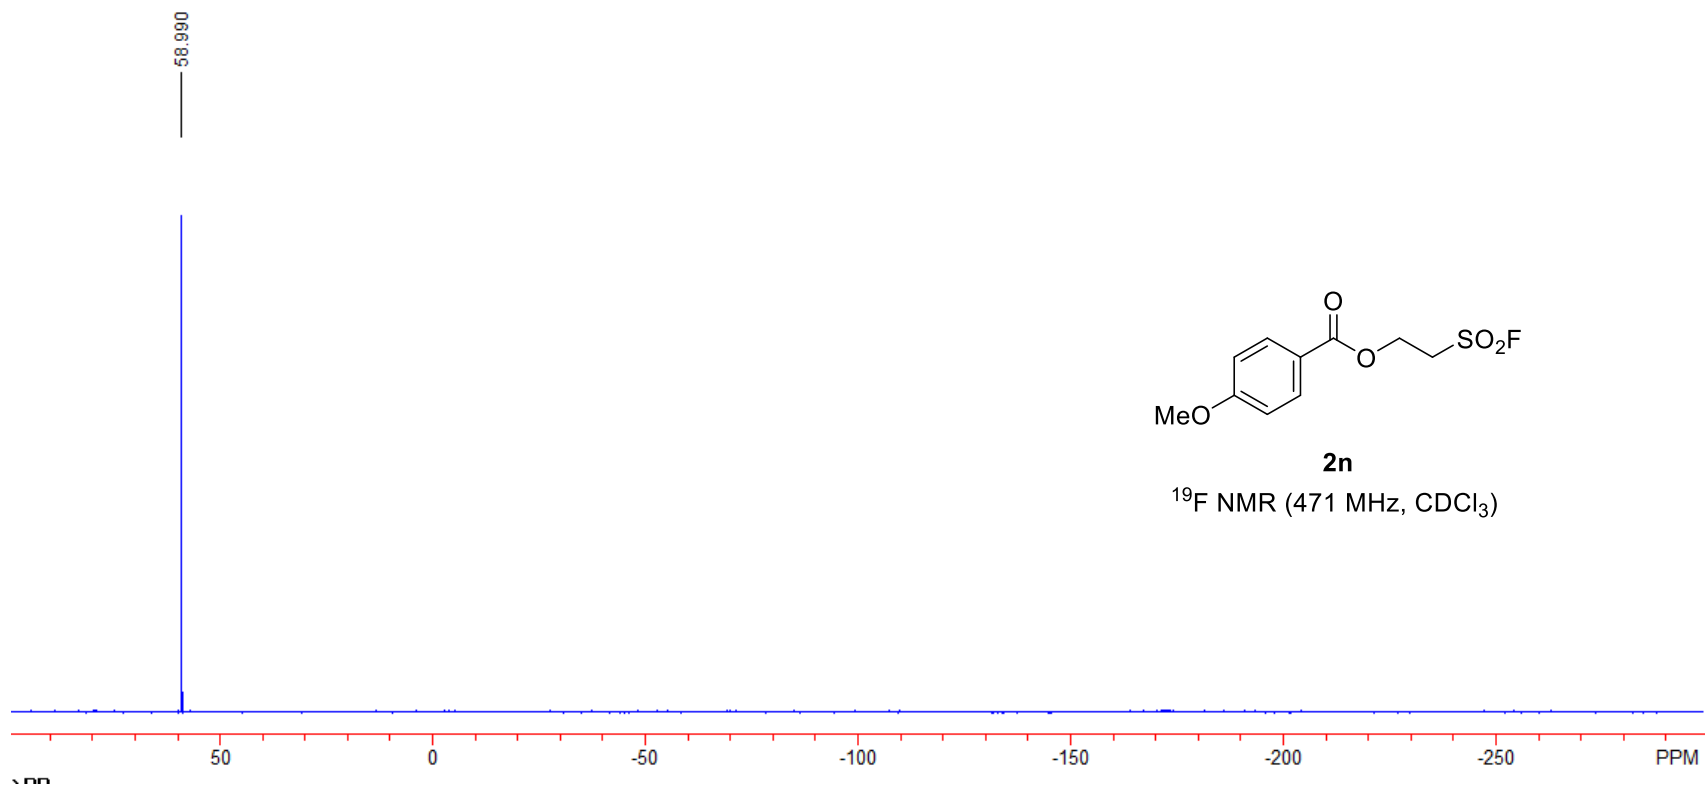

**Figure S42.** The  $^{19}\text{F}$  NMR spectrum of **2n**

**2o**,  $^1\text{H}$  NMR, 500 MHz,  $\text{CDCl}_3$

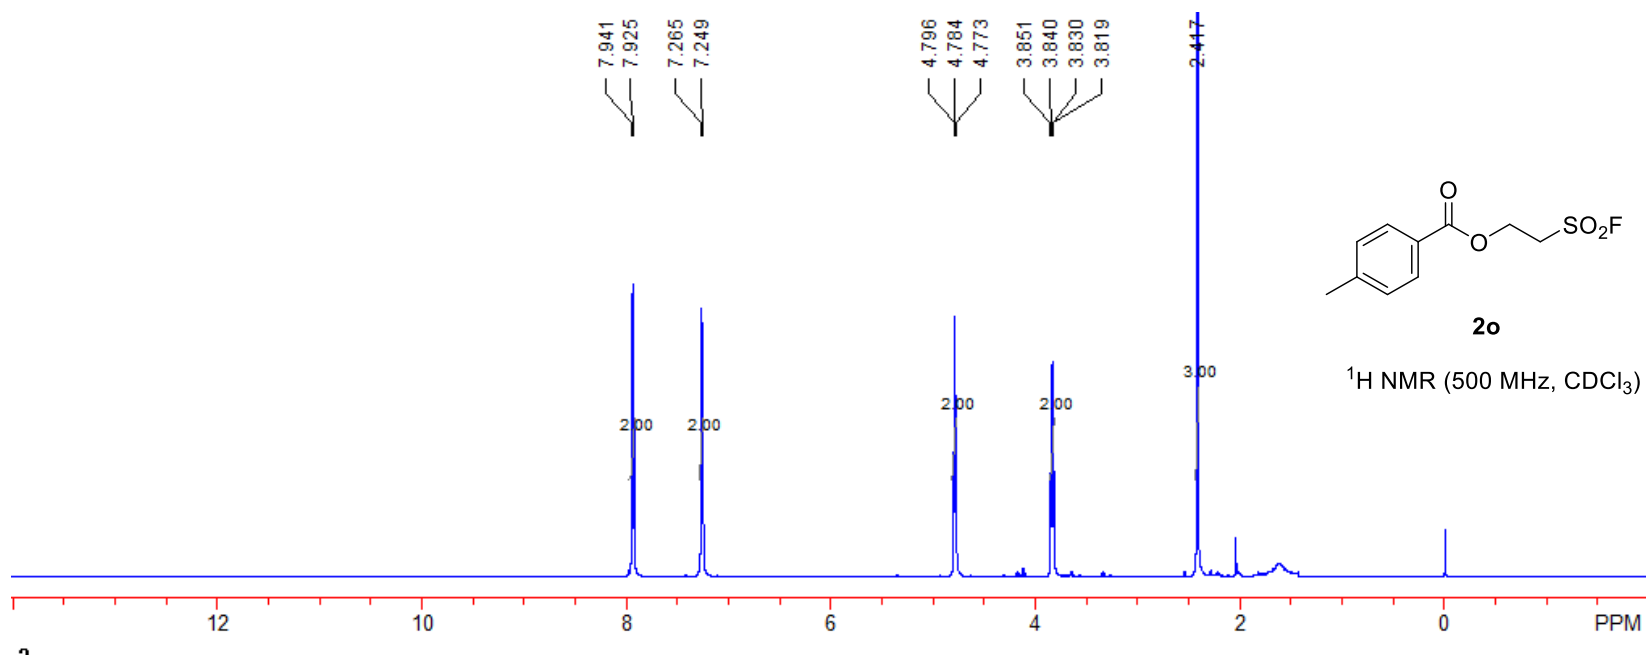

**Figure S43.** The  $^1\text{H}$  NMR spectrum of **2o**

**2o**,  $^{13}\text{C}$  NMR, 126 MHz,  $\text{CDCl}_3$

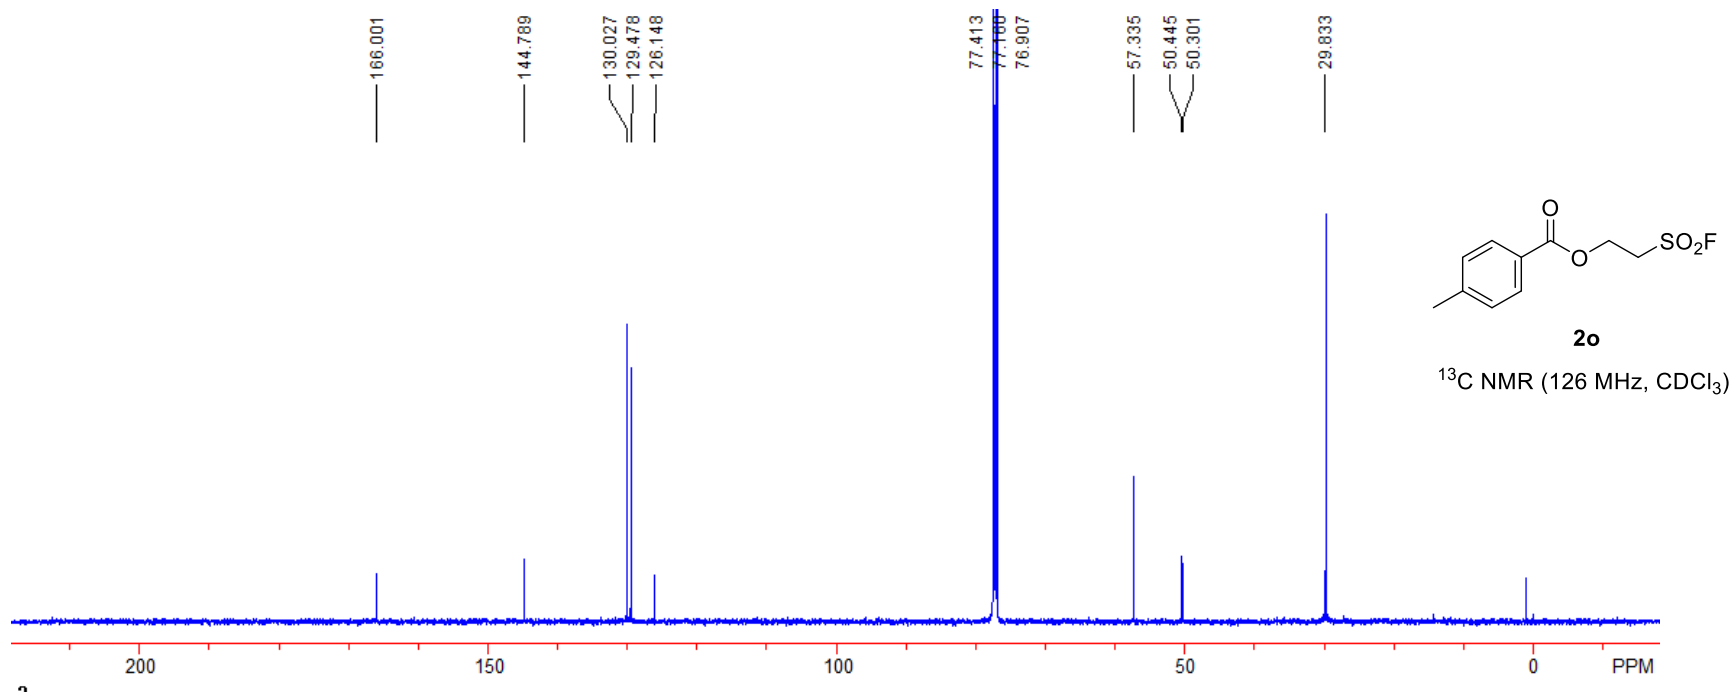

**Figure S44.** The  $^{13}\text{C}$  NMR spectrum of **2o**

**2o**,  $^{19}\text{F}$  NMR, 471 MHz,  $\text{CDCl}_3$

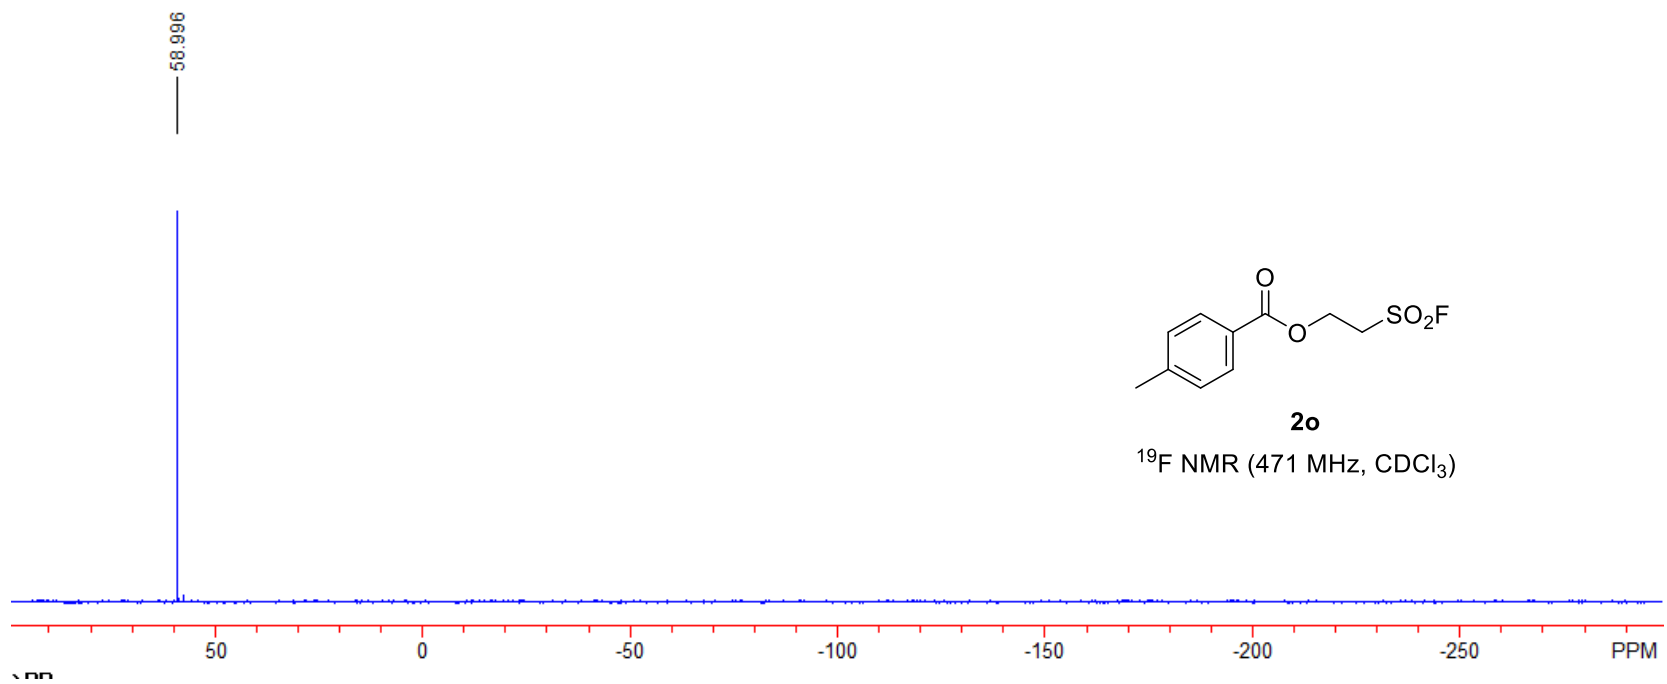

**Figure S45.** The  $^{19}\text{F}$  NMR spectrum of **2o**

**2p**,  $^1\text{H}$  NMR, 500 MHz,  $\text{CDCl}_3$

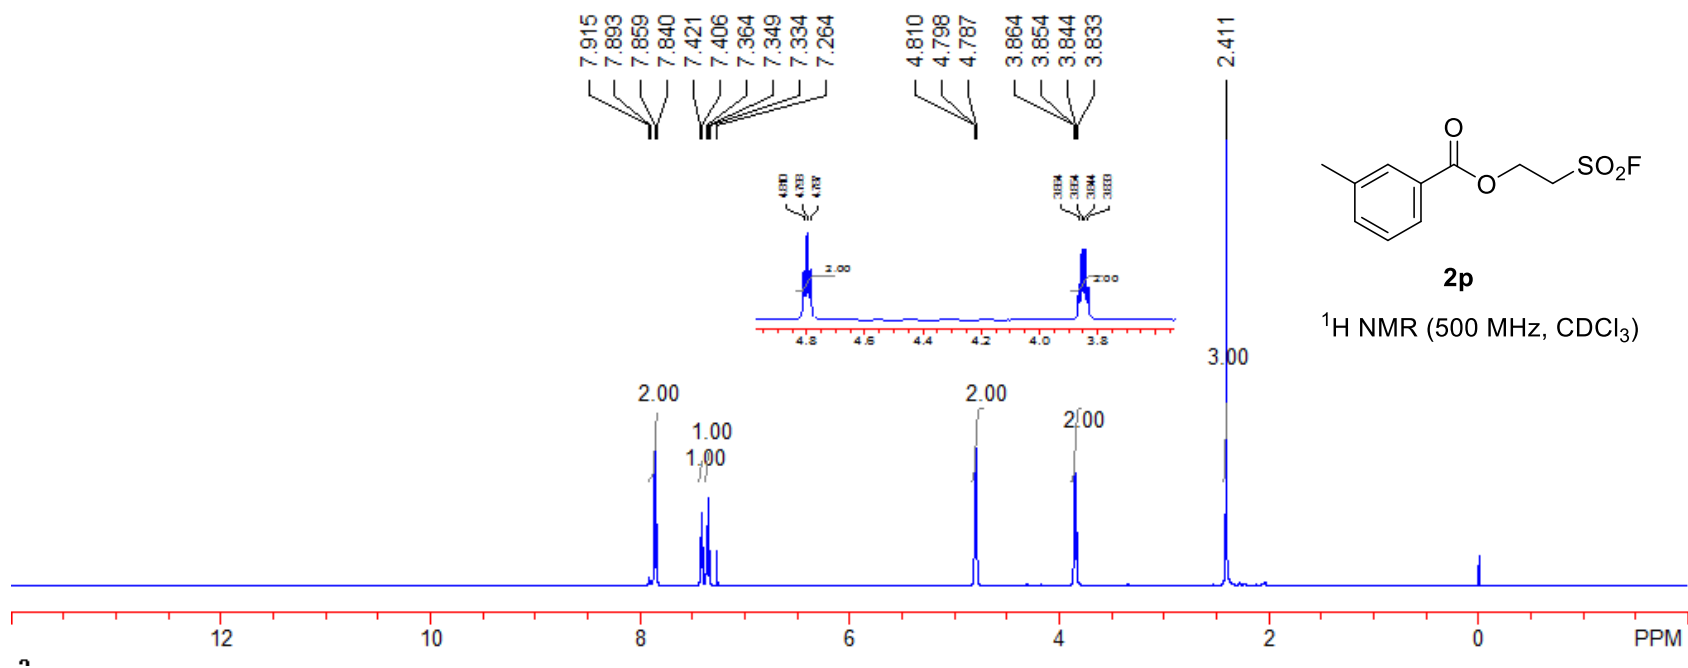

**Figure S46.** The  $^1\text{H}$  NMR spectrum of **2p**



**2p**,  $^{13}\text{C}$  NMR, 126 MHz,  $\text{CDCl}_3$

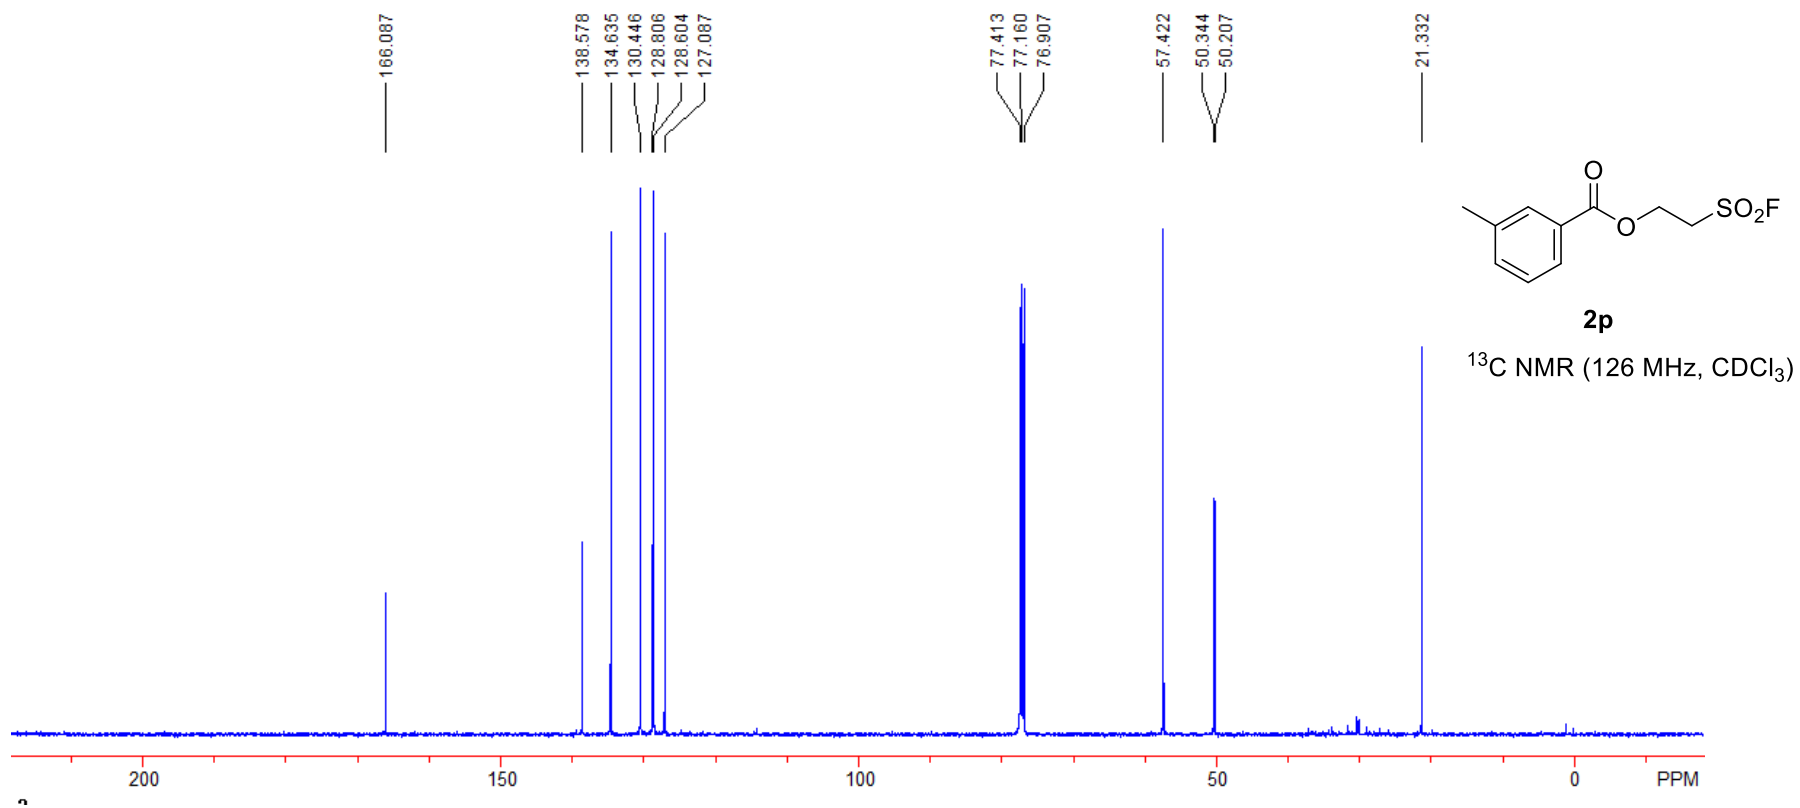

**Figure S47.** The  $^{13}\text{C}$  NMR spectrum of **2p**

**2p**,  $^{19}\text{F}$  NMR, 471 MHz,  $\text{CDCl}_3$

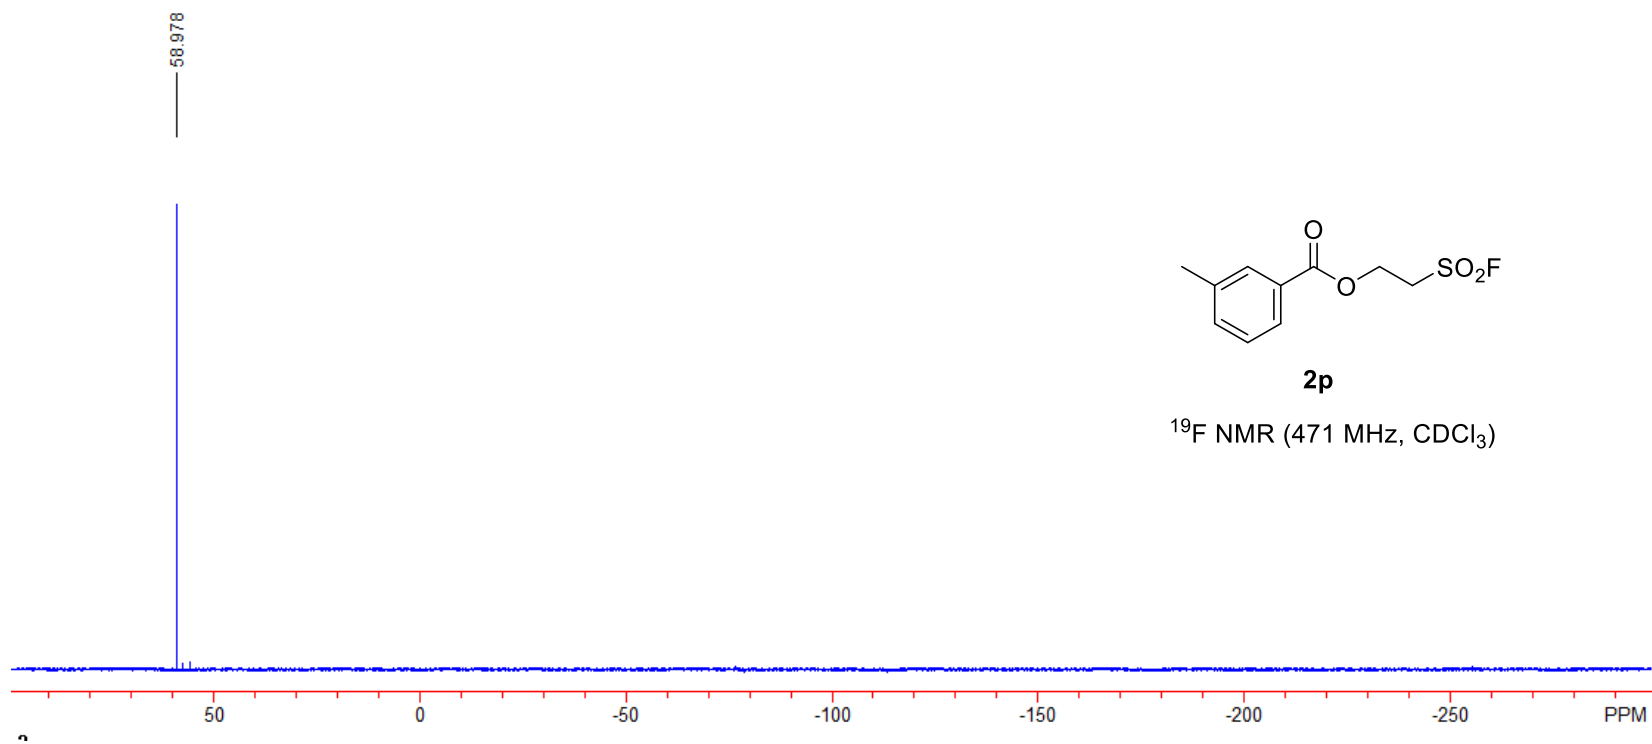

**Figure S48.** The  $^{19}\text{F}$  NMR spectrum of **2p**

**2q**,  $^1\text{H}$  NMR, 500 MHz,  $\text{CDCl}_3$

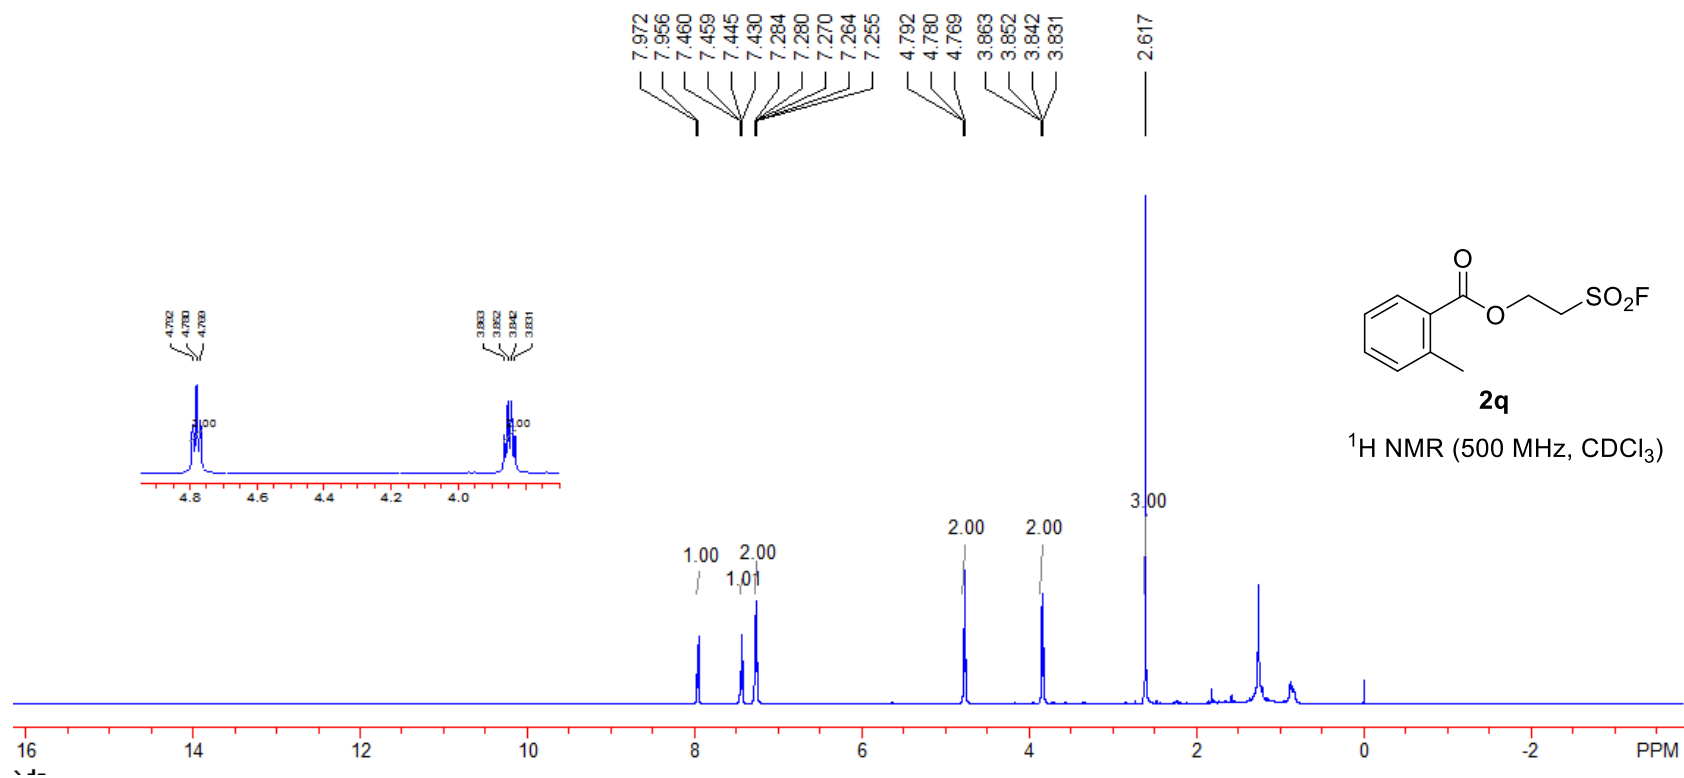

**Figure S49.** The  $^1\text{H}$  NMR spectrum of **2q**

**2q**,  $^{13}\text{C}$  NMR, 126 MHz,  $\text{CDCl}_3$

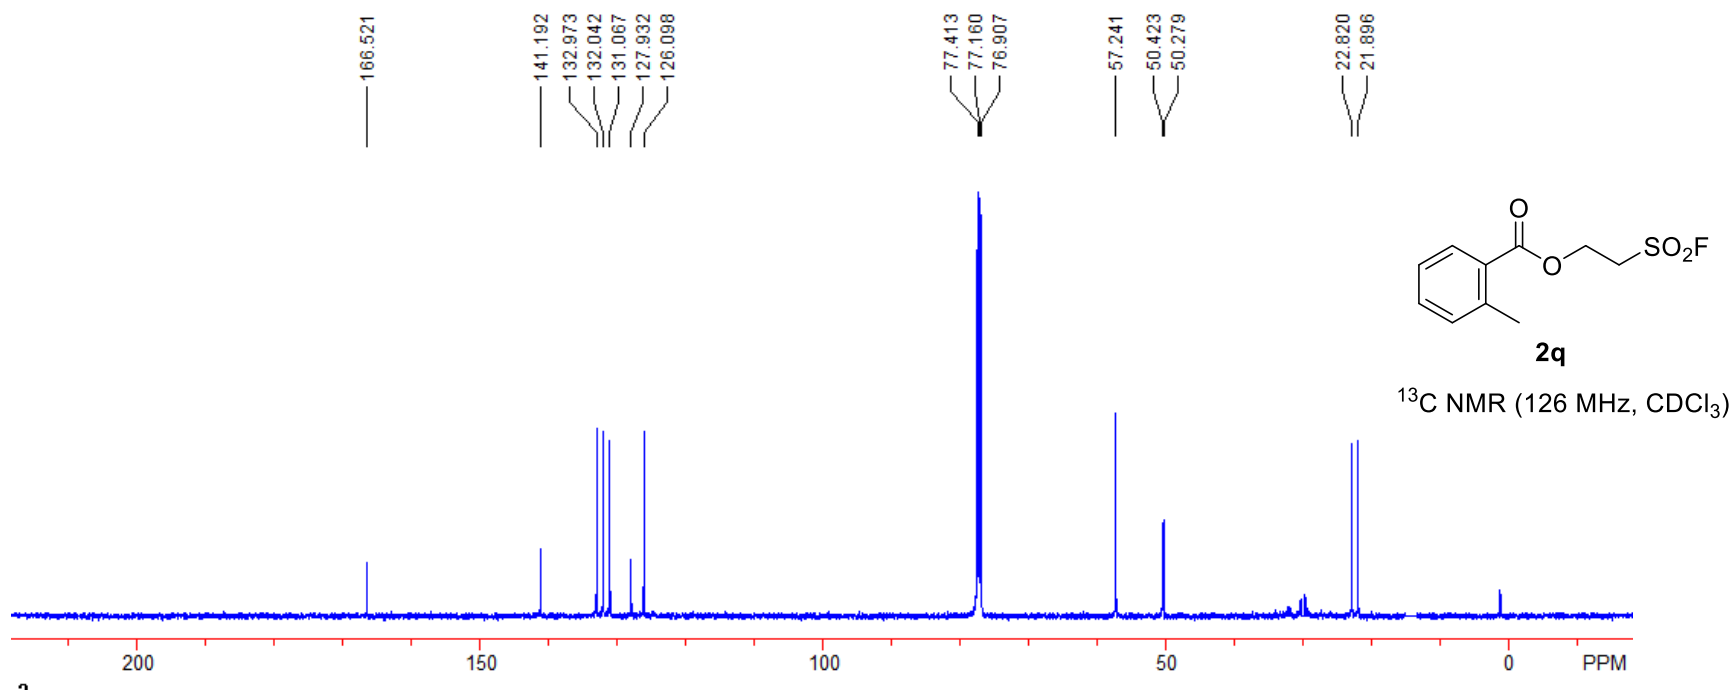

**Figure S50.** The  $^{13}\text{C}$  NMR spectrum of **2q**

**2q**,  $^{19}\text{F}$  NMR, 471 MHz,  $\text{CDCl}_3$

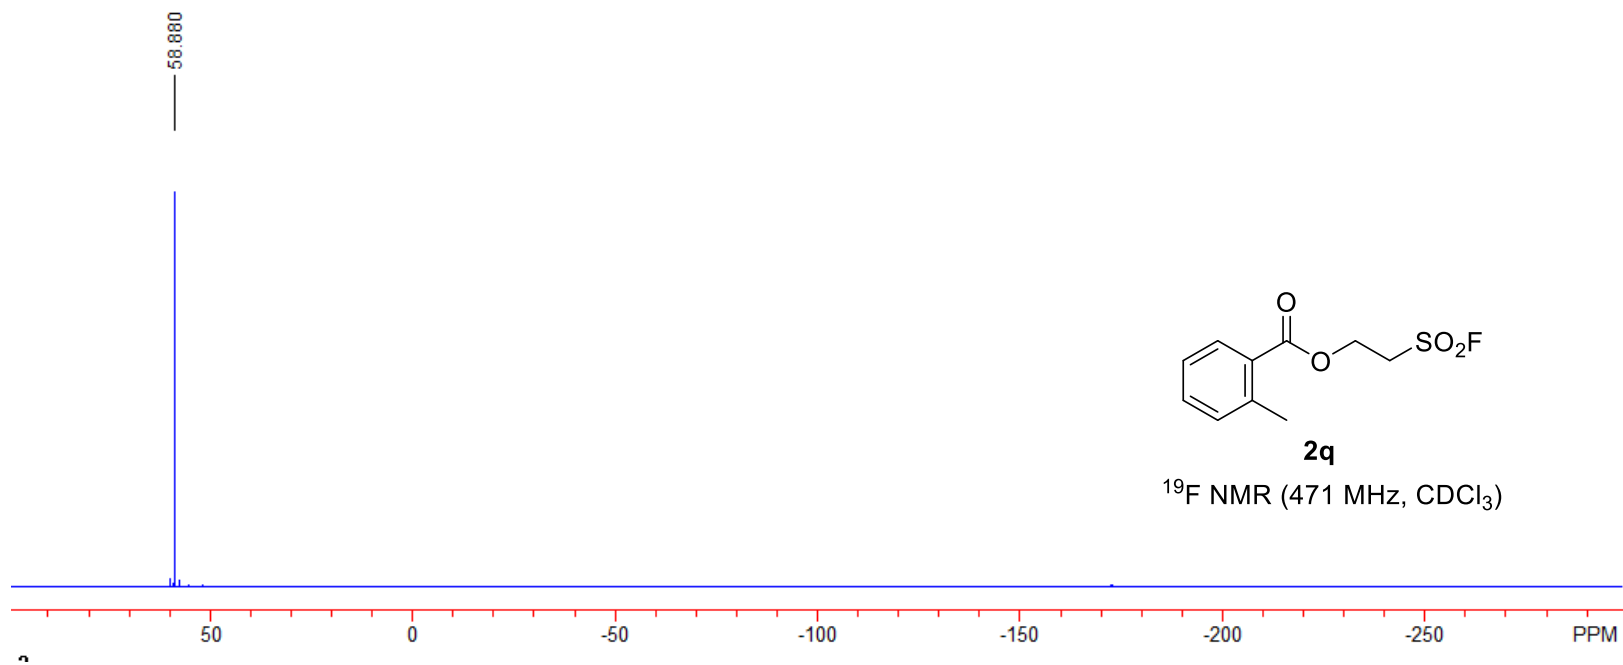

**Figure S51.** The  $^{19}\text{F}$  NMR spectrum of **2q**

**2r**,  $^1\text{H}$  NMR, 500 MHz,  $\text{CDCl}_3$

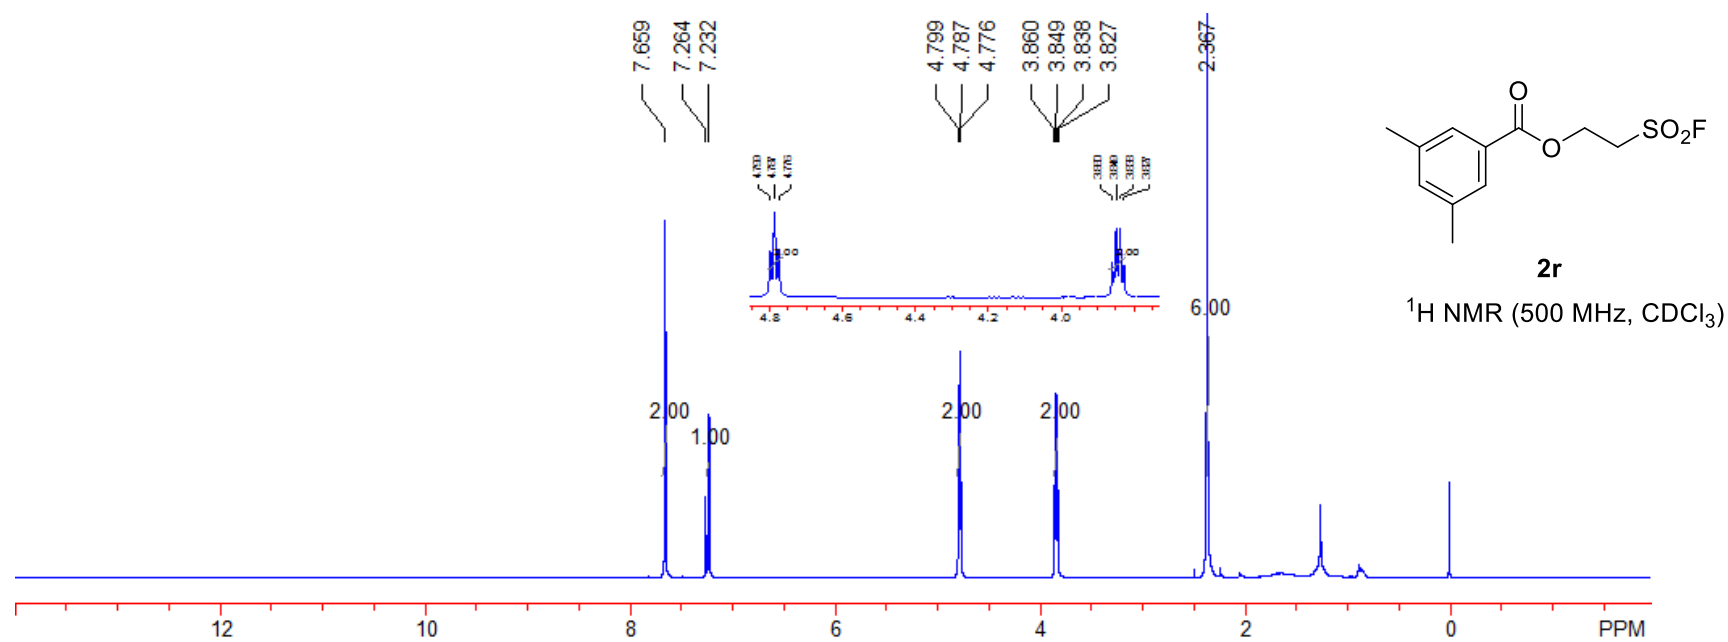

**Figure S52.** The  $^1\text{H}$  NMR spectrum of **2r**

**2r**,  $^{13}\text{C}$  NMR, 126 MHz,  $\text{CDCl}_3$

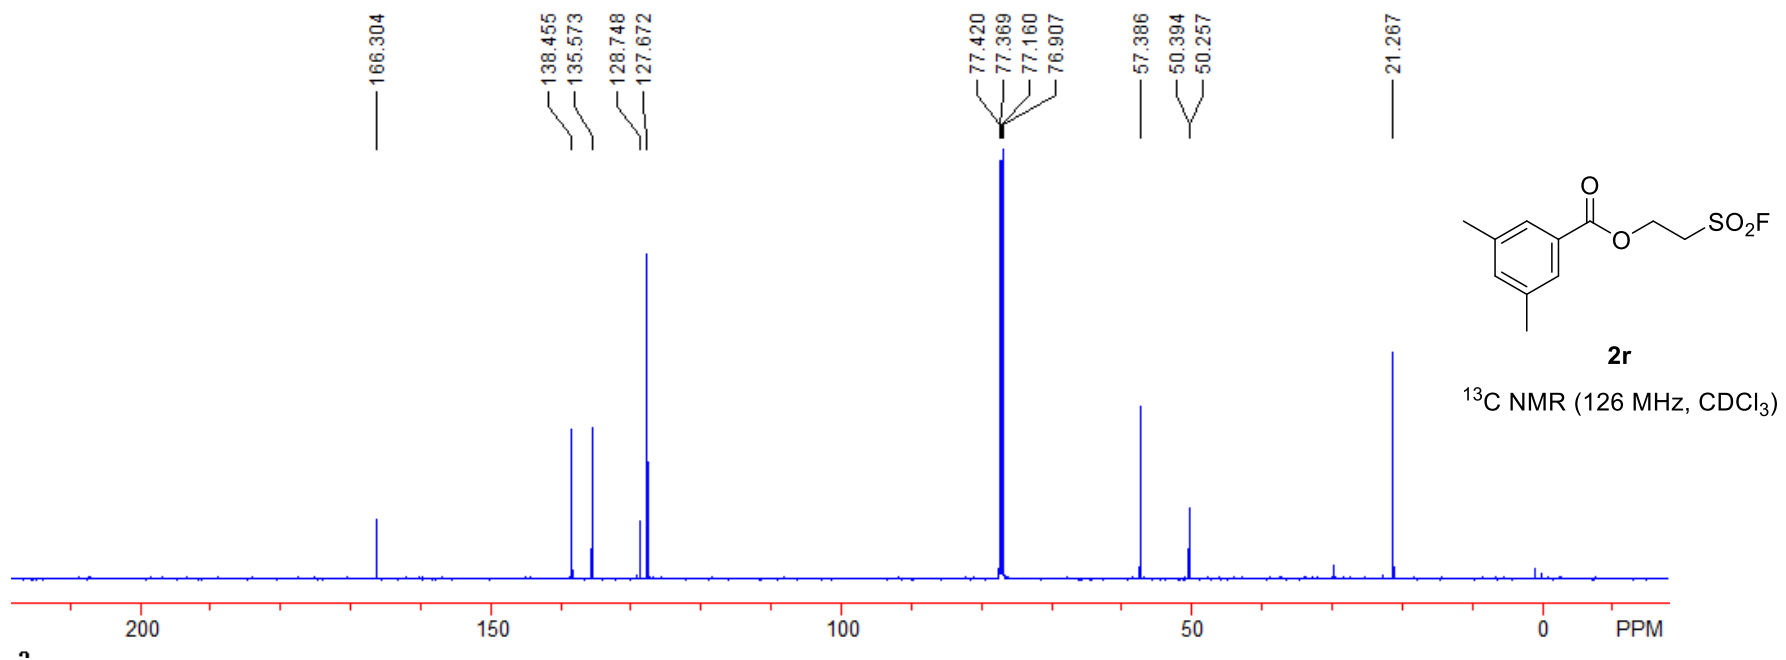

**Figure S53.** The  $^{13}\text{C}$  NMR spectrum of **2r**

**2r**,  $^{19}\text{F}$  NMR, 471 MHz,  $\text{CDCl}_3$

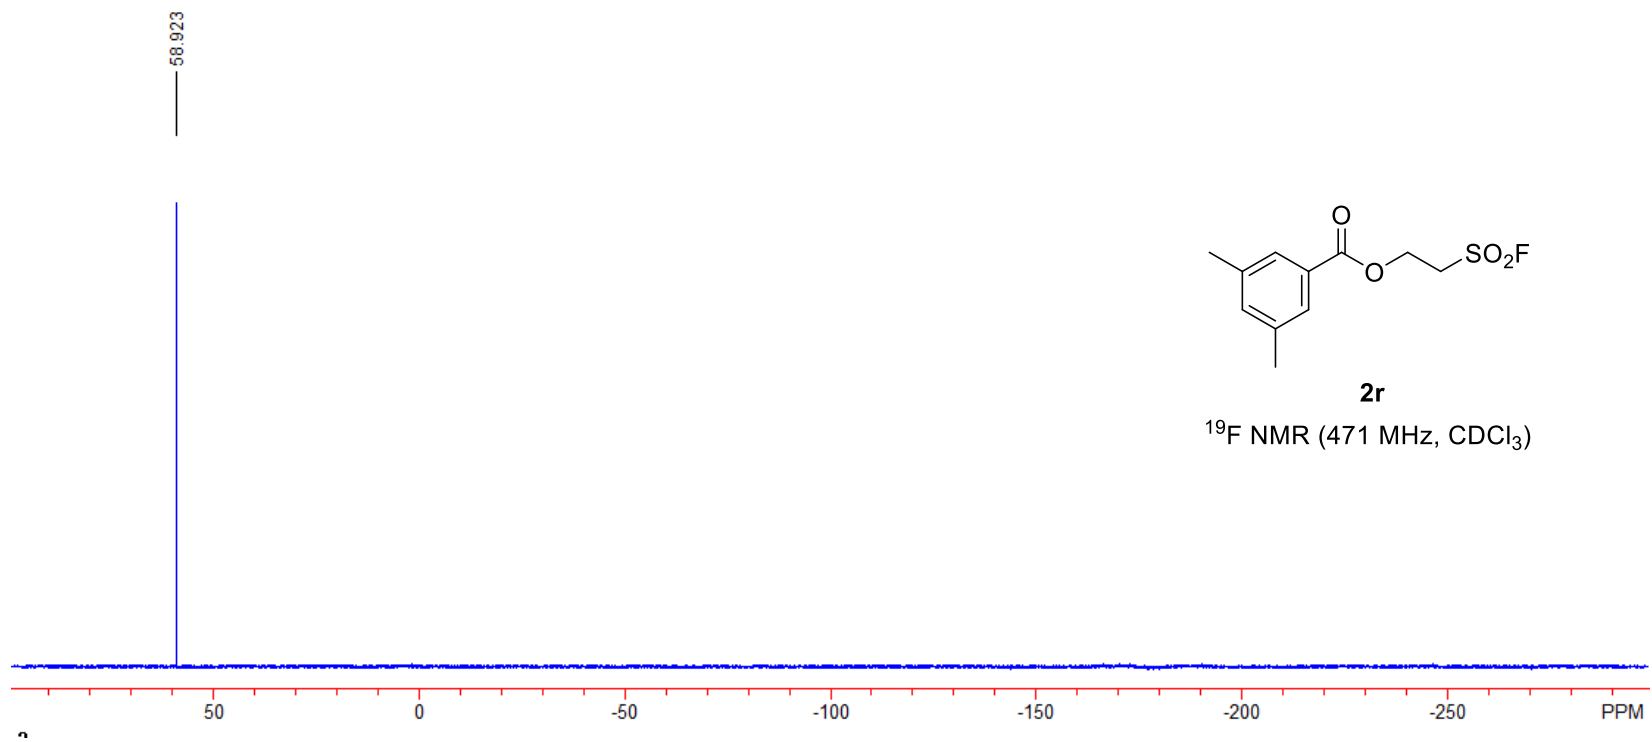

**Figure S54.** The  $^{19}\text{F}$  NMR spectrum of **2r**



2s,  $^1\text{H}$  NMR, 500 MHz,  $\text{CDCl}_3$

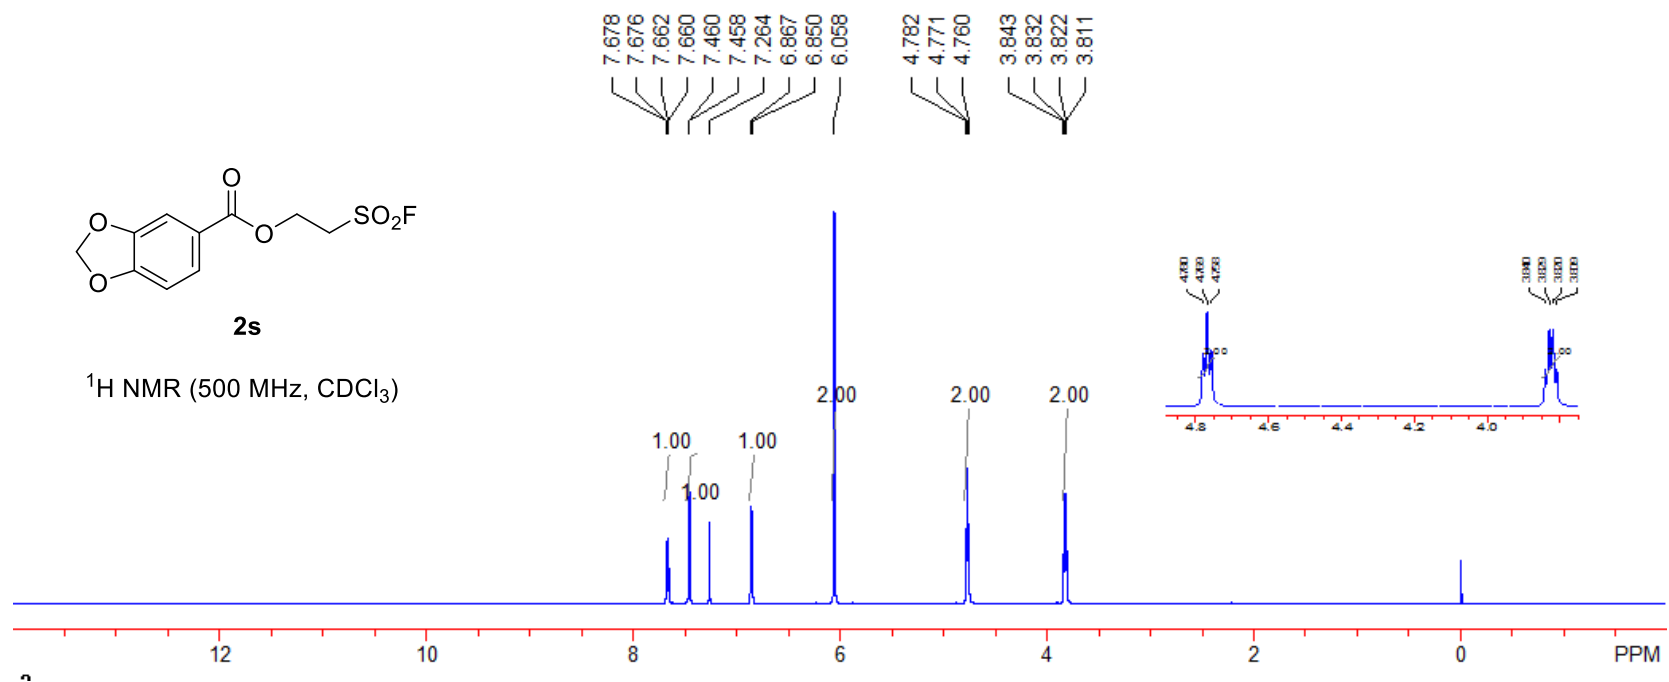

Figure S55. The  $^1\text{H}$  NMR spectrum of **2s**

**2s**,  $^{13}\text{C}$  NMR, 126 MHz,  $\text{CDCl}_3$

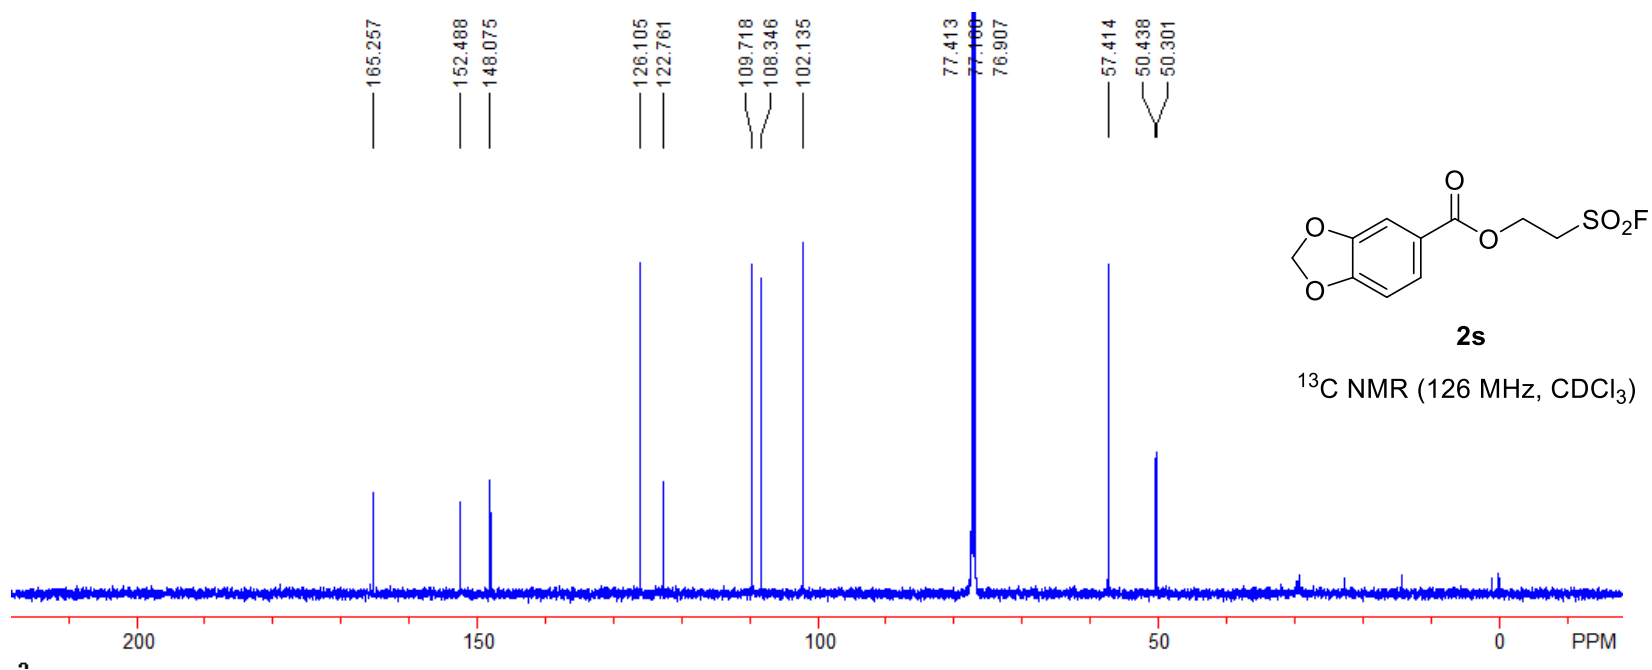

**Figure S56.** The  $^{13}\text{C}$  NMR spectrum of **2s**

**2s**,  $^{19}\text{F}$  NMR, 471 MHz,  $\text{CDCl}_3$

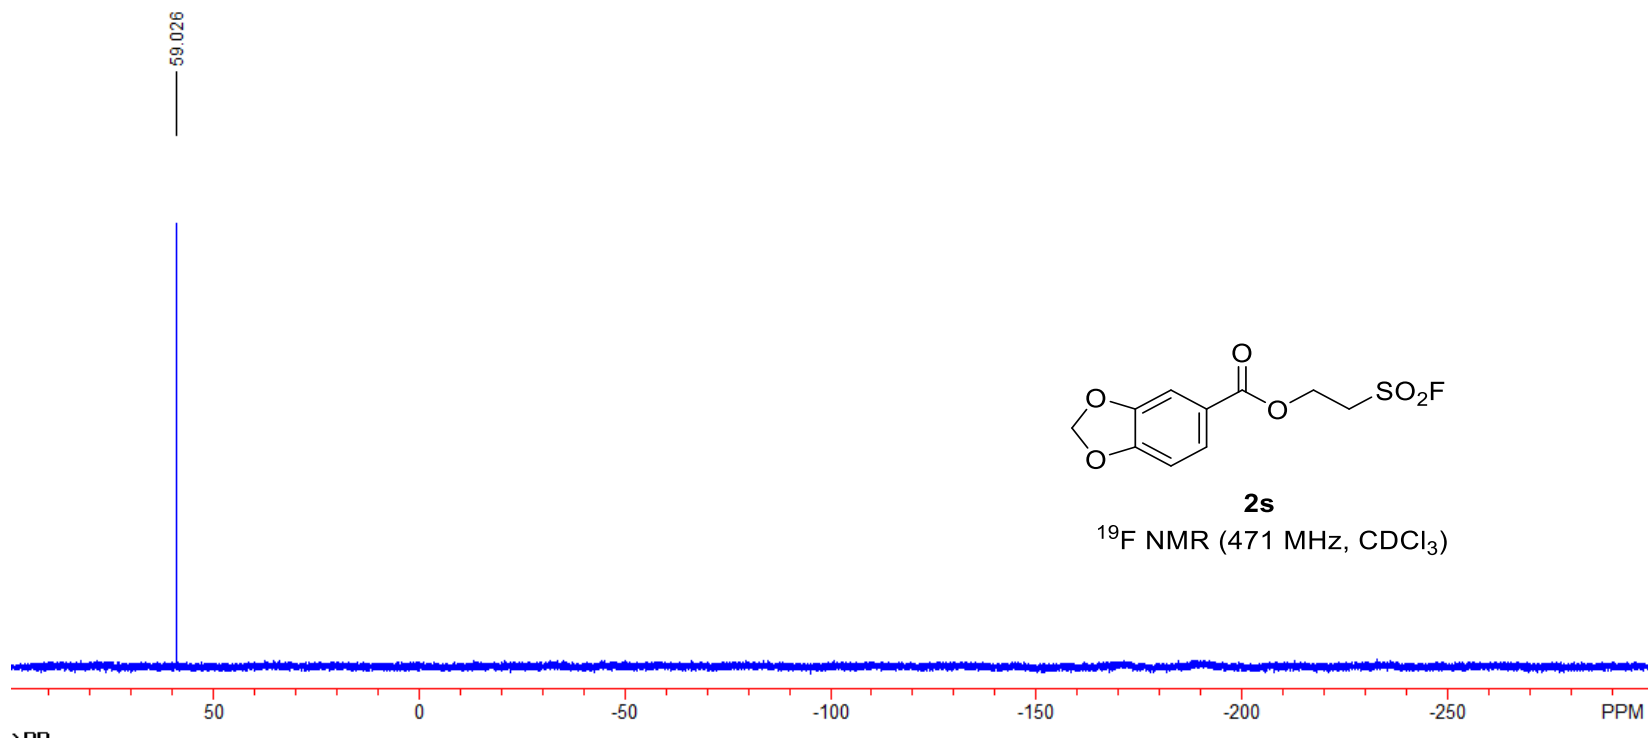

**Figure S57.** The  $^{19}\text{F}$  NMR spectrum of **2s**

**2t**,  $^1\text{H}$  NMR, 500 MHz,  $\text{CDCl}_3$

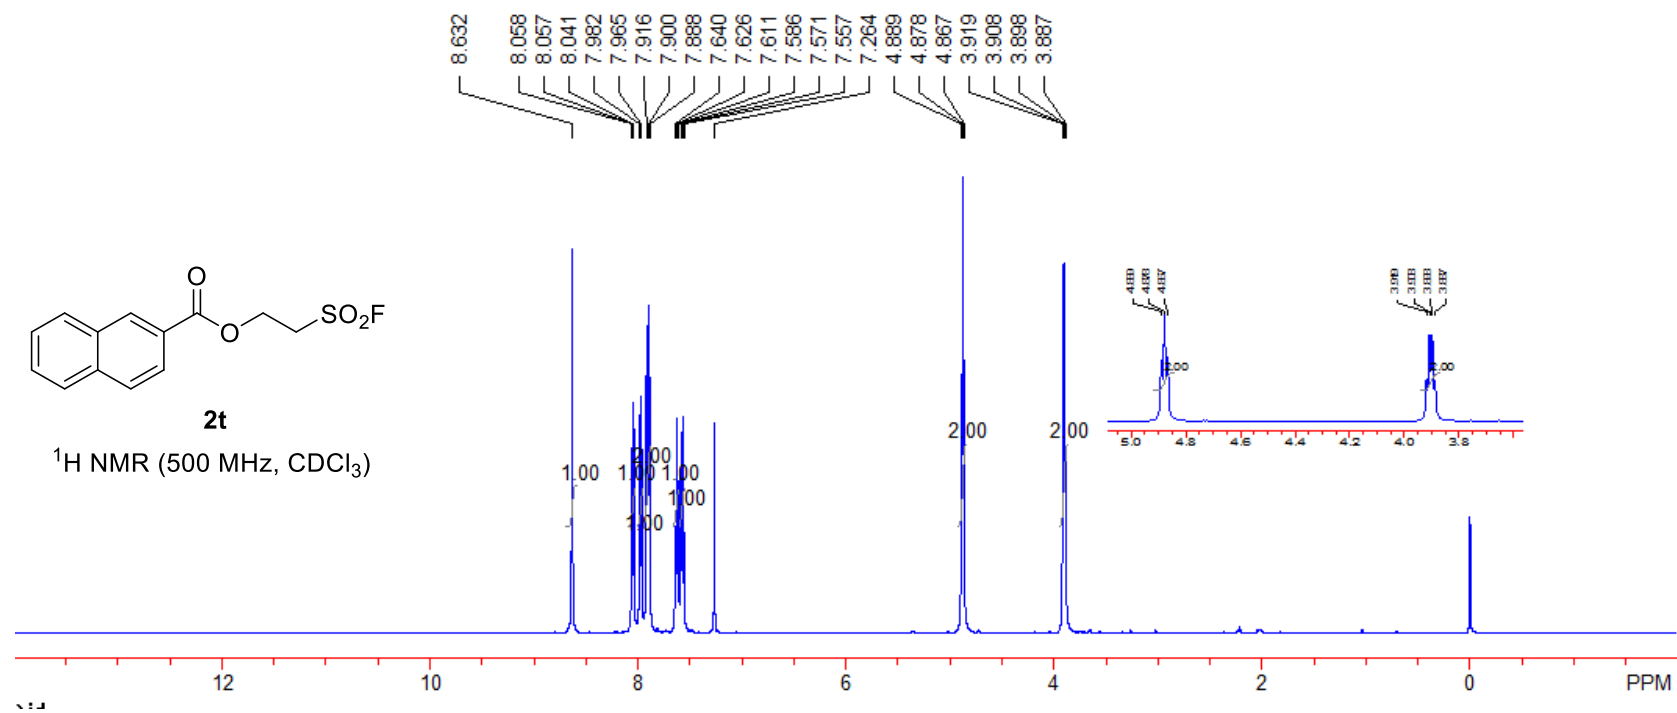

**Figure S58.** The  $^1\text{H}$  NMR spectrum of **2t**

**2t**,  $^{13}\text{C}$  NMR, 126 MHz,  $\text{CDCl}_3$

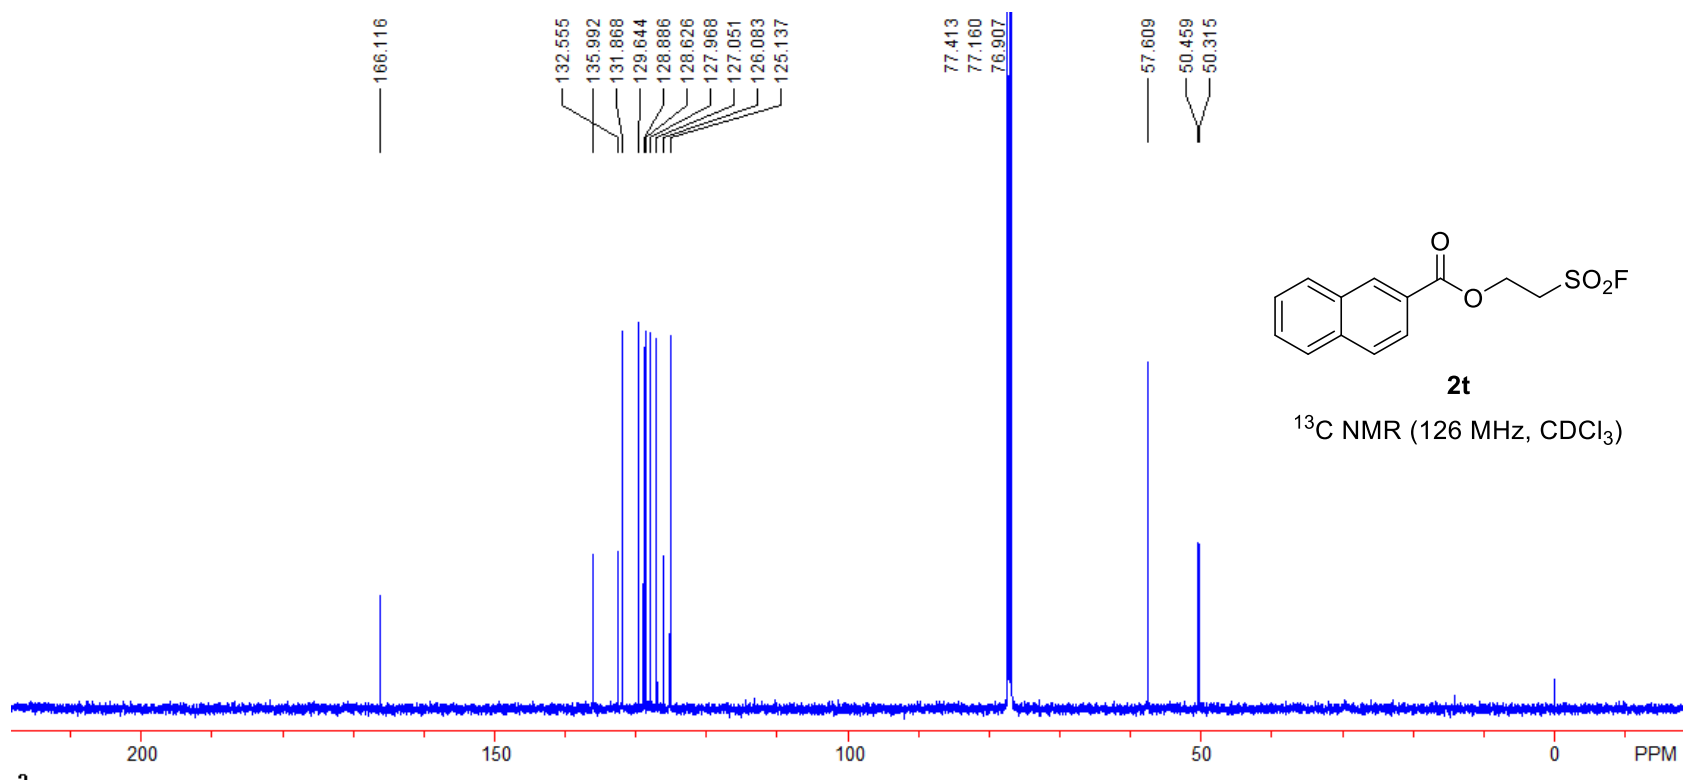

**Figure S59.** The  $^{13}\text{C}$  NMR spectrum of **2t**

**2t**,  $^{19}\text{F}$  NMR, 471 MHz,  $\text{CDCl}_3$

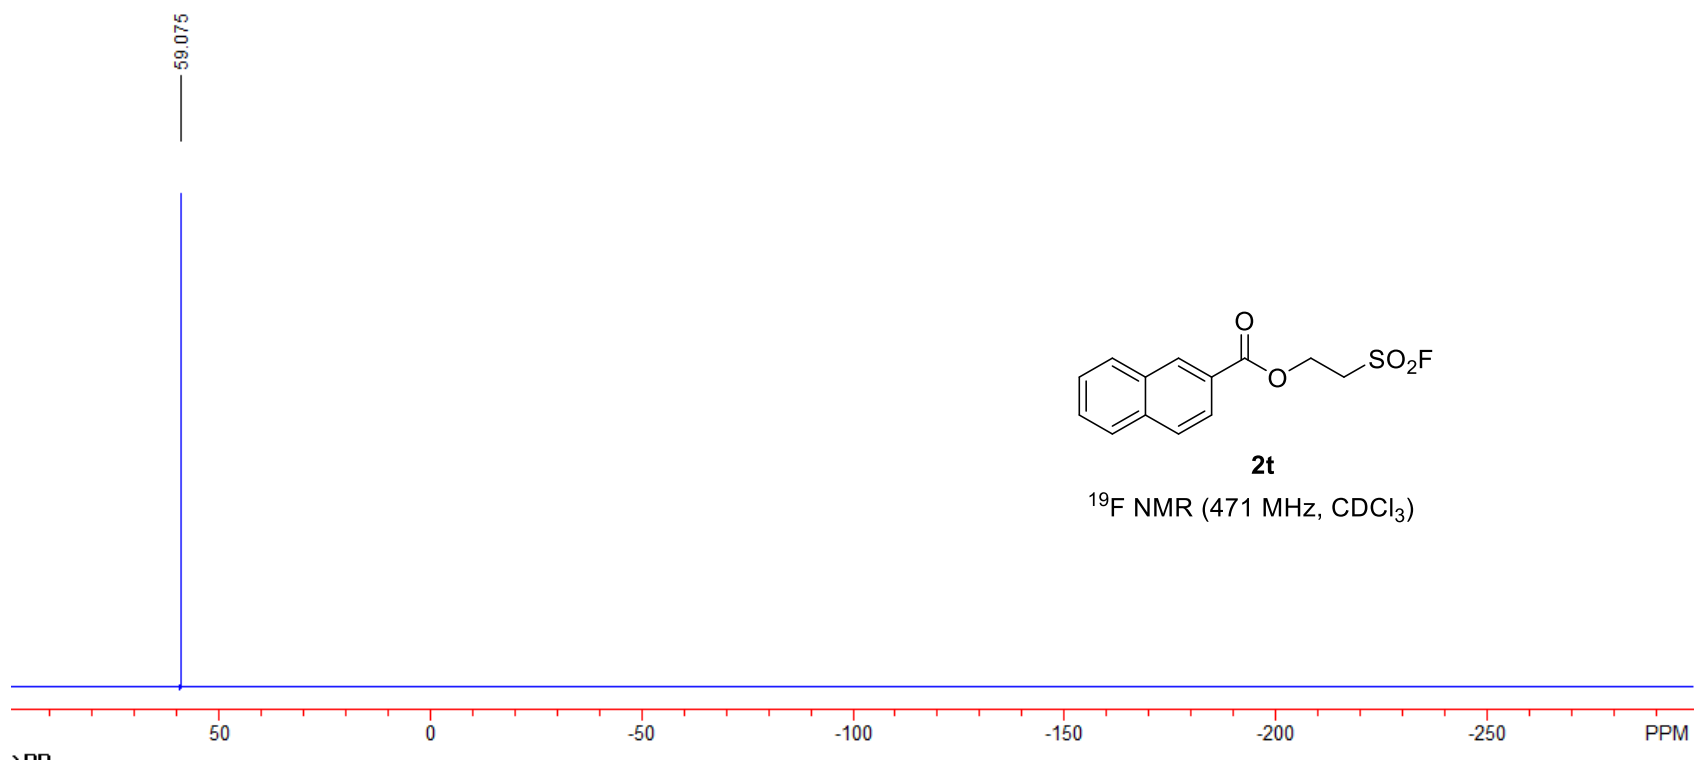

**Figure S60.** The  $^{19}\text{F}$  NMR spectrum of **2t**

**2u**,  $^1\text{H}$  NMR, 500 MHz,  $\text{CDCl}_3$

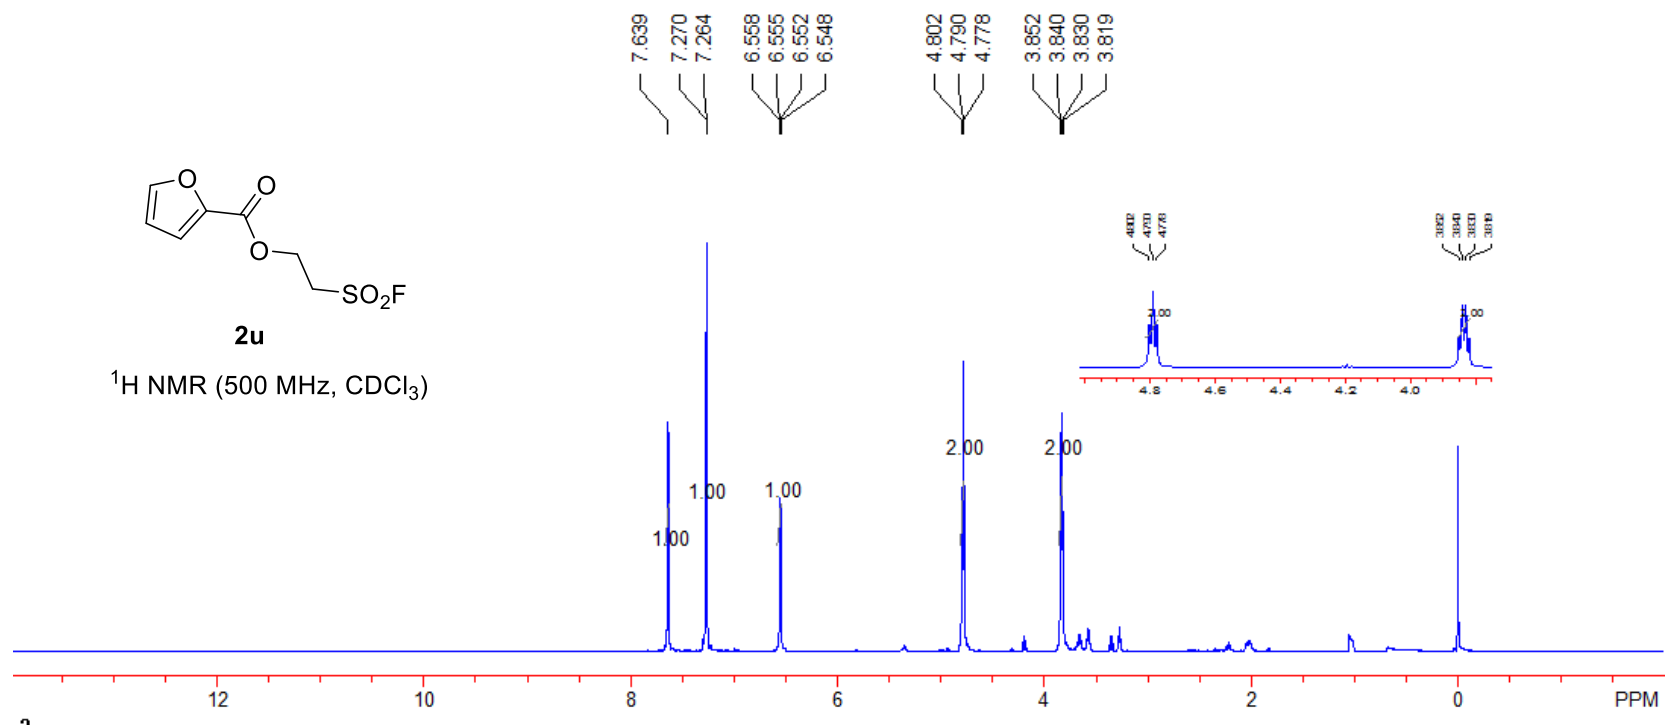

**Figure S61.** The  $^1\text{H}$  NMR spectrum of **2u**

**2u**,  $^{13}\text{C}$  NMR, 126 MHz,  $\text{CDCl}_3$

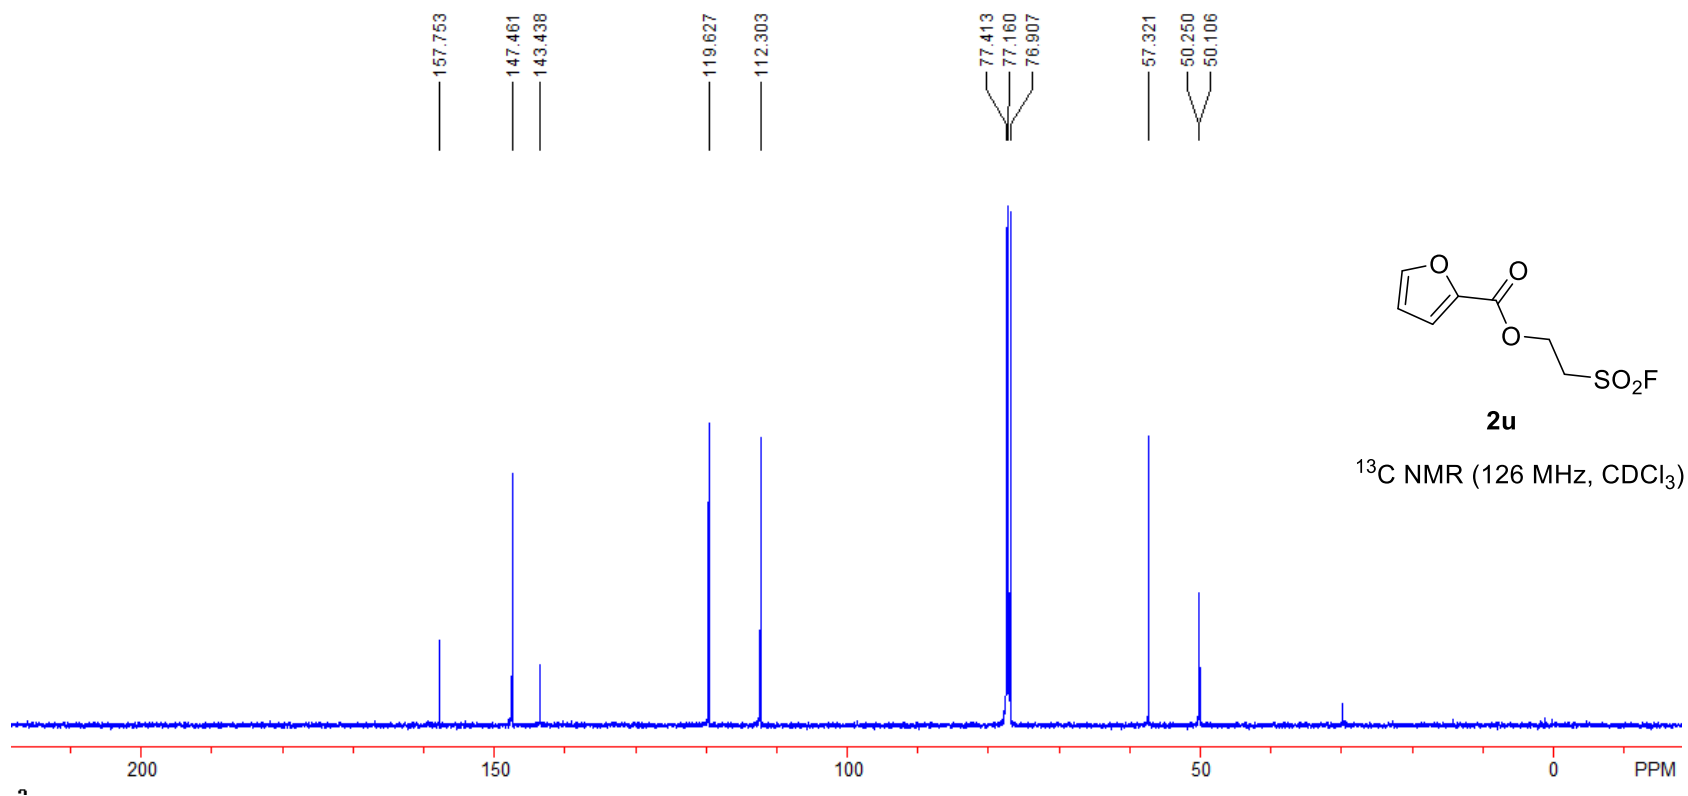

**Figure S62.** The  $^{13}\text{C}$  NMR spectrum of **2u**



**2u**,  $^{19}\text{F}$  NMR, 471 MHz,  $\text{CDCl}_3$

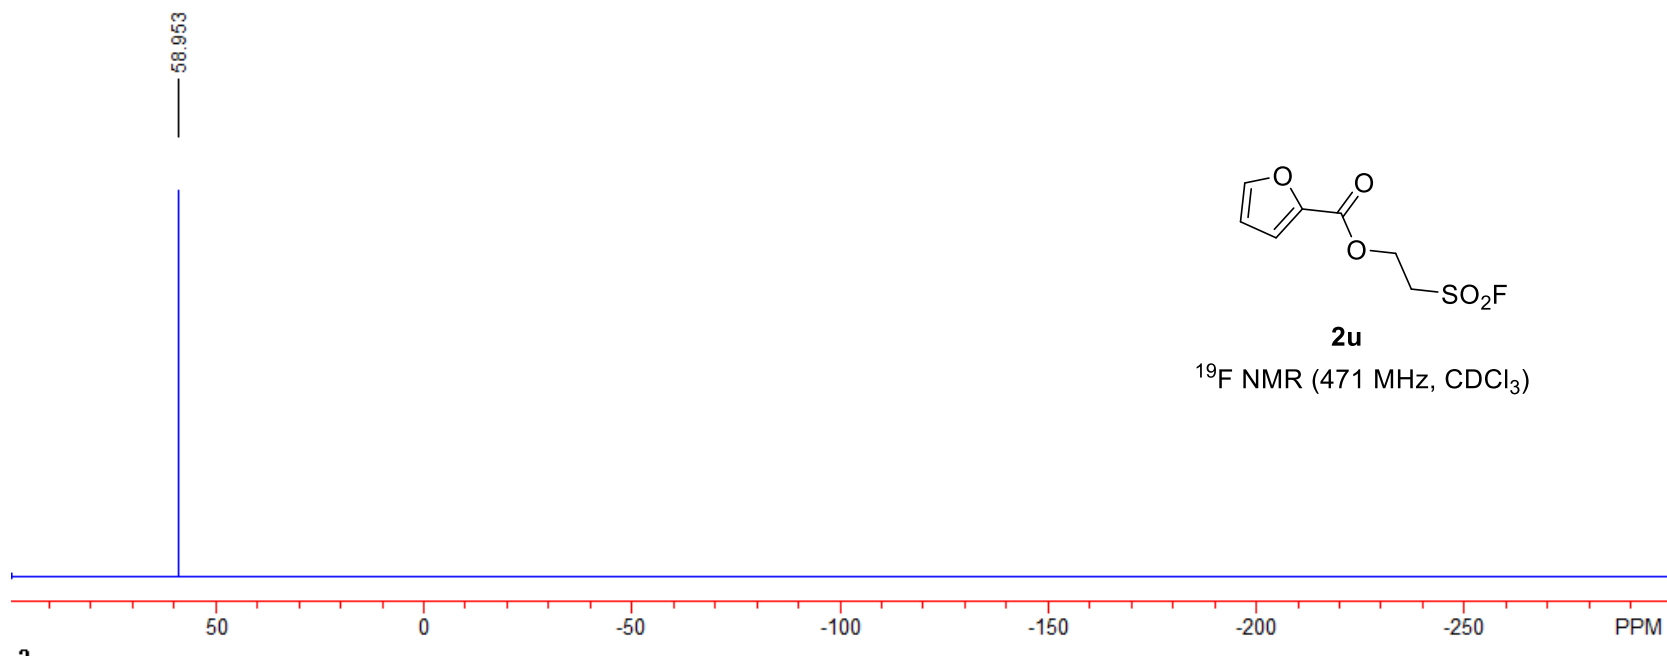

**Figure S63.** The  $^{19}\text{F}$  NMR spectrum of **2u**

**2v**,  $^1\text{H}$  NMR, 500 MHz,  $\text{CDCl}_3$

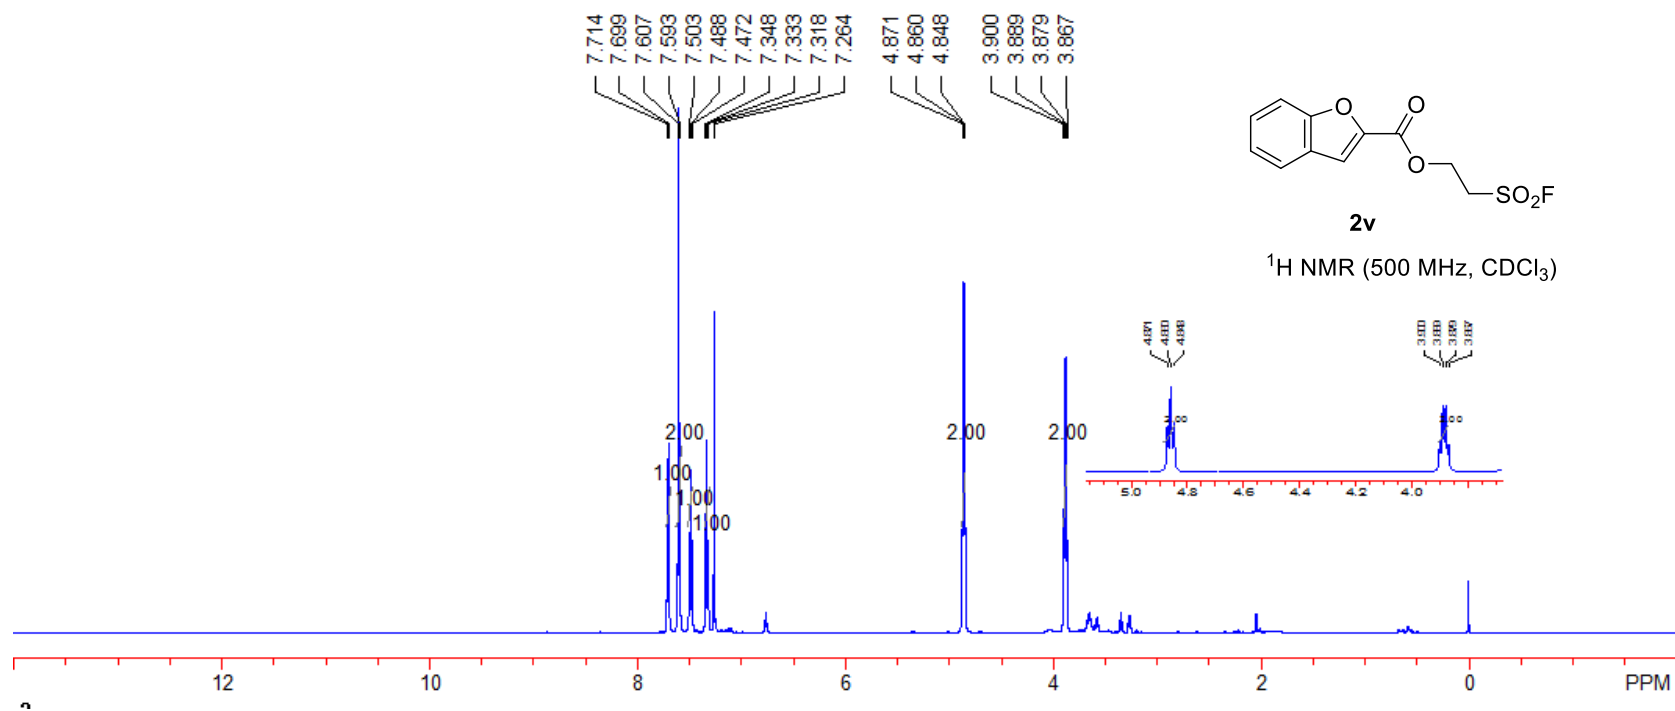

**Figure S64.** The  $^1\text{H}$  NMR spectrum of **2v**

**2v**,  $^{13}\text{C}$  NMR, 126 MHz,  $\text{CDCl}_3$

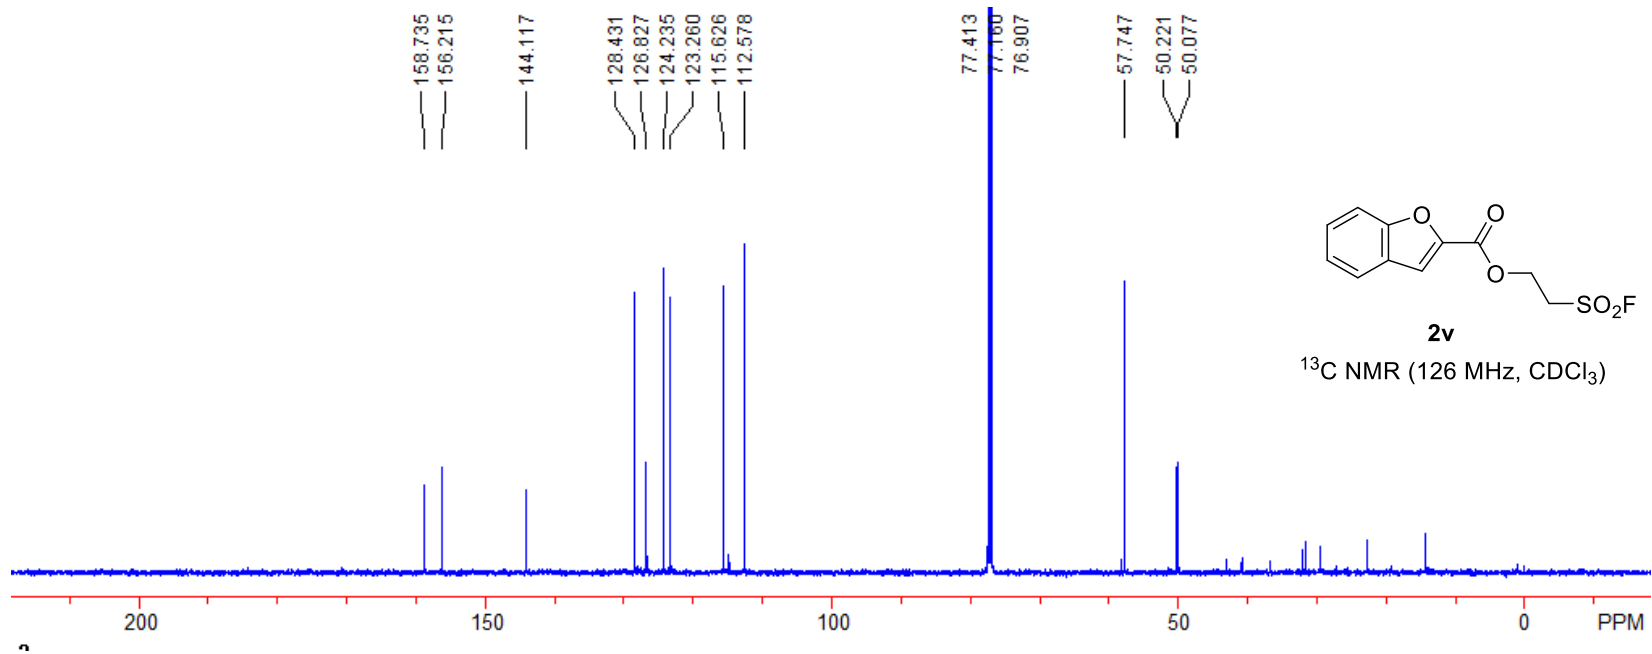

**Figure S65.** The  $^{13}\text{C}$  NMR spectrum of **2v**

**2v**,  $^{19}\text{F}$  NMR, 471 MHz,  $\text{CDCl}_3$

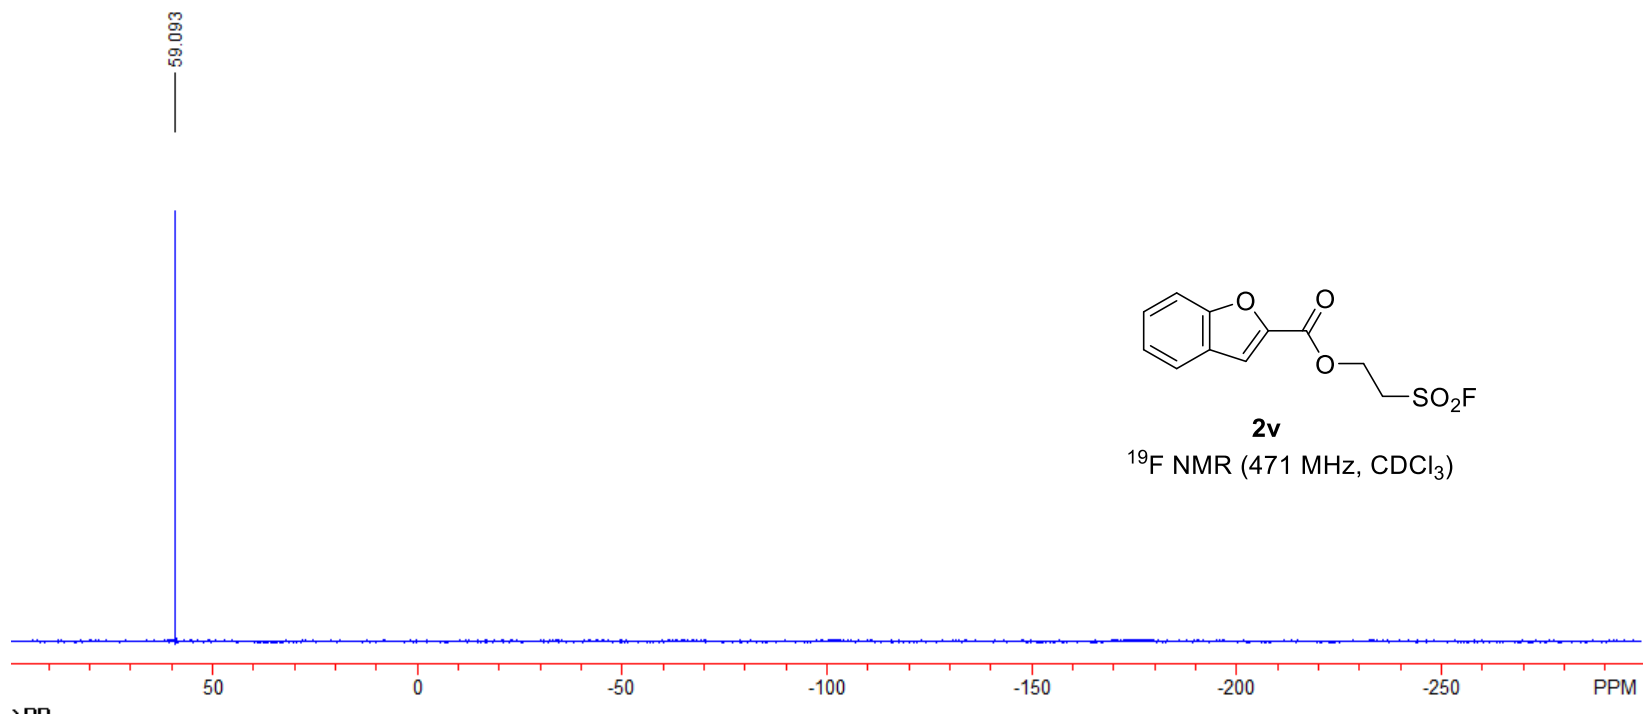

**Figure S66.** The  $^{19}\text{F}$  NMR spectrum of **2v**

**2w**,  $^1\text{H}$  NMR, 500 MHz,  $\text{CDCl}_3$

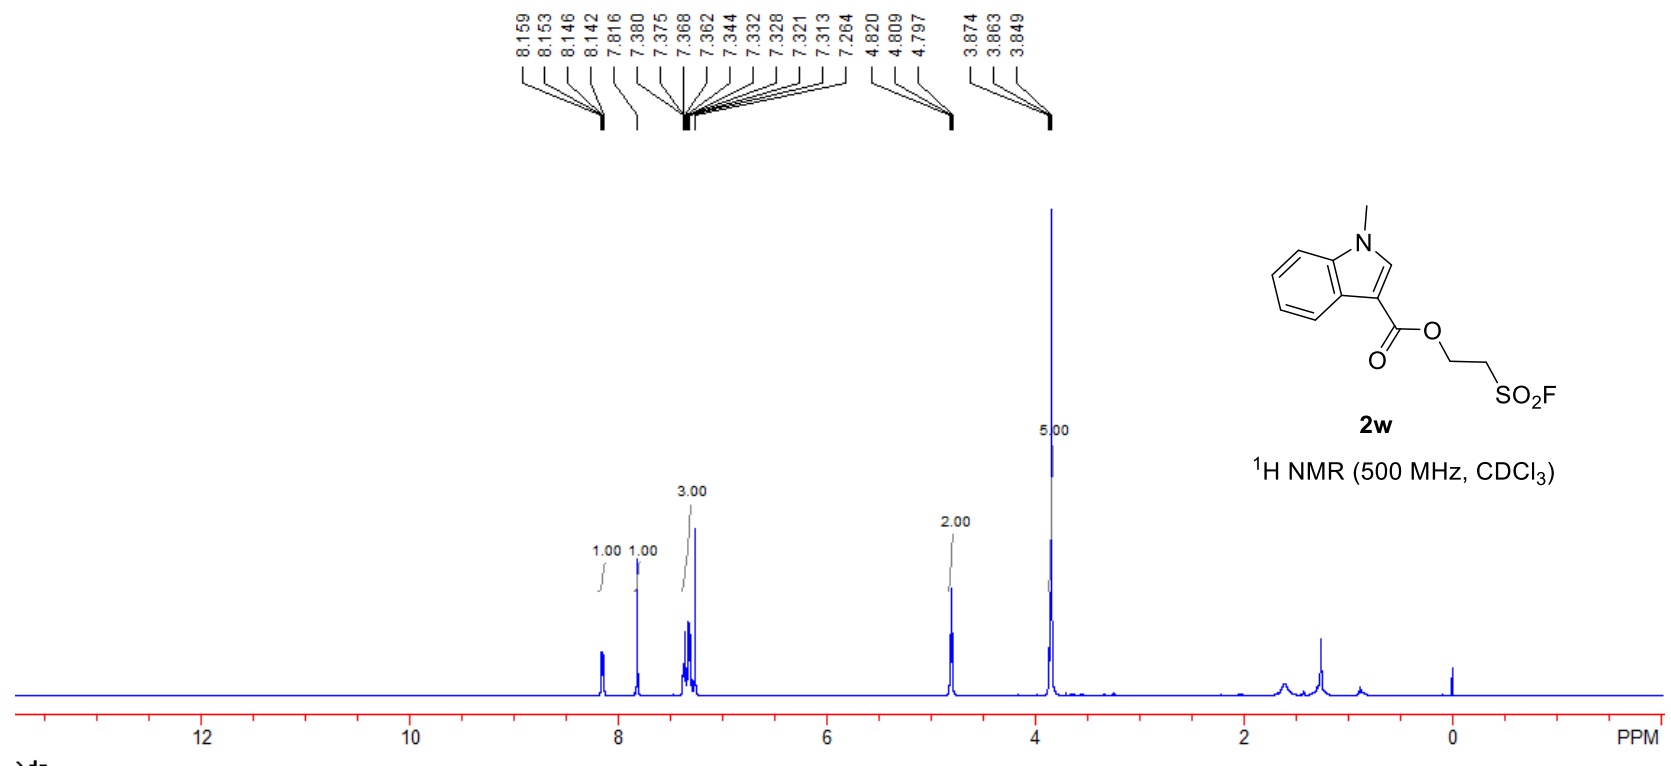

**Figure S67.** The  $^1\text{H}$  NMR spectrum of **2w**

**2w**,  $^{13}\text{C}$  NMR, 126 MHz,  $\text{CDCl}_3$

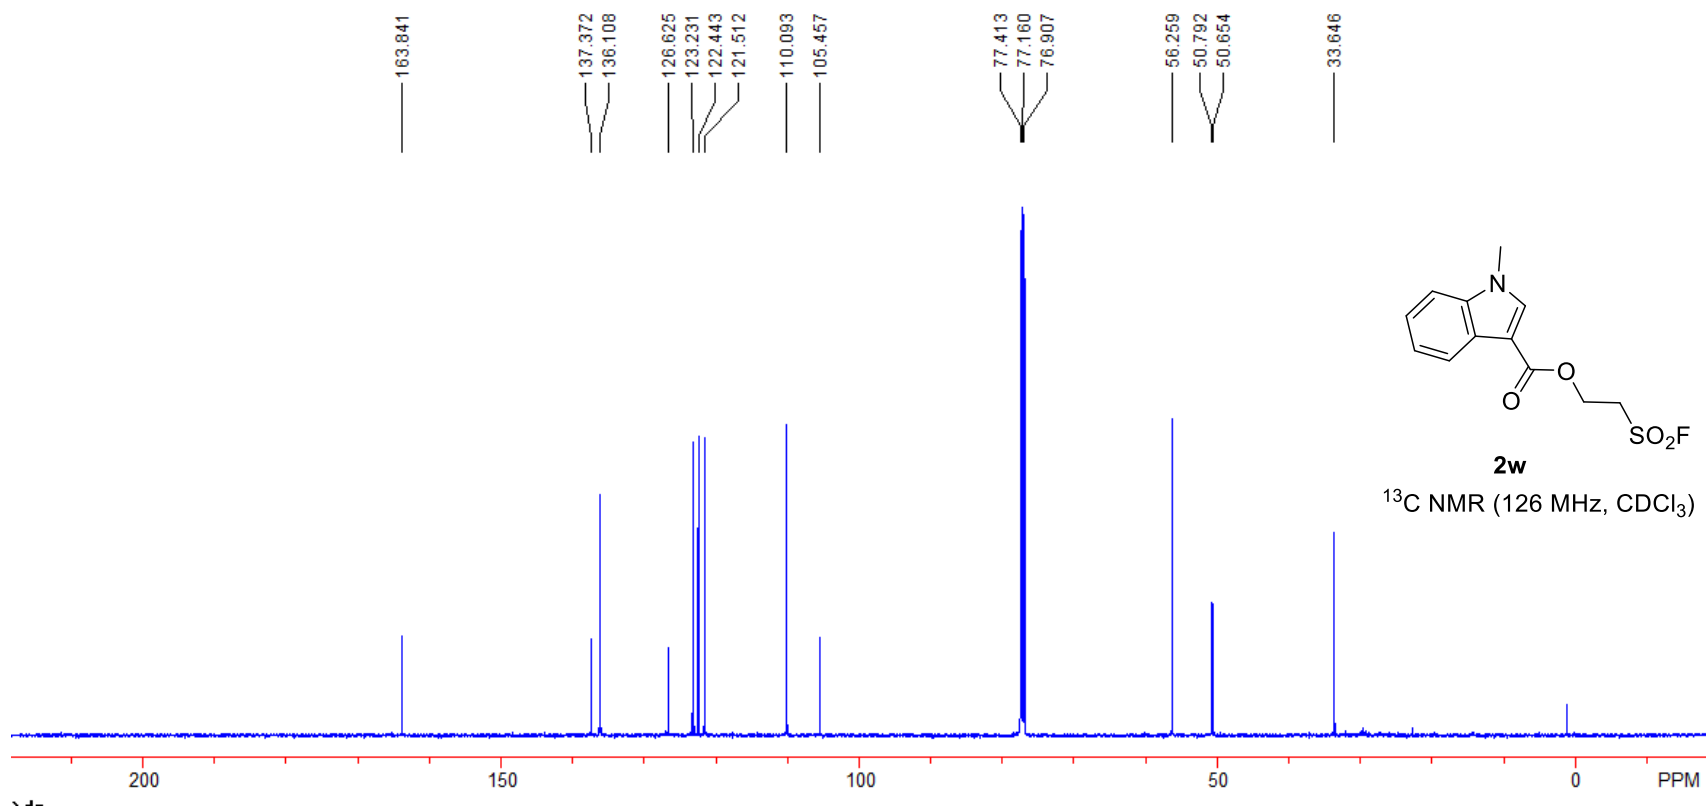

**Figure S68.** The  $^{13}\text{C}$  NMR spectrum of **2w**

**2w**,  $^{19}\text{F}$  NMR, 471 MHz,  $\text{CDCl}_3$

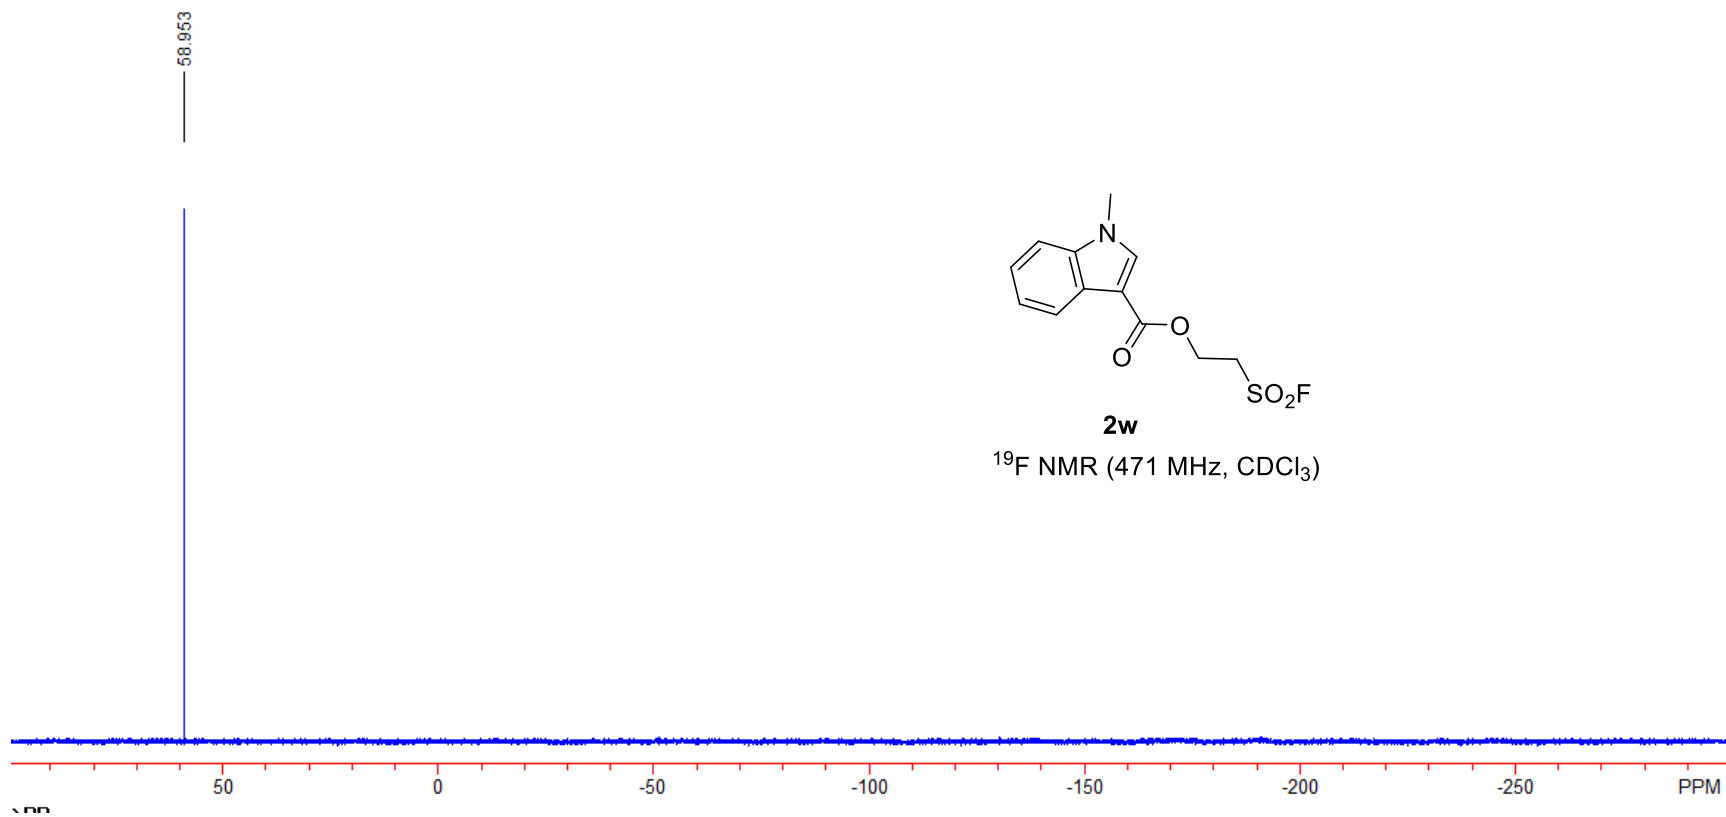

**Figure S69.** The  $^{19}\text{F}$  NMR spectrum of **2w**

**2x**,  $^1\text{H}$  NMR, 500 MHz,  $\text{CDCl}_3$

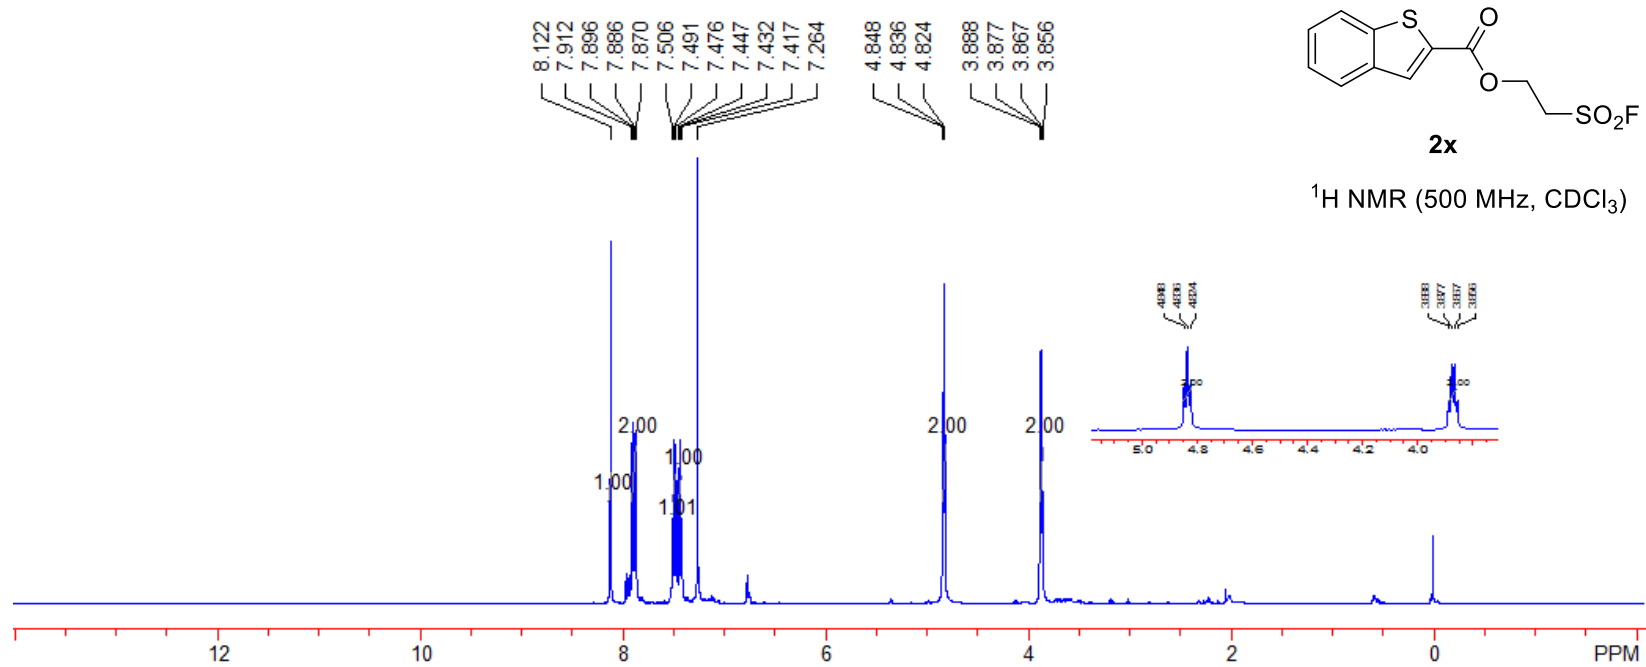

**Figure S70.** The  $^1\text{H}$  NMR spectrum of **2x**



**2x**,  $^{13}\text{C}$  NMR, 126 MHz,  $\text{CDCl}_3$

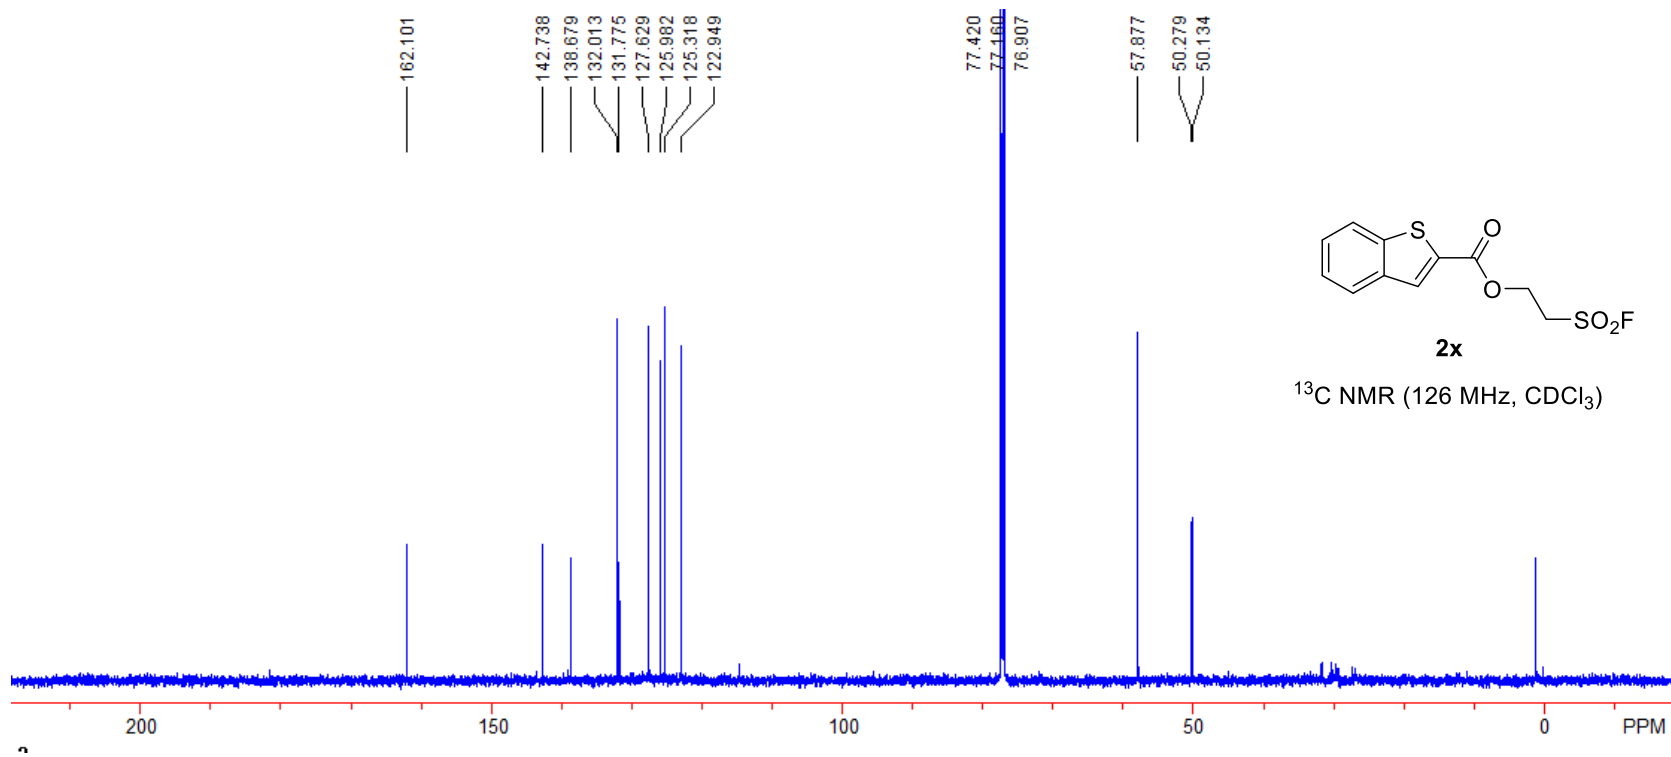

**Figure S71.** The  $^{13}\text{C}$  NMR spectrum of **2x**

**2x**,  $^{19}\text{F}$  NMR, 471 MHz,  $\text{CDCl}_3$

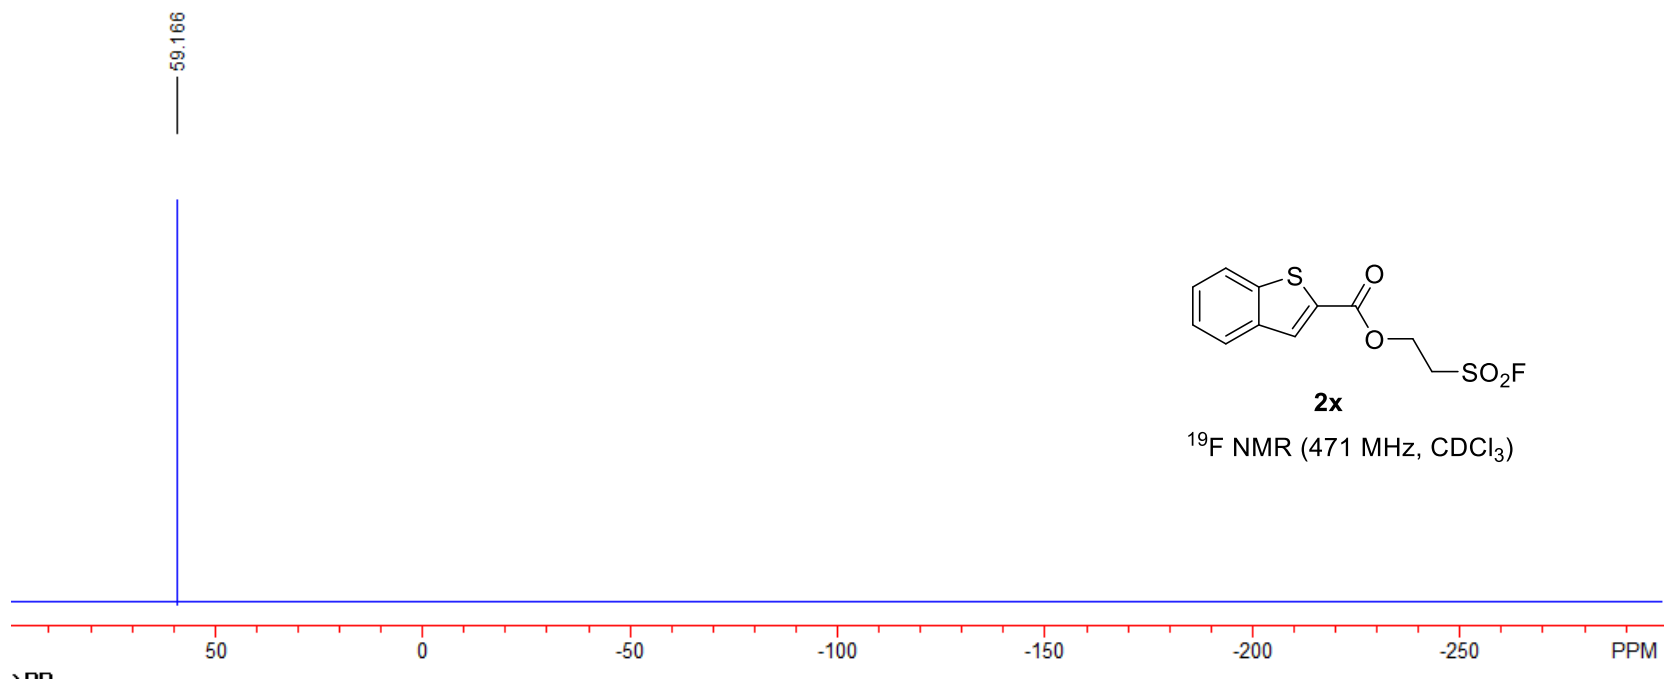

**Figure S72.** The  $^{19}\text{F}$  NMR spectrum of **2x**

**2y**,  $^1\text{H}$  NMR, 500 MHz,  $\text{CDCl}_3$

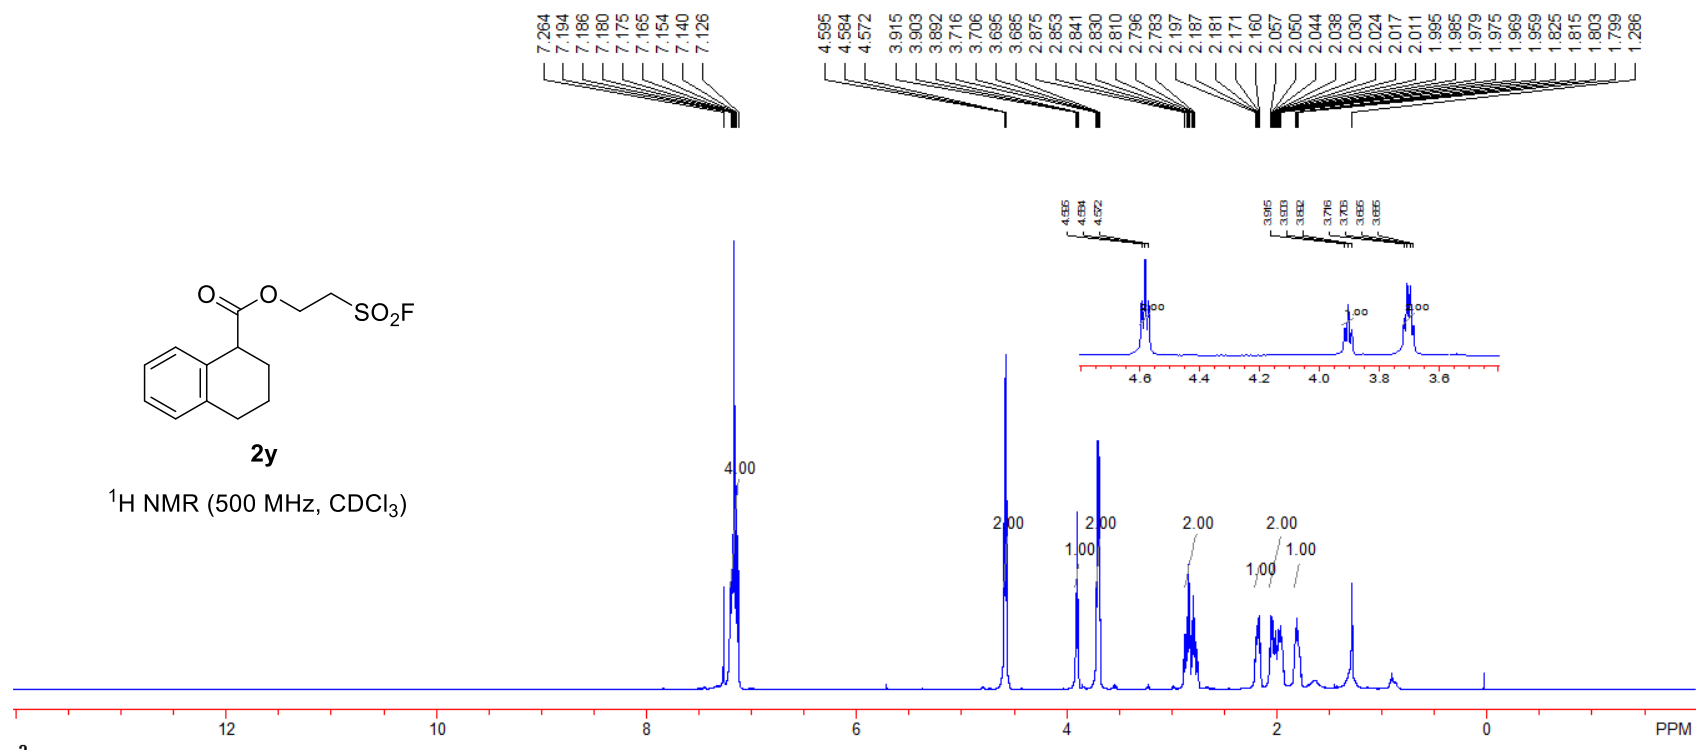

**Figure S73.** The  $^1\text{H}$  NMR spectrum of **2y**

**2y**,  $^{13}\text{C}$  NMR, 126 MHz,  $\text{CDCl}_3$

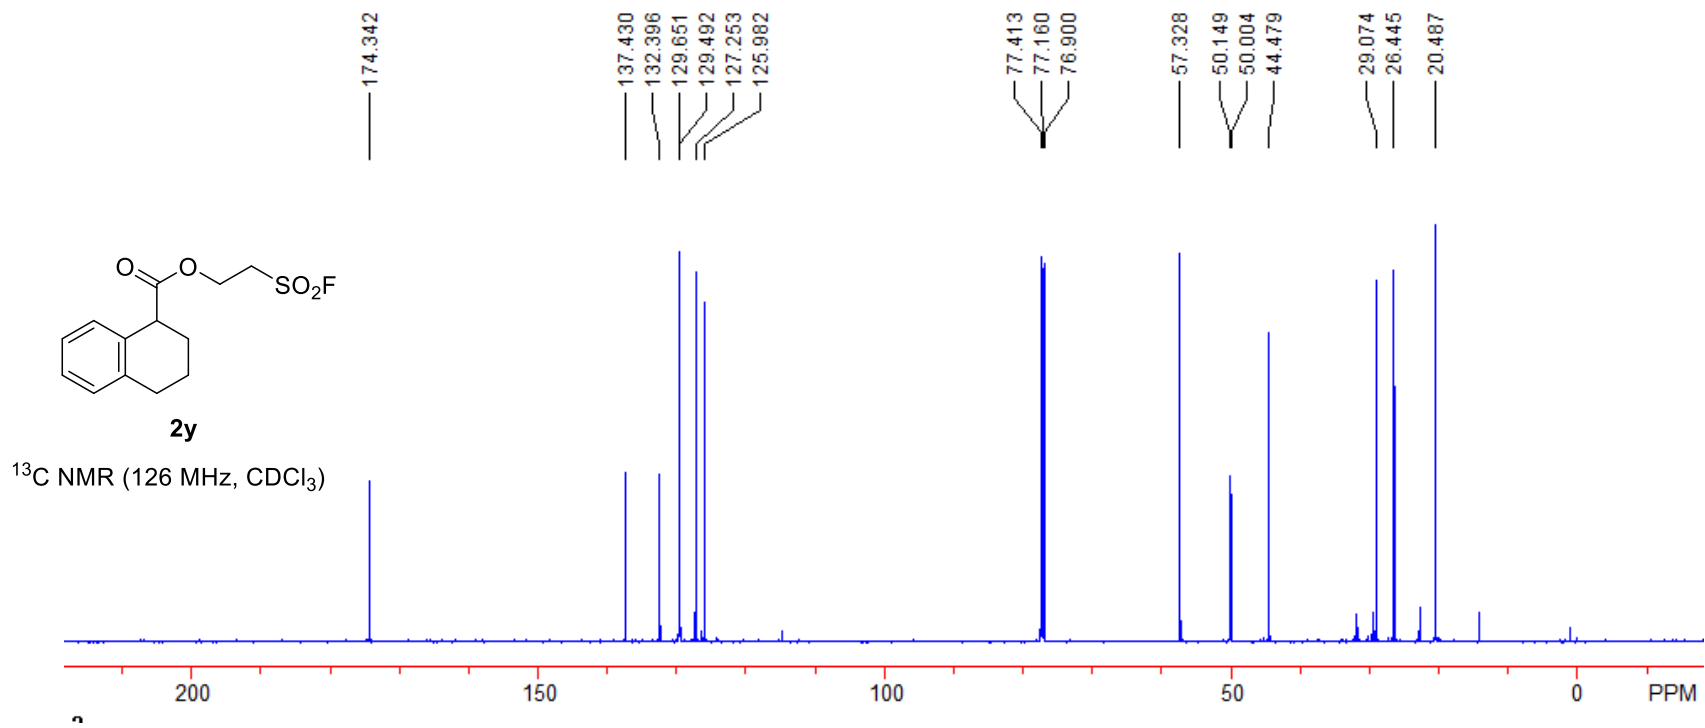

**Figure S74.** The  $^{13}\text{C}$  NMR spectrum of **2y**

**2y**,  $^{19}\text{F}$  NMR, 471 MHz,  $\text{CDCl}_3$

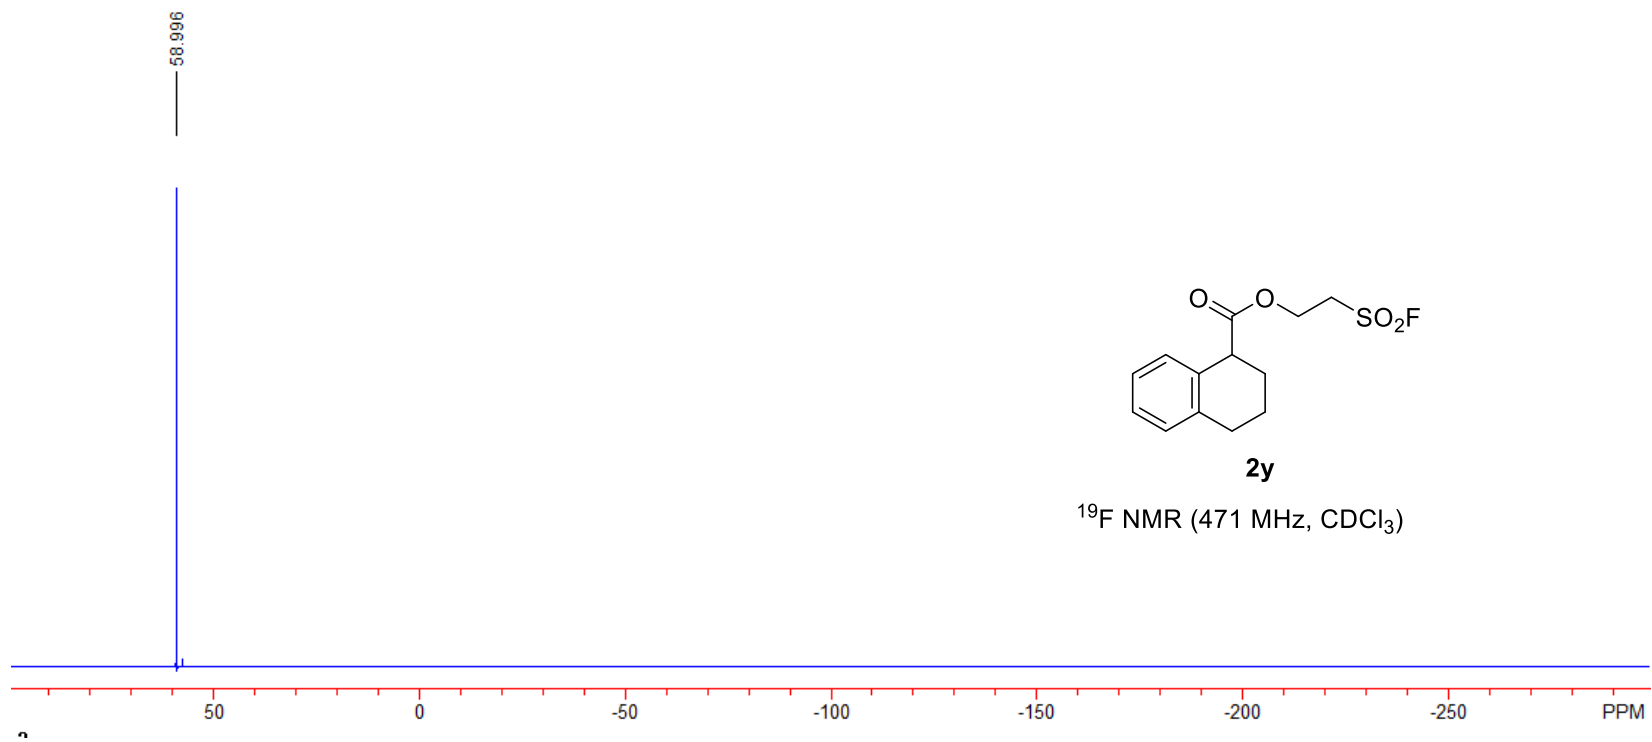

**Figure S75.** The  $^{19}\text{F}$  NMR spectrum of **2y**

**2z**,  $^1\text{H}$  NMR, 500 MHz,  $\text{CDCl}_3$

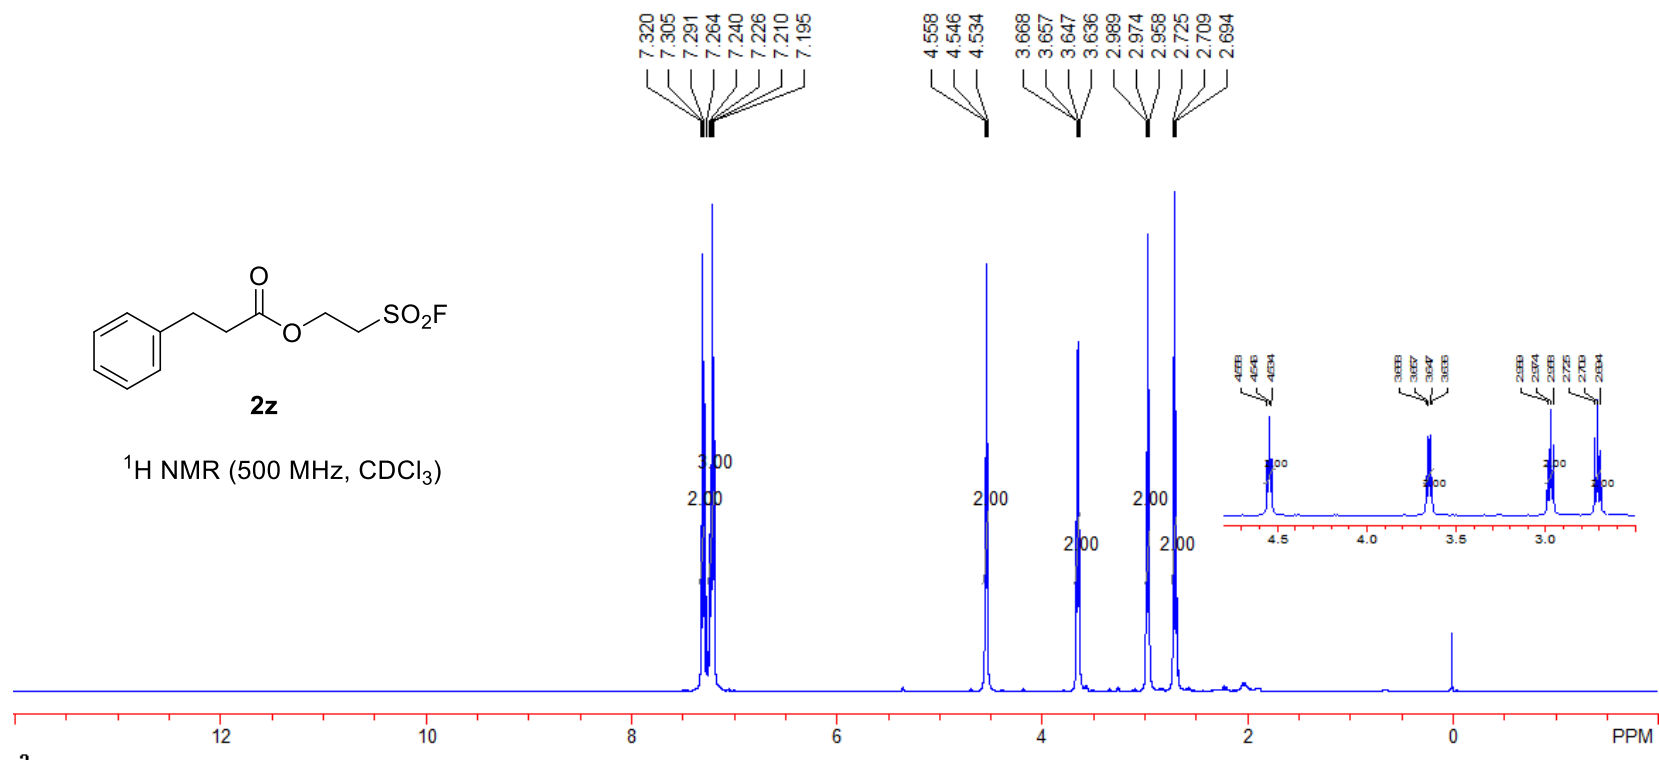

**Figure S76.** The  $^1\text{H}$  NMR spectrum of **2z**

**2z**,  $^{13}\text{C}$  NMR, 126 MHz,  $\text{CDCl}_3$

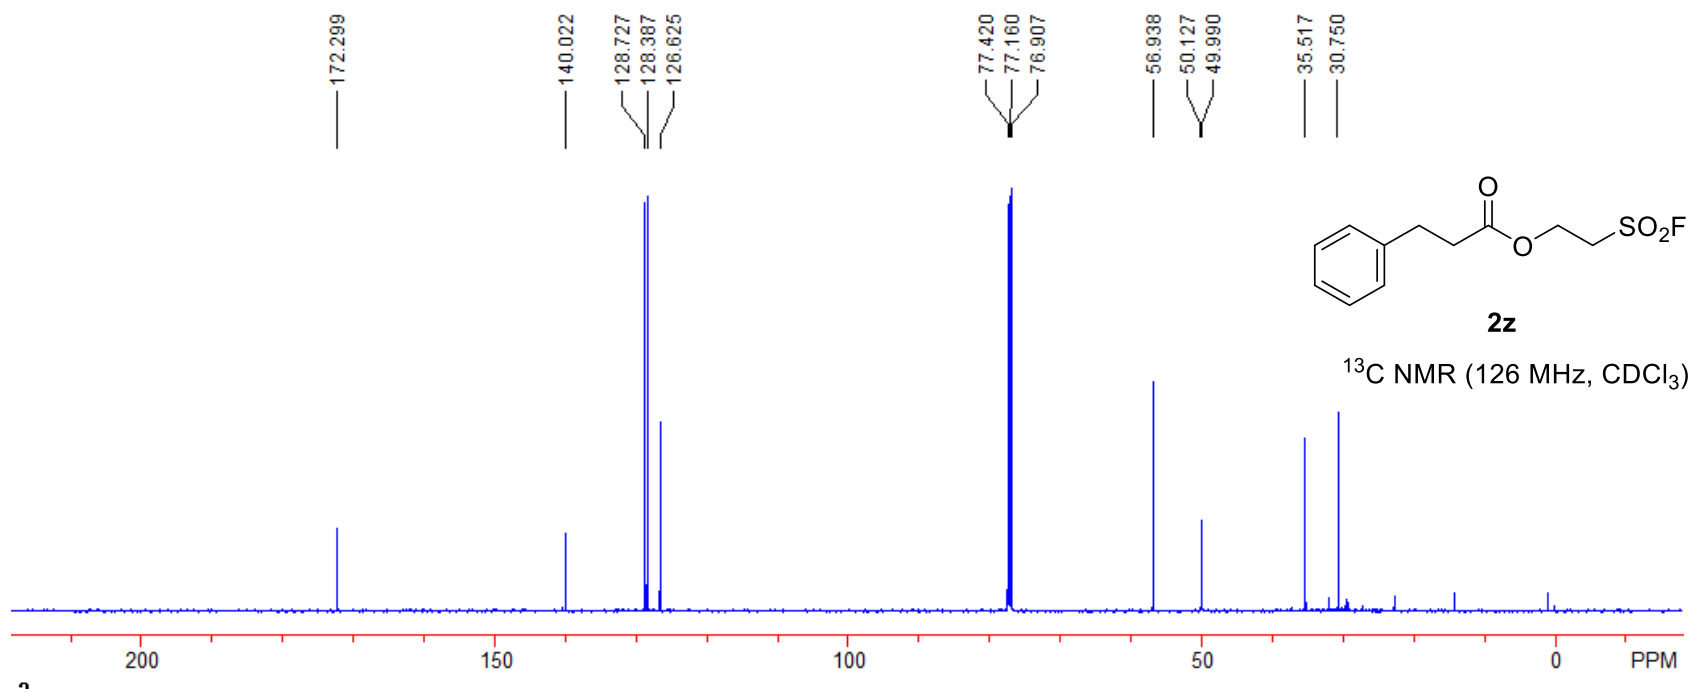

**Figure S77.** The  $^{13}\text{C}$  NMR spectrum of **2z**

**2z**,  $^{19}\text{F}$  NMR, 471 MHz,  $\text{CDCl}_3$

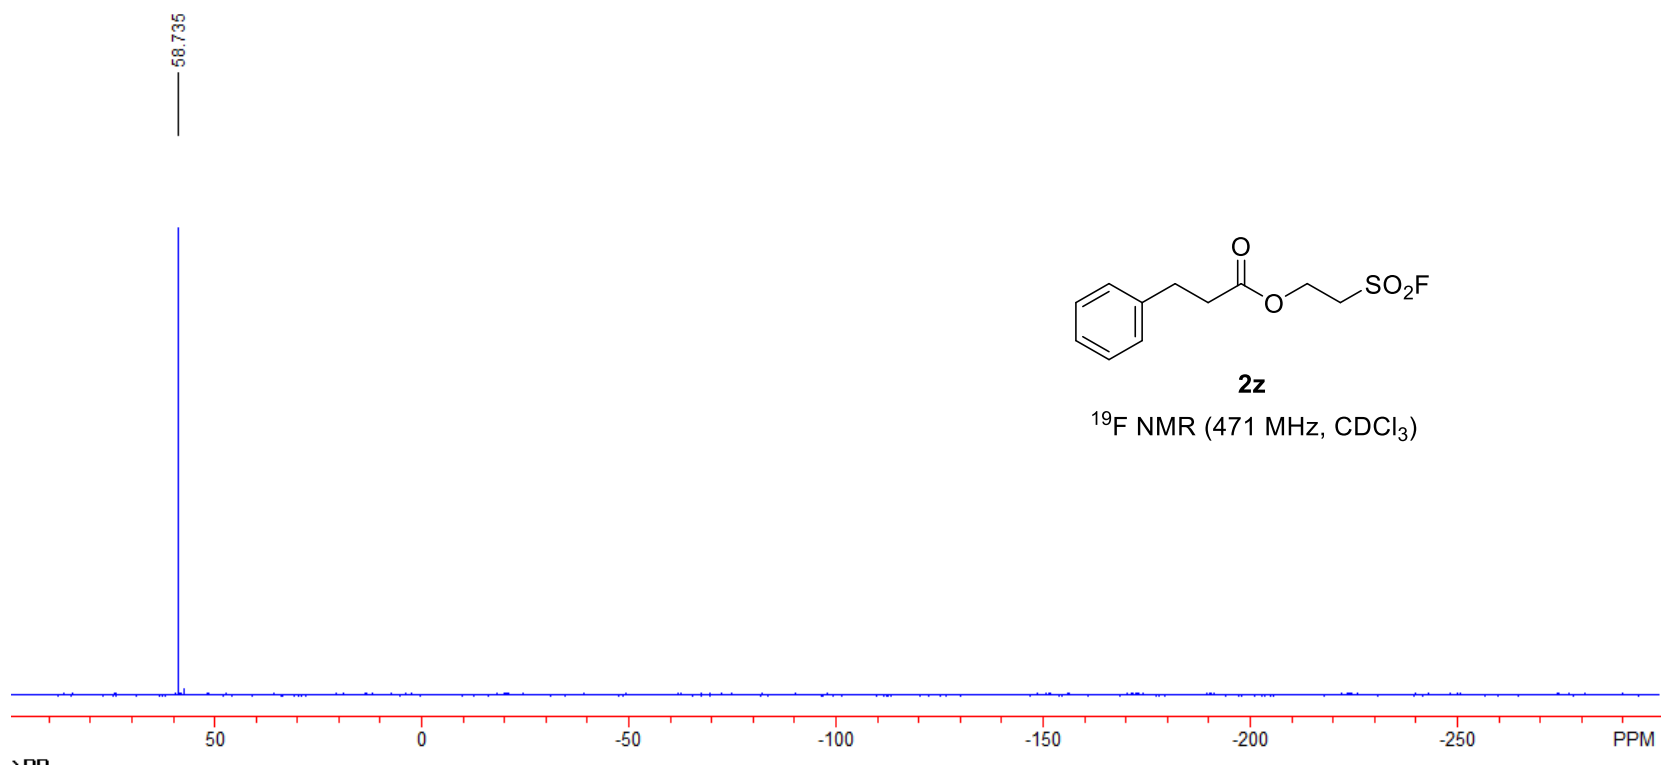

**Figure S78.** The  $^{19}\text{F}$  NMR spectrum of **2z**



**2aa**,  $^1\text{H}$  NMR, 500 MHz,  $\text{CDCl}_3$

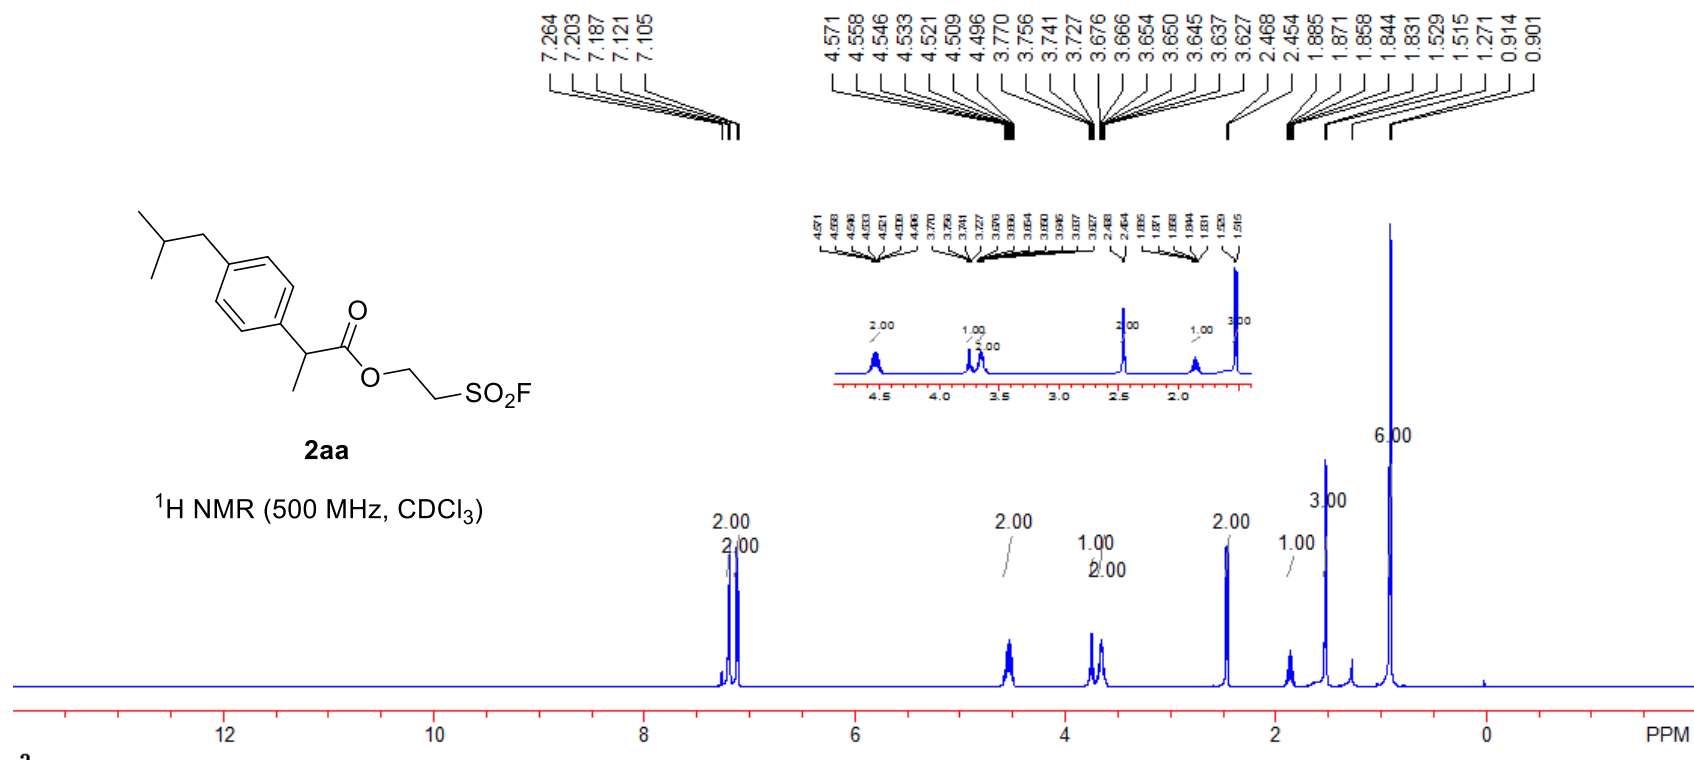

**Figure S79.** The  $^1\text{H}$  NMR spectrum of **2aa**

**2aa**,  $^{13}\text{C}$  NMR, 126 MHz,  $\text{CDCl}_3$

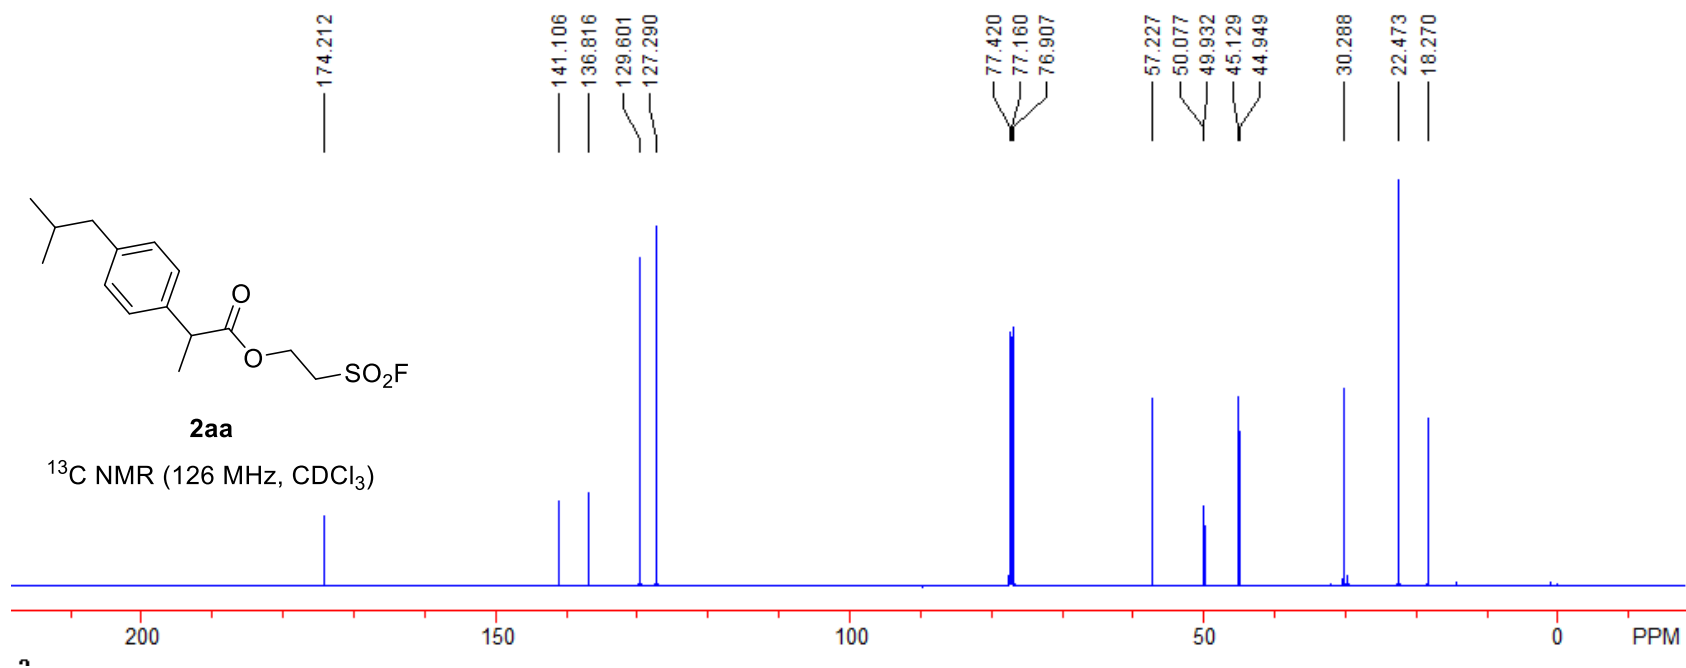

**Figure S80.** The  $^{13}\text{C}$  NMR spectrum of **2aa**

**2aa**,  $^{19}\text{F}$  NMR, 471 MHz,  $\text{CDCl}_3$

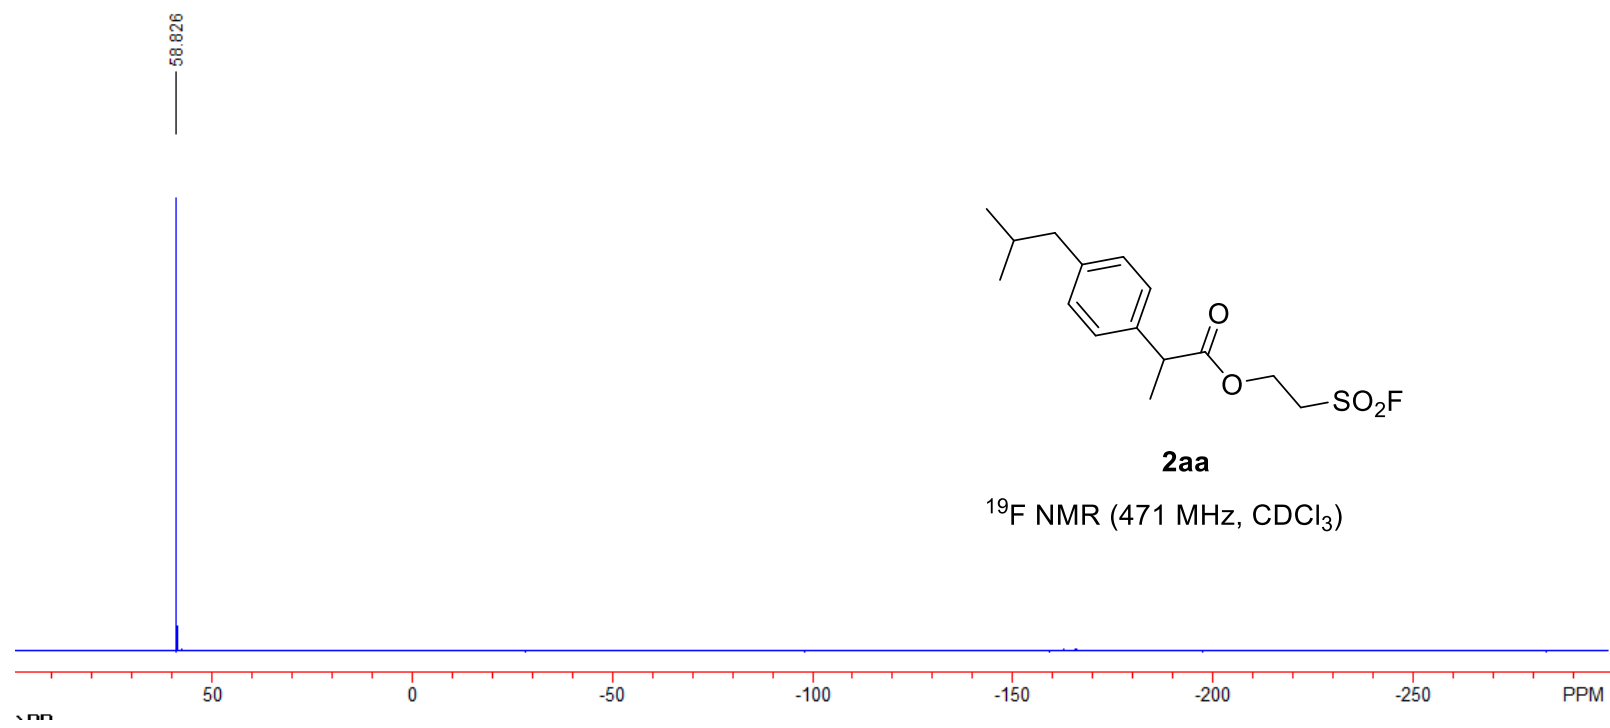

**Figure S81.** The  $^{19}\text{F}$  NMR spectrum of **2aa**

**2ab**,  $^1\text{H}$  NMR, 500 MHz,  $\text{CDCl}_3$

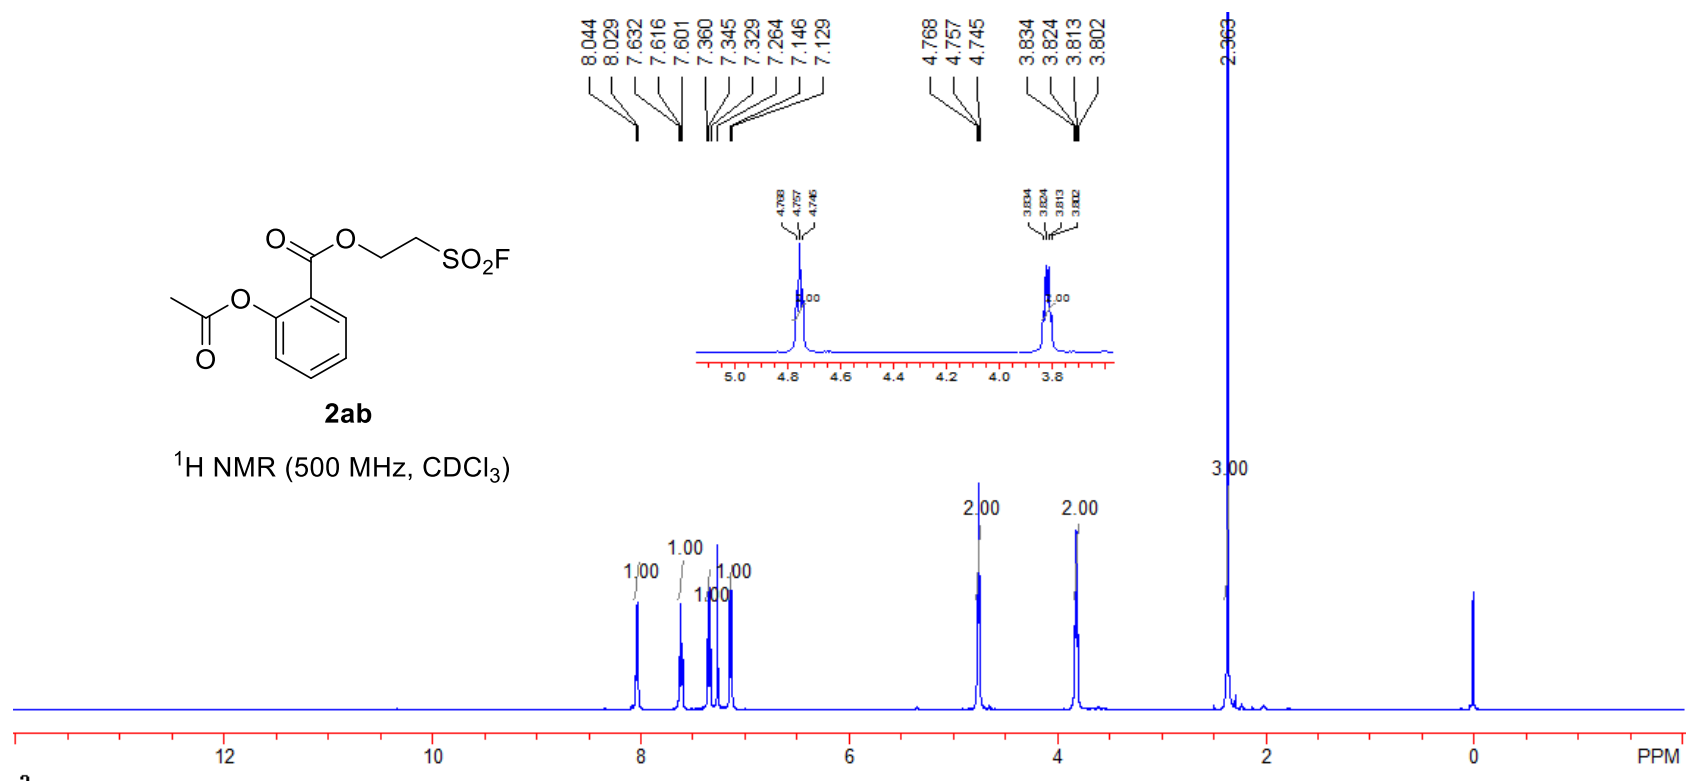

**Figure S82.** The  $^1\text{H}$  NMR spectrum of **2ab**

**2ab**,  $^{13}\text{C}$  NMR, 126 MHz,  $\text{CDCl}_3$

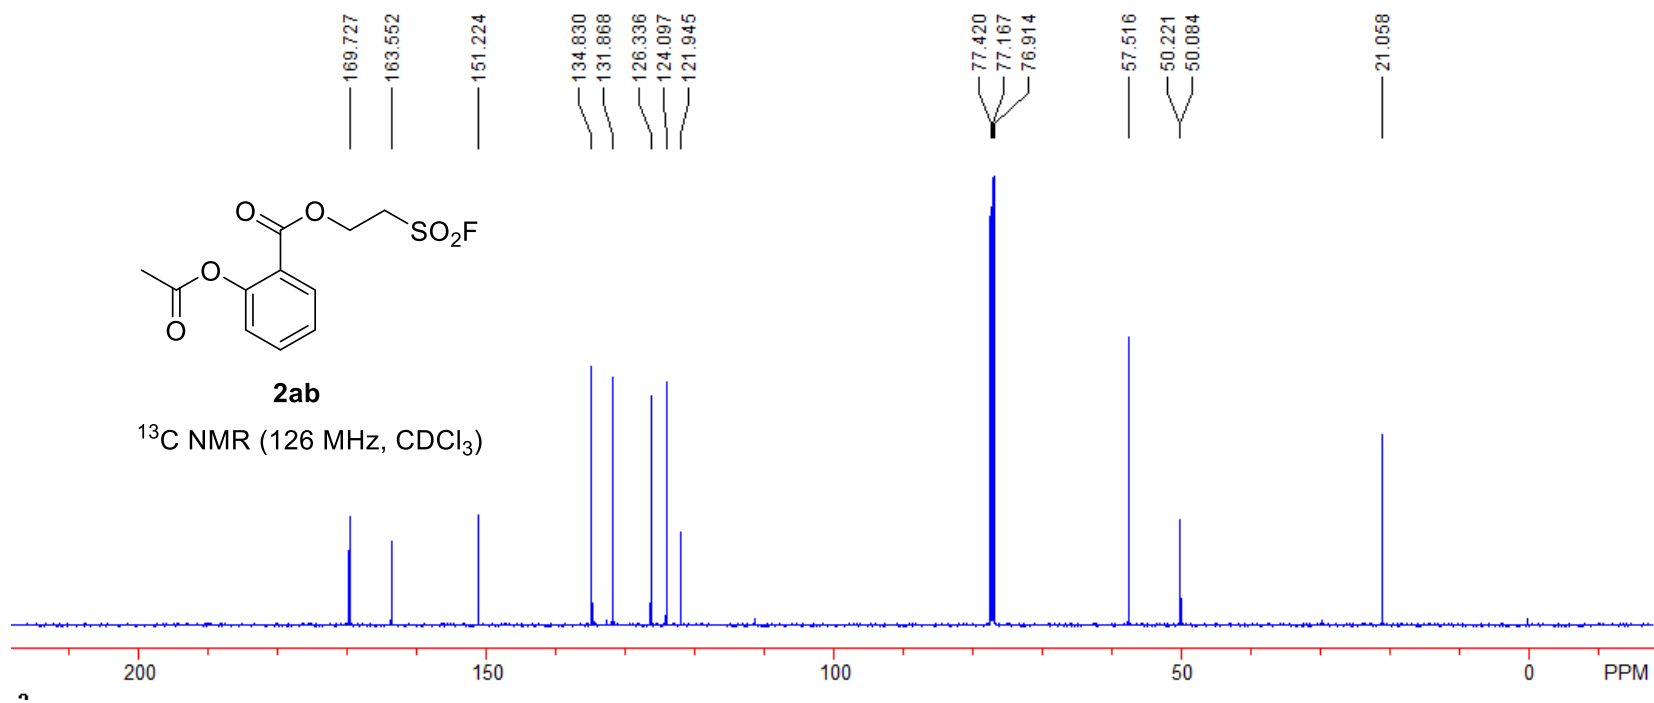

**Figure S83.** The  $^{13}\text{C}$  NMR spectrum of **2ab**

**2ab**,  $^{19}\text{F}$  NMR, 471 MHz,  $\text{CDCl}_3$

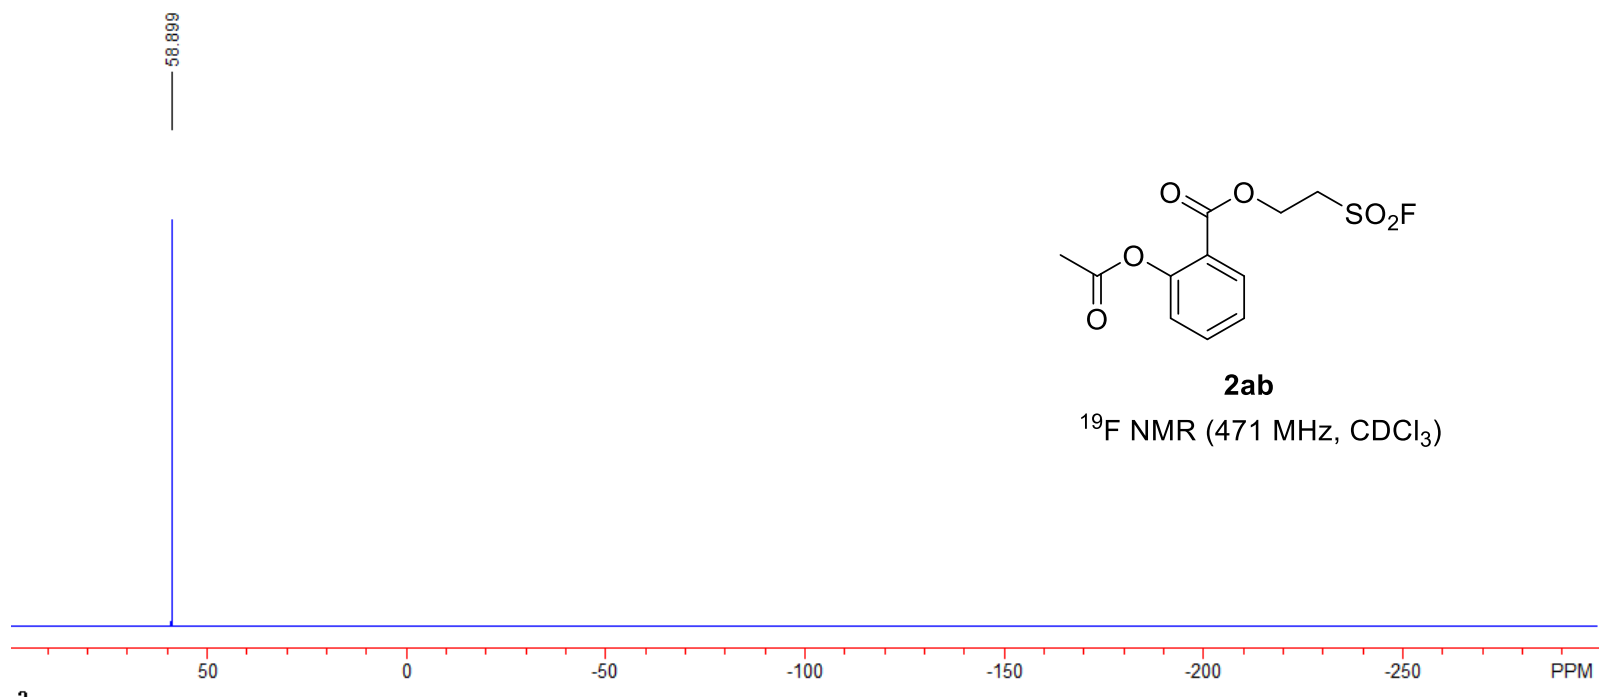

**Figure S84.** The  $^{19}\text{F}$  NMR spectrum of **2ab**

*d-1a*,  $^1\text{H}$  NMR, 500 MHz,  $\text{CDCl}_3$

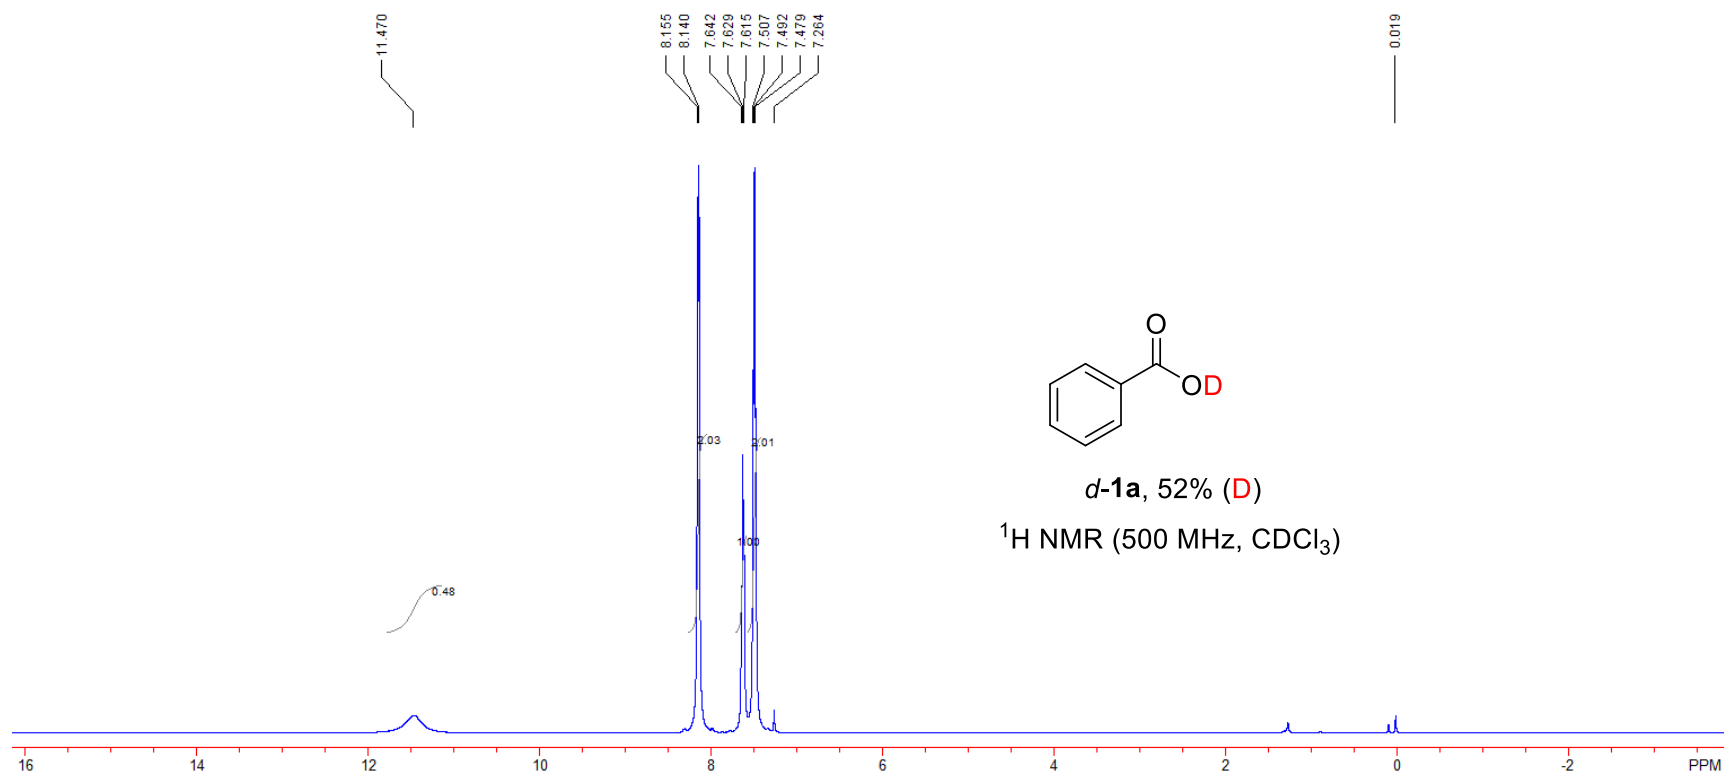

Figure S85. The  $^1\text{H}$  NMR spectrum of *d-1a*

*d-2a*,  $^1\text{H}$  NMR, 500 MHz,  $\text{CDCl}_3$

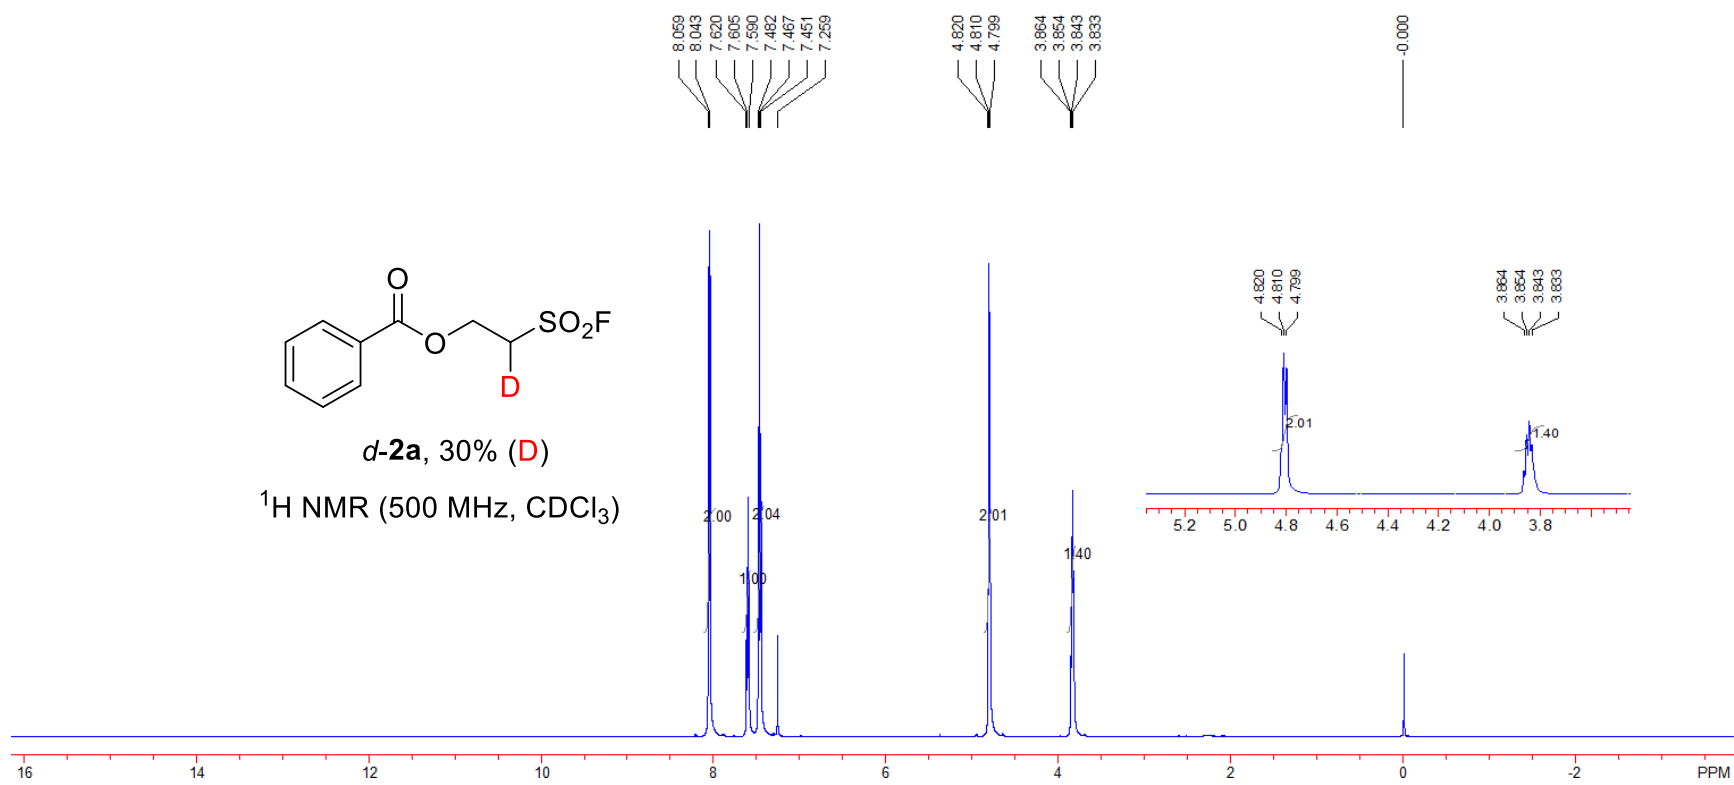

Figure S86. The  $^1\text{H}$  NMR spectrum of *d-2a*



*d-2a*,  $^{19}\text{F}$  NMR, 471 MHz,  $\text{CDCl}_3$

59.051  
59.014

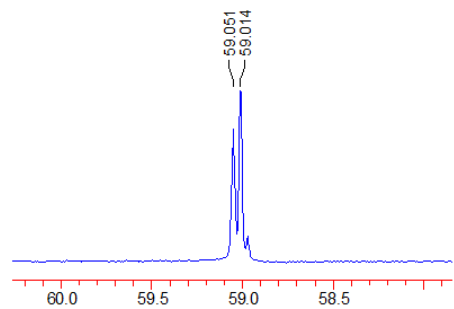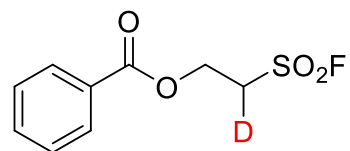

*d-2a*, 30% (D)

$^{19}\text{F}$  NMR (471 MHz,  $\text{CDCl}_3$ )

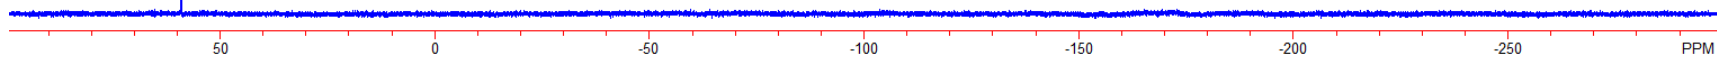

Figure S87. The  $^{19}\text{F}$  NMR spectrum of *d-2a*
